# Supplementary material for: Synthetic ramoplanin analogues are accessible by effective incorporation of arylglycines in solid-phase peptide synthesis
Source: Royal Society of Chemistry journal article supplement (doi:10.1039/d3sc01944f), 2023-09-28
Supplement: d3sc01944f1.pdf [file d3sc01944f1.pdf]

## Synthetic ramoplanin analogues are accessible by effective incorporation of arylglycines in solid-phase peptide synthesis. Electronic Supplementary Information

Edward Marschall,<sup>[a-c]</sup> Rachel W. Cass,<sup>[a-c]</sup> Komal M. Prasad,<sup>[a-c]</sup> James D. Swarbrick,<sup>[d]</sup> Alasdair I. McKay,<sup>[e]</sup> Jennifer A. E. Payne,<sup>[a-c]</sup> Max J. Cryle<sup>[a-c]\*</sup> and Julien Tailhades<sup>[a-c]\*</sup>

[a] Department of Biochemistry and Molecular Biology, The Monash Biomedicine Discovery Institute, Monash University, Clayton, VIC 3800, Australia.

[b] EMBL Australia, Monash University, Clayton, VIC 3800, Australia.

[c] ARC Centre of Excellence for Innovations in Peptide and Protein Science, Clayton, VIC 3800, Australia.

[d] Department of Microbiology, Monash University, Clayton, VIC 3800, Australia

[e] Department of Chemistry, Monash University, Clayton, VIC 3800, Australia.

\* Address correspondence to [julien.tailhades@monash.edu](mailto:julien.tailhades@monash.edu) or [max.cryle@monash.edu](mailto:max.cryle@monash.edu).

|                                                                                                |       |                   |
|------------------------------------------------------------------------------------------------|-------|-------------------|
| <b>Supplementary Methods</b>                                                                   | ..... | <b>Page 1-5</b>   |
| <i>Chemicals and reagents</i>                                                                  | ..... | <i>Page 2</i>     |
| <i>Fmoc-amino acid preparations</i>                                                            | ..... | <i>Page 2</i>     |
| <i>Resin preparations</i>                                                                      | ..... | <i>Page 2</i>     |
| <i>Solid-phase peptide synthesis</i>                                                           | ..... | <i>Page 3</i>     |
| <i>Ramoplanin cyclization by intramolecular native chemical ligation/ desulfurization.....</i> |       | <i>Page 3</i>     |
| <i>Ramoplanin head-to-tail cyclization</i>                                                     | ..... | <i>Page 4</i>     |
| <i>Ramoplanin aglycone (RAGly) preparation</i>                                                 | ..... | <i>Page 4</i>     |
| <i>LCMS and chiral RP-HPLC-MS characterizations</i>                                            | ..... | <i>Page 4</i>     |
| <i>RP-HPLC preparative</i>                                                                     | ..... | <i>Page 4</i>     |
| <i>HRMS characterization</i>                                                                   | ..... | <i>Page 5</i>     |
| <i>NMR Analysis</i>                                                                            | ..... | <i>Page 5-6</i>   |
| <i>MIC determination and bacterial growth</i>                                                  | ..... | <i>Page 8</i>     |
| <b>Supplementary Tables</b>                                                                    | ..... | <b>Page 9-14</b>  |
| <b>Supplementary Figures</b>                                                                   | ..... | <b>Page 15-24</b> |
| <b>Compound characterizations</b>                                                              | ..... | <b>Page 25-55</b> |
| <b>Supplementary References</b>                                                                | ..... | <b>Page 56</b>    |

## Supplementary Methods

### Chemicals and reagents.

(S)-3,5-dihydroxyphenylglycine (H-L-Dpg-OH, Netchem Inc), (S)/(R) 4-hydroxyphenylglycine (H-L/D-Hpg-OH, Oakwood chemical), (S)-4-fluorophenylglycine (Phg(4F), ABCR GmbH), Fmoc-OSu (GL Biochem), Na<sub>2</sub>CO<sub>3</sub> (Sigma-Aldrich), ACN (Merck), 2-Chlorotrityl chloride resin (1 mmol/g, Merck), DCM (Chem-supply), DMF (Ajax Finechem), hydrazine monohydrate 64-65% (Sigma-Aldrich), MeOH (Scharlau), DIEA (Sigma-Aldrich), Fmoc-AA-OH (Merck, Chem-Impex, Iris-Biotech, GL Biochem), Fmoc-(2S)-2-amino-2-{4-[(tert-butoxy)carbonyl amino]phenyl} acetic acid (Fmoc-L-Phg(NH-Boc)-OH, Netchem), COMU (Merck), TEA (Merck), DIC (Oakwood chemicals), Oxyma (Merck), Boc-Glycine (Sigma-Aldrich), 1,5-lutidine (Sigma-Aldrich), DBU (Sigma-Aldrich), palladium-tetrakis (Sigma-Aldrich), phenylsilane (Sigma-Aldrich), TFA (Sigma-Aldrich), DODT (Sigma-Aldrich), TIS (Sigma-Aldrich), GnHCl (Sigma-Aldrich), NaH<sub>2</sub>PO<sub>4</sub> (Sigma-Aldrich), MPAA (Sigma-Aldrich), (4-amino)thiophenol (Sigma-Aldrich), TCEP (Sigma-Aldrich), VA-044 (TCI chemicals), tBuSH (Sigma-Aldrich), EDC (Oakwood chemical), PyBOP (Merck), DPPA (Merck), TFFH (Iris-Biotech).

**Fmoc-amino acid preparations.**<sup>[1]</sup> To a solution of unprotected amino acid (12 mmol) in 1:1 ACN/ 10% Na<sub>2</sub>CO<sub>3</sub> (50 mL) stirring at room temperature was added Fmoc-OSu (4.8 g, 14 mmol) in MeCN (50 mL) dropwise over 30 min at 4°C. The solution was stirred overnight before being diluted with 1M HCl (100 mL) and extracted with ethyl acetate (3 x 100 mL). The combined organic layers were washed with brine (2 x 100 mL), dried over Na<sub>2</sub>SO<sub>4</sub> and the solvent removed in vacuo after filtration of Na<sub>2</sub>SO<sub>4</sub>. The crude products were recrystallized from ethyl acetate (50 mL) with hexanes added to the point of precipitation for Fmoc-L/D-Hpg-OH, Fmoc-L-Hpg(3Cl)-OH\* and Fmoc-L-Phg(4F)-OH. Fmoc-L-Dpg-OH was obtained after sonication the crude powder into a 1: 9 mixture of diethyl ether/ and hexane to remove the Fmoc derivatives (repeated twice). Fmoc-L/D-Tyr(3Cl)-OH were purified by flash column chromatography using a gradient of 0 - 100% in hexane/ ethyl acetate.

\*HCl.H-L-Hpg(3Cl)-OH was obtained using acetic acid/ sulfuryl chloride method applied to L-Hpg. The resulting hydrochloride salt was filtered off and washed with acetic acid (3x) and hexane (3x).<sup>[2]</sup>

**Resin preparations.**<sup>[3]</sup> For compounds (**2a-d**, **3**, **5a-k**, **6**), 2-chlorotrityl chloride resin (200 mg) was swelled in DCM (8 mL, 30 min), washed with DMF (3x), and incubated with a 5% hydrazine solution in DMF (6 mL, 2x 30 min). The resin was washed with DMF (3x), and a solution of DMF/TEA/MeOH (7:2:1) (4 mL, 15 min) added for capping the unreacted 2-chlorotrityl function. The first Fmoc-protected amino acid (0.075 mmol) was coupled to the resin using DIC (0.075 mmol) and Oxyma (0.15 mmol) overnight at room temperature. In the second step, unreacted hydrazine or amino groups were capped with Boc-glycine (0.15 mmol) that had been activated using DIC (0.15 mmol) and Oxyma (0.3 mmol) for 1 h for the linear GPA precursors containing unprotected phenolic groups (**2a-d**, **3**). The capping of unreacted hydrazine groups at the beginning of

ramoplanin synthesis (**5a-k**, **6**) was achieved by a solution of DMF/TEA/acetic anhydride (95:2.5:2.5) (3 mL, 15 min).

For the compounds (**4-S1-3**), The first Fmoc-protected amino acid (0.075 mmol) was coupled to the Rink amide resin using DIC (0.075 mmol) and Oxyma (0.15 mmol) overnight at room temperature. In the second step, unreacted amino groups were capped using a solution of DMF/TEA/acetic anhydride (95:2.5:2.5) (3 mL, 15 min).

For the compounds (**8**, **8(Cl)**, **11-14**), 2-Chlorotrityl chloride resin (200 mg) was swelled in DCM (8 mL, 30 min), washed with DMF (3x), and incubated with Fmoc-Gly-OH (0.075 mmol) and DIEA (0.3 mmol) at room temperature (3mL, 2h). The resin was washed with DMF (3x), and a solution of DMF/TEA/MeOH (7:2:1) (4 mL, 15 min) added for capping the unreacted 2-chlorotrityl function.

**Solid phase peptide synthesis.** From the Fmoc pre-loaded resins, the iterative cycle of an amino acid was performed using a 1% DBU solution (3 mL, 3 x 30 s) in DMF for Fmoc removal, washing with DMF (3x), coupling of the subsequent Fmoc- or Boc-protected amino acid (0.15 mmol) after activation with DIC (0.15 mmol) and Oxyma (0.3 mmol) for 10 min at 50°C (conventional or microwave heating) and washing with DMF (3x). The Fmoc- or Boc-protected amino acids were activated at 4°C during manual SPPS (followed by conventional heating) and *in situ* while using the Liberty Blue from CEM.

For the compounds (**4-S2-3**), a double coupling strategy (Fmoc-amino acid (0.15 mmol), DIC (0.15 mmol) and Oxyma (0.3 mmol) for 10 min at 50°C microwave heating) was performed twice for the final 4 amino acids.

For the compounds (**8**, **8(Cl)**, **11-14**), the on-resin Alloc removal was achieved with a catalytic amount of palladium-tetrakis (10%, 5µmol) using phenylsilane (0.25mmol) as scavenger in DCM (4ml) for 45 minutes. The reaction was repeated twice under nitrogen bubbling.

For compounds (**2a-d**, **3**, **4-S1-3**, **5a-k**, **6** and **8** from **9b**), the cleavage of the hydrazide peptide from resin and removal of protecting groups (tBu, Boc, Trt) was accomplished using a solution of TFA/ TIS/ H<sub>2</sub>O (95: 2.5: 2.5 v/ v'/ v'', 5 mL) with shaking at room temperature for 1 h. The cleavage of **6** containing a N-terminal cysteine was accomplished using TFA/ DODT/ TIS/ H<sub>2</sub>O (95: 2: 2: 1; v/ v'/ v''/ v''', 5 mL) with shaking at room temperature for 1 h. The cleavage of the partially protected peptide (Scheme 1B – leading to **8**, **8(Cl)**, **11-14**) was performed with a solution of HFIP/DCM (30:70 v/v'; 9 mL) with shaking at room temperature (3 mL, 3 x 30min). All the peptides were concentrated under a stream of nitrogen to ~ 1mL volume and precipitated with ice cold diethyl ether (9 mL). The peptide products were washed by centrifugation three times and collected by centrifugation in a flame-resistant centrifuge.

**Ramoplanin cyclization by intramolecular native chemical ligation/ desulfurization.**<sup>[4]</sup> The purified hydrazide peptide (**6**) was dissolved in buffer 1 to a final concentration of 0.75 mM. The solution was cooled to –15 °C

using a salt/ ice bath. Subsequently, 1 M NaNO<sub>2</sub> (5 eq) was added and the mixture was stirred for 15 min. MPAA (leading to **7a**) or MPA (leading to **7b**) (40 eq dissolved in buffer 2) was then added to the reaction. After 15 minutes, the pH was slowly adjusted to 7.2 using 1M NaOH. The reaction mixture was stirred on ice for 2 hours, then TCEP (40 eq in dissolved buffer 2 – pH adjusted to 7.4) was added to reduce all the disulfide bridges. After 15 hours at room temperature, another solution of TCEP (40 eq in dissolved buffer 2 – pH adjusted to 7.4) was added and **7a** or **7b** were isolated after RP-HPLC preparative purification.

**7a** or **7b** were dissolved in buffer 2 containing tBuSH (10%) and TCEP (peptide and TCEP: 2mM) at room temperature. The desulfurization reagent VA-044 dissolved in buffer 2 was added to reach a final concentration of 0.1mM. The temperature of the reaction was set to 35°C. After 4-5hrs, **8** was isolated after RP-HPLC preparative purification.

Buffer 1: GnHCl (6 M) and NaH<sub>2</sub>PO<sub>4</sub> (0.2 M), pH 3 (obtained via addition of HCl).

Buffer 2: GnHCl (6 M) and NaH<sub>2</sub>PO<sub>4</sub> (0.2 M), pH 7.4 (obtained via addition of NaOH).

**Ramoplanin head-to-tail cyclization.** The crude peptide (**9**) was dissolved in DMF/ DCM (50: 50 v/ v') to a final concentration of 0.5 mM. At 4°C, TEA (4 eq) was added followed by PyBOP (2eq) dissolved in 1ml of DMF (100 µl addition every 2 minutes), following the portion wise addition of PyBOP the reaction was allowed to return to room temperature. After 2hrs, the solvent was removed under vacuum pressure and the protecting groups were cleaved using a solution of TFA/ TIS/ H<sub>2</sub>O (95: 2.5: 2.5 v/ v'/ v'', 5 mL) with shaking at room temperature for 1 h. The crude peptide **8** was isolated as described in **Solid phase peptide synthesis** section and purified by RP-HPLC preparative. The same protocol – SPPS, cyclization and TFA cleavage – was applied to the synthesis of the peptides **8(Cl)** and **11-14**.

**Ramoplanin aglycone (RAgly) preparation.** The protocol was adapted from the reported in the following patent (US5491128A, Aglycons of A/16686 antibiotics). To a 50mL round bottom flask containing DMF (2 mL) and ACN (2 mL), NaI (4 eq, 23.5mg) was added followed by Ramoplanin A2 (99mg, 90% purity) with stirring at room temperature to form a white suspension. TMS-Cl (41 eq, 204µL) was then added, and the suspension became transparent rapidly and slowly turned yellow. The reaction was then heated at 75°C for 3 h. The mixture was then allowed to cool to room temperature and water was added, the pH was then adjusted to 4 with NaHCO<sub>3</sub> the reaction mixture was extracted 3 times with n-butanol. The combined butanolic fractions were removed in vacuo with repeated additions of toluene until dry. The dried residue was resolubilised in 4 mL of DMF and purified via preparative RP-HPLC on a gradient of 25-25-80% over 40 minutes. Yield 38.4% (33.2 mg including TFA salt).

**LCMS and chiral RP-HPLC-MS characterizations.** All LCMS analyses were carried out on a Shimadzu high performance liquid chromatography system coupled to mass spectrometer LCMS-2020 (ESI, operating both in positive and negative mode) equipped with a SPD-20A Prominence photo diode array detector and a LC-20AD solvent delivery module. Analytical separations were performed using an Agilent C18 column (300SB-C18,

5 $\mu$ m, 4.6 x 250 mm) and the detection was performed at 214 nm and 254nm. LCMS-grade solvents were used as such: water + 0.1% FA (solvent A) and ACN + 0.1% FA (solvent B).

Chiral RP-HPLC-MS was carried out on the same system as the LCMS characterization using a Phenomenex chiral column (Lux, 5 $\mu$ m, Cellulose-1, 150 x 10 mm) and the detection was performed at 214 nm and 254nm. LCMS-grade solvents were used as such: water + 0.1% FA (solvent A) and ACN + 0.1% FA (solvent B).

Gradient: 0% of B (5min isocratic), then 0% to 40% of B in 50 min at a flow rate of 2 mL/min.

**RP-HPLC preparative.** All purifications were performed using a Shimadzu high performance liquid chromatography system equipped with a SPD-M20A Prominence photo diode array detector and two LC-20AP pumps. Preparative separations were performed using a Zorbax SB-C18 column from Agilent (7  $\mu$ m, 21.2 x 250 mm) with a flow rate of 10 mL/min. The solvents used were water + 0.1% TFA (solvent A) and HPLC-grade ACN + 0.1% TFA (solvent B).

**HRMS analysis.** Samples were separated on a RSLC 3000 LC system (Thermo) coupled to an Orbitrap Fusion Tribrid mass spectrometer (Thermo Scientific). The LC system consisted of a trap column Acclaim PepMap 100 (100  $\mu$ m x 2 cm, nanoViper, C18, 5  $\mu$ m, 100Å; Thermo Scientific) and an Acclaim PepMap RSLC analytical column (75  $\mu$ m x 50 cm, nanoViper, C18, 2  $\mu$ m, 100Å; Thermo Scientific). Samples were loaded onto the trap column in  $\mu$ L-pickup mode using 2% acetonitrile, 0.1% TFA transport liquid. The columns were developed with a 30min gradient from 6% to 30% acetonitrile in 0.1% formic acid at 250nL/min coupled to the mass spectrometer nanospray source operated at 1.7kV. The mass spectrometer was operated in data dependent and PRM mode to target the appropriate species. Full scans were acquired at 70k to 500k resolution and MS<sup>2</sup> spectra acquired at 35k or 70k resolution, with a 1.5-1.8 m/z isolation window and normalized collision energy between 25 and 33.

Raw data was manually analyzed in XCalibur QualBrowser (Thermo Scientific), with extracted ion chromatograms to the predicted species generated with 10ppm mass tolerance. MS<sup>2</sup> spectra corresponding to the predicted mass were manually characterized for ring closures based on predicted neutral loss peaks of non-crosslinked residues.

#### **NMR analysis.**

Data collection: Samples for NMR contained 4 mM of **8** in a 10mM acetate NMR buffer (80% H<sub>2</sub>O: 20% DMSO(d<sub>6</sub>) pH 4.5). All experiments were recorded on a Bruker 600 MHz NMR spectrometer equipped with a cryoprobe and Z axis gradient. 2D <sup>13</sup>C HSQC (acquisition times t<sub>1</sub> = 4ms, t<sub>2</sub> = 53ms) and 2D H<sub>2</sub>BC experiments (acquisition times t<sub>1</sub> = 5.7ms, t<sub>2</sub> = 56ms) were recorded using gradients for coherence selection and sensitivity enhancement with additional presaturation of the solvent signal if required. A 2D fast <sup>15</sup>N HSQC (Acquisition times t<sub>1</sub> = 19ms, t<sub>2</sub> = 65ms) was also acquired using a soft watergate element for solvent suppression. 1D <sup>1</sup>H and 2D <sup>1</sup>H-<sup>1</sup>H NOESY (with mixing times ranging from 250-450ms) and 2D <sup>1</sup>H-<sup>1</sup>H TOCSY experiments (mixing time 70ms, acquisition times t<sub>2</sub> = 425ms, t<sub>1</sub> = 32ms) used a DPFGE sequence for water suppression.<sup>[7]</sup> Typical

acquisition times for the NOESY experiments were 425ms (t2) and 32ms (t1). Experiments were recorded at 40, 25 and 15 °C which served to overcome some peak overlap which also expedited structural convergence in the calculations. Spectra were processed with nmrPipe<sup>[8]</sup> and analysed with Xeasy<sup>[9]</sup> or Sparky(<https://www.cgl.ucsf.edu/home/sparky>).<sup>[10]</sup> Backbone assignments were made using the standard sequential NOE based assignment strategy using 2D TOCSY and 2D NOESY data and sidechain assignments were further aided using the 2D <sup>13</sup>C-<sup>1</sup>H H2BC experiment.

Structure Calculations: Structures were calculated in a semi-automatic manner using CYANA version 3.0 using the noeassign macro.<sup>[11]</sup> 200 structures were calculated at each of the seven cycles and the top 20 carried forward to the next cycle. The <sup>1</sup>H chemical shift tolerance was set to 0.013 in both dimensions and the 'dref' set to 5.0 Å during automatic calibration of upper bound distance restraints to allow for the effects of spin diffusion. Hydrogen bond restraints were included in cases where several hydrogen bonds were observed in the structure ensemble and when the amide temperature coefficient was markedly lowered (residues D-Thr5, D-Orn10 and Gly14). New CYANA library entries were constructed for the non-standard residues by first building and minimizing the coordinates in Chimera.<sup>[12]</sup> The library file for the D amide acids was constructed by inverting the sign of the y coordinate of the standard residue within CYANA.

Several, unambiguous trans annular NOEs (HN-HN, HA-HN) were observed consistent with the two stranded anti-parallel sheet observed in ramoplanin as well as a beta turn (residues 8-11). NOESY peaks were assigned using rounds of semi-automatic NOE assignments and structure calculations in torsion angle space using CYANA3. The cyclized amide bond was constructed using upper and lower limit NOEs with a scaling factor of 100 using the 'link' command in CYANA. Structures were calculated with the linkage between L-Dap2 and Hpg17 implemented as either a cis or trans amide. The trans geometry was inferred based on the observed increase in NOE violations for the cis variant as well as an observed hydrogen bond between the sidechain HN<sub>y</sub> to the backbone carbonyl of Gly14 which was consistent with a low value of the amide temperature coefficient for the trans (-2.83 ppb/K). In comparison, the sidechain amide was completely solvent exposed in the cis variant ensemble.

Deposition of the chemical shifts, coordinates and restraints: In the deposited chemical shift at the BMRB (STAR file 52188) and the coordinates at the PDB (8V4B), the sequence starts with 6NA as residue 1 ending in D4P 18. Note, during the validation process against the NMR restraints at the PDB, only 252 out of the total of 342 NMR restraints (Table S3) were included in the NMR validation step and the statistics. This is because the NMR restraint statistics software used at the PDB is limited and does not parse NOEs involving pseudo atoms for the non-canonical residues 6NA, GHP and D4P. During publication, correspondence with the PDB to deposit the full NOE list using the older nmr .text format (with a suitable header which can define the pseudoatoms) was unfortunately not successful, meaning that the subset of NOEs (252) converted and stored in the combined nmr data (nef) .str file by the PDB is incomplete and should be viewed as such. The pseudoatom definitions used here are shown under Table S3 for completeness.

#### Structural statistics and upper distance limits:

Total: 330

short-range,  $|i-j| \leq 1$ : 176

medium-range,  $1 < |i-j| < 5$ : 50

long-range,  $|i-j| \geq 5$ : 104

Other upper distance restraints: 12

H bond upper restraints: 6

Trans amide cyclisation upper restraints: 6

CYANA target function:  $0.31 \pm 0.018 \text{ \AA}^2$

Average backbone RMSD to mean:  $0.09 \pm 0.03 \text{ \AA}$  (res 1-17),  $0.17 \pm 0.07 \text{ \AA}$  (including lipid)

Average heavy atom RMSD to mean:  $0.29 \pm 0.06 \text{ \AA}$  (res 1-17),  $0.49 \pm 0.16 \text{ \AA}$  (including lipid)

Maximum NOE violation:  $0.14 \text{ \AA}$

#### ***MIC determination and bacterial growth.***

***Ramoplanin Antimicrobial assay:*** The antimicrobial activity of the synthetic ramoplanin peptides (**8**, **8(Cl)**, **11-14**) were determined against *MSSA*, *MRSA* and *VISA* alongside vancomycin (**Van**), ramoplanin A2 (**RA2**) and **RAGly**. The assays were conducted in accordance with the Clinical and Laboratory Standards Institute guidelines for microbroth dilution assays, with the addition of absorbance measurements being taken. Stocks of each compound were loaded into 96-well flat bottom polypropylene microtiter plates (Greiner) as two-fold serial dilutions, at 10 times the final required concentration. The stocks were diluted in DMSO, which had a final concentration of 2.0% after addition of the *S. aureus* at  $5 \times 10^5$  CFU/ml in Cation-Adjusted Mueller Hinton Broth II (Becton Dickson). The plates were covered with BreatheEasy membranes (Diversified Biotech) and a Clariostar plate reader was used to measure the absorbance of each well at 595nm every 4 h for 48 h with orbital averaging after linear shaking (software v5.20R5, BMG Labtech). The minimum inhibitory concentration was determined by the lowest drug concentration that resulted in clear well by eye indicating bacterial growth inhibition. Percentage growth of each well was calculated from the absorbance measurements taken at 20 h relative to the average of the no compound controls on the same plate. GraphPad Prism 9 software was used to plot the average of two biological replicates, each the average of three technical replicates (Table S4). Similarly, the bacterial absorbance ( $OD_{600 \text{ nm}}$ ) of each well was measured at 595 nm every 4 h for 48 h (Clariostar plate reader, software v5.20R5, BMG). The percentage growth was calculated relative to the no

compound control and the average of three biological replicates plotted using GraphPad Prism 9 software (Figure S8-10).

*Bacterial isolates and media:* The *S. aureus* strains – MSSA (ATCC 29213), MRSA (A8090 – ST5 genotype)<sup>[5]</sup> and VISA (A8094 – ST5 genotype)<sup>[6]</sup> – were stored in glycerol broth at -80 °C. The strains were cultured in Brain Heart Infusion broth (Becton Dickson) at 37 °C with shaking and grown in Cation-Adjusted Mueller Hinton Broth II (Becton Dickson) for testing.

## Supplementary Tables

**Table S1.** Summary on the preliminary syntheses of GPA precursors. **1** (vancomycin heptapeptide) and **2a** (teicoplanin heptapeptide) were previously synthesized with COMU/lutidine as coupling reagent. **2b-c** and **3** (corbomycin heptapeptide) were used to validate the benefit of DIC/Oxyma.

| Entry     | Arylglycine ratio* | Coupling reagent | Temperature (°C) | AA cycle time (min) | Peptide recovery (%) | Peptide purity at 214nm (%) |
|-----------|--------------------|------------------|------------------|---------------------|----------------------|-----------------------------|
| <b>1</b>  | 3/ 7               | COMU/lutidine    | RT               | 35                  | 46                   | 50                          |
| <b>2a</b> | 5/ 7               |                  | RT               | 35                  | 32                   | 12                          |
| <b>2b</b> | 5/ 7               | DIC/Oxyma        | RT               | 35                  | 43                   | 47                          |
| <b>2c</b> | 5/ 7               |                  | 50 (mw)          | 15                  | 47                   | 47                          |
| <b>2d</b> | 5/ 7               |                  | 50 (ch)          | 15                  | 54                   | 49                          |
| <b>3</b>  | 6/ 9               |                  | 50 (mw)          | 15                  | 61                   | 51                          |

Abb. RT: room temperature; mw: microwave; ch: conventional heating.

**Table S2.** Macrolactamization optimisation and the effect of the coupling reagent.

| Entry      | Basis     | Solvent          | Coupling system        | Peptide purity at 214nm (%), 1h | Peptide purity at 214nm (%), 15h |
|------------|-----------|------------------|------------------------|---------------------------------|----------------------------------|
| <b>10a</b> | TEA (1eq) | DCM/ DMF (50:50) | EDC (2eq)/ Oxyma (4eq) | nd                              | 10                               |
| <b>10b</b> |           |                  | PyBOP (2eq)/ TEA (2eq) | 19                              | 19                               |
| <b>10c</b> |           |                  | DEPBT (2eq)/ TEA (2eq) | 1                               | 10                               |
| <b>10d</b> |           |                  | DPPA (2eq)/ TEA (2eq)  | 1                               | 7                                |
| <b>10e</b> |           |                  | TFFH (2eq)/ TEA (2eq)  | 6                               | 4                                |

Abb. ch: conventional heating. DEPBT: 3- (Diethylphosphoryloxy)-1,2,3-benzotriazin-4 (3H)-one; DPPA: Diphenylphosphoryl azide. TFFH: N,N,N',N'-Tetramethylfluoroformamidinium hexafluoro-phosphate.

**Table S3.** Summary of all dataset NOEs.

| NOE Restraints |     |      |    |     |      | NOE Restraints |   |     |     |    |     |     |      |
|----------------|-----|------|----|-----|------|----------------|---|-----|-----|----|-----|-----|------|
| 0              | 6NA | QA   | 15 | LEU | HA   | 5.5            | 7 | GHP | H   | 9  | PHE | H   | 5.5  |
| 0              | 6NA | QA   | 16 | DAL | QB   | 5.5            | 7 | GHP | H   | 9  | PHE | QD  | 5.5  |
| 0              | 6NA | QA   | 0  | 6NA | QD   | 5.5            | 7 | GHP | H   | 10 | ORD | H   | 4.29 |
| 0              | 6NA | QA   | 0  | 6NA | QE   | 5.5            | 7 | GHP | H   | 10 | ORD | HB2 | 5.5  |
| 0              | 6NA | QA   | 1  | ASN | H    | 5.5            | 7 | GHP | H   | 10 | ORD | HB3 | 5.5  |
| 0              | 6NA | QA   | 1  | ASN | HA   | 5.5            | 7 | GHP | H   | 11 | D4P | HA  | 5.48 |
| 0              | 6NA | QA   | 2  | DPP | H    | 5.5            | 7 | GHP | H   | 11 | D4P | QD  | 5.5  |
| 0              | 6NA | QB   | 1  | ASN | H    | 4.92           | 7 | GHP | H   | 11 | D4P | QG  | 5.49 |
| 0              | 6NA | QB   | 2  | DPP | H    | 5.5            | 7 | GHP | H   | 7  | GHP | QD  | 4.44 |
| 0              | 6NA | QD   | 1  | ASN | H    | 5.5            | 7 | GHP | H   | 7  | GHP | QG  | 3.66 |
| 0              | 6NA | QE   | 1  | ASN | H    | 5.5            | 7 | GHP | H   | 8  | THR | H   | 5.25 |
| 0              | 6NA | QG   | 1  | ASN | H    | 5.5            | 7 | GHP | H   | 8  | THR | QG2 | 5.5  |
| 0              | 6NA | QB   | 2  | DPP | H    | 5.5            | 7 | GHP | HA  | 9  | PHE | H   | 4.58 |
| 0              | 6NA | QG   | 2  | DPP | H    | 5.5            | 7 | GHP | HA  | 9  | PHE | QD  | 5.5  |
| 1              | ASN | H    | 15 | LEU | HA   | 5.13           | 7 | GHP | HA  | 9  | PHE | QE  | 5.41 |
| 1              | ASN | H    | 15 | LEU | QB   | 5.5            | 7 | GHP | HA  | 10 | ORD | H   | 5.5  |
| 1              | ASN | H    | 15 | LEU | QD1  | 5.5            | 7 | GHP | HA  | 8  | THR | H   | 3.33 |
| 1              | ASN | H    | 15 | LEU | QD2  | 5.5            | 7 | GHP | HA  | 8  | THR | HA  | 4.78 |
| 1              | ASN | H    | 16 | DAL | H    | 5.5            | 7 | GHP | HA  | 8  | THR | HB  | 5.38 |
| 1              | ASN | H    | 1  | ASN | HB2  | 4.04           | 7 | GHP | HA  | 8  | THR | QG2 | 4.67 |
| 1              | ASN | H    | 1  | ASN | HB3  | 4.07           | 7 | GHP | QD  | 8  | THR | H   | 5.18 |
| 1              | ASN | H    | 1  | ASN | HD21 | 4.6            | 7 | GHP | QD  | 8  | THR | QG2 | 5.1  |
| 1              | ASN | H    | 1  | ASN | HD22 | 4.88           | 7 | GHP | QG  | 10 | ORD | H   | 5.22 |
| 1              | ASN | H    | 2  | DPP | HB3  | 5.44           | 7 | GHP | QG  | 10 | ORD | HB3 | 5.5  |
| 1              | ASN | HA   | 13 | D4P | QD   | 5.18           | 7 | GHP | QG  | 8  | THR | H   | 4.18 |
| 1              | ASN | HA   | 15 | LEU | H    | 5.5            | 7 | GHP | QG  | 8  | THR | HA  | 5.13 |
| 1              | ASN | HA   | 15 | LEU | HA   | 4.48           | 7 | GHP | QG  | 8  | THR | QG2 | 5.28 |
| 1              | ASN | HA   | 16 | DAL | H    | 5.11           | 8 | THR | H   | 9  | PHE | H   | 4.27 |
| 1              | ASN | HA   | 17 | D4P | H    | 5.5            | 8 | THR | H   | 8  | THR | HB  | 3.89 |
| 1              | ASN | HA   | 17 | D4P | QG   | 5.5            | 8 | THR | H   | 8  | THR | QG2 | 4.2  |
| 1              | ASN | HA   | 2  | DPP | H    | 3.35           | 8 | THR | HA  | 9  | PHE | QD  | 5.5  |
| 1              | ASN | HA   | 2  | DPP | HB3  | 5.5            | 8 | THR | HA  | 10 | ORD | H   | 5.5  |
| 1              | ASN | HB2  | 13 | D4P | QD   | 4.81           | 8 | THR | HA  | 10 | ORD | QG  | 5.5  |
| 1              | ASN | HB2  | 14 | GLY | H    | 4.53           | 8 | THR | HA  | 8  | THR | QG2 | 3.54 |
| 1              | ASN | HB2  | 14 | GLY | QA   | 5.34           | 8 | THR | HB  | 9  | PHE | H   | 4.55 |
| 1              | ASN | HB2  | 15 | LEU | HA   | 5.5            | 8 | THR | HB  | 9  | PHE | QD  | 5.42 |
| 1              | ASN | HB2  | 2  | DPP | H    | 4.52           | 8 | THR | HB  | 9  | PHE | QE  | 5.47 |
| 1              | ASN | HB3  | 13 | D4P | QD   | 5.1            | 8 | THR | QG2 | 9  | PHE | H   | 4.96 |
| 1              | ASN | HB3  | 14 | GLY | H    | 5.5            | 8 | THR | QG2 | 9  | PHE | HZ  | 4.12 |
| 1              | ASN | HB3  | 15 | LEU | HA   | 5.5            | 8 | THR | QG2 | 9  | PHE | QD  | 4.67 |
| 1              | ASN | HB3  | 2  | DPP | H    | 4.61           | 8 | THR | QG2 | 9  | PHE | QE  | 4.66 |
| 1              | ASN | HD21 | 15 | LEU | QQD  | 5.44           | 8 | THR | QG2 | 10 | ORD | H   | 5.5  |
| 1              | ASN | HD21 | 2  | DPP | H    | 5.49           | 9 | PHE | H   | 9  | PHE | HB2 | 3.96 |
| 2              | DPP | H    | 13 | D4P | QD   | 5.5            | 9 | PHE | H   | 9  | PHE | HB3 | 4.03 |
| 2              | DPP | H    | 15 | LEU | HA   | 5.01           | 9 | PHE | H   | 9  | PHE | QD  | 4.05 |
| 2              | DPP | H    | 15 | LEU | QB   | 5.5            | 9 | PHE | HA  | 9  | PHE | QD  | 3.76 |

|   |     |     |    |     |     |      |    |     |     |    |     |     |      |
|---|-----|-----|----|-----|-----|------|----|-----|-----|----|-----|-----|------|
| 2 | DPP | H   | 15 | LEU | QQD | 5.44 | 9  | PHE | HA  | 9  | PHE | QE  | 4.84 |
| 2 | DPP | H   | 16 | DAL | H   | 5.5  | 9  | PHE | HA  | 10 | ORD | QG  | 5.5  |
| 2 | DPP | H   | 16 | DAL | QB  | 5.5  | 9  | PHE | HB2 | 10 | ORD | H   | 4.88 |
| 2 | DPP | H   | 17 | D4P | H   | 5.22 | 9  | PHE | HB2 | 17 | D4P | HA  | 5.5  |
| 2 | DPP | H   | 17 | D4P | QG  | 5.5  | 9  | PHE | HB2 | 17 | D4P | QG  | 5.5  |
| 2 | DPP | H   | 2  | DPP | HB2 | 3.9  | 9  | PHE | HB3 | 10 | ORD | H   | 4.77 |
| 2 | DPP | H   | 2  | DPP | HG1 | 4.08 | 9  | PHE | HB3 | 17 | D4P | HA  | 4.93 |
| 2 | DPP | H   | 3  | GHP | H   | 4.81 | 9  | PHE | HB3 | 17 | D4P | QD  | 5.46 |
| 2 | DPP | HA  | 3  | GHP | HA  | 5.5  | 9  | PHE | HB3 | 17 | D4P | QG  | 5.32 |
| 2 | DPP | HA  | 3  | GHP | QD  | 5.5  | 9  | PHE | QD  | 9  | PHE | HZ  | 3.86 |
| 2 | DPP | HA  | 3  | GHP | QG  | 5.5  | 9  | PHE | QD  | 17 | D4P | HA  | 5.5  |
| 2 | DPP | HB2 | 17 | D4P | H   | 5.5  | 10 | ORD | H   | 10 | ORD | HB3 | 4.04 |
| 2 | DPP | HB2 | 17 | D4P | QG  | 5.5  | 10 | ORD | H   | 10 | ORD | QD  | 5.5  |
| 2 | DPP | HB2 | 3  | GHP | H   | 4.67 | 10 | ORD | H   | 10 | ORD | QG  | 4.4  |
| 2 | DPP | HB2 | 3  | GHP | HA  | 5.5  | 10 | ORD | H   | 11 | D4P | H   | 5.02 |
| 2 | DPP | HB2 | 3  | GHP | QG  | 4.81 | 10 | ORD | HA  | 11 | D4P | H   | 3.39 |
| 2 | DPP | HB3 | 15 | LEU | HA  | 5.5  | 10 | ORD | HA  | 11 | D4P | QG  | 5.5  |
| 2 | DPP | HB3 | 17 | D4P | H   | 5.5  | 10 | ORD | HB2 | 11 | D4P | H   | 4.51 |
| 2 | DPP | HB3 | 17 | D4P | HA  | 5.5  | 10 | ORD | HB2 | 11 | D4P | QD  | 5.11 |
| 2 | DPP | HB3 | 17 | D4P | QG  | 5.5  | 10 | ORD | HB2 | 11 | D4P | QG  | 4.79 |
| 2 | DPP | HB3 | 3  | GHP | H   | 4.9  | 10 | ORD | HB3 | 11 | D4P | H   | 4.96 |
| 2 | DPP | HG1 | 16 | DAL | H   | 5.19 | 10 | ORD | HB3 | 11 | D4P | QG  | 5.47 |
| 2 | DPP | HG1 | 16 | DAL | HA  | 5.5  | 10 | ORD | QG  | 11 | D4P | H   | 5.35 |
| 2 | DPP | HG1 | 16 | DAL | QB  | 5.5  | 10 | ORD | QG  | 11 | D4P | QD  | 5.5  |
| 2 | DPP | HG1 | 17 | D4P | H   | 4.19 | 11 | D4P | H   | 11 | D4P | QD  | 4.19 |
| 2 | DPP | HG1 | 17 | D4P | HA  | 4.47 | 11 | D4P | H   | 11 | D4P | QG  | 4.49 |
| 2 | DPP | HG1 | 17 | D4P | QG  | 4.58 | 11 | D4P | HA  | 12 | DTH | H   | 3.53 |
| 2 | DPP | HG1 | 3  | GHP | HA  | 5.5  | 11 | D4P | HA  | 12 | DTH | QG2 | 5.35 |
| 3 | GHP | H   | 13 | D4P | HA  | 5.5  | 11 | D4P | QD  | 12 | DTH | H   | 5    |
| 3 | GHP | H   | 14 | GLY | H   | 5.5  | 11 | D4P | QD  | 12 | DTH | QG2 | 4.58 |
| 3 | GHP | H   | 3  | GHP | QD  | 5.09 | 11 | D4P | QG  | 12 | DTH | H   | 3.72 |
| 3 | GHP | H   | 3  | GHP | QG  | 3.56 | 11 | D4P | QG  | 12 | DTH | QG2 | 4.65 |
| 3 | GHP | HA  | 13 | D4P | H   | 5.5  | 12 | DTH | H   | 12 | DTH | QG2 | 4.21 |
| 3 | GHP | HA  | 13 | D4P | HA  | 3.9  | 12 | DTH | HA  | 12 | DTH | QG2 | 3.75 |
| 3 | GHP | HA  | 13 | D4P | QD  | 5.5  | 12 | DTH | HA  | 13 | D4P | H   | 3.52 |
| 3 | GHP | HA  | 13 | D4P | QG  | 5.46 | 12 | DTH | HA  | 13 | D4P | QG  | 4.77 |
| 3 | GHP | HA  | 14 | GLY | H   | 5.06 | 12 | DTH | HB  | 13 | D4P | H   | 4.21 |
| 3 | GHP | HA  | 17 | D4P | QD  | 5.28 | 12 | DTH | HB  | 13 | D4P | QG  | 4.73 |
| 3 | GHP | HA  | 17 | D4P | QG  | 5.18 | 12 | DTH | QG2 | 13 | D4P | H   | 4.41 |
| 3 | GHP | HA  | 4  | ORD | HA  | 5.5  | 12 | DTH | QG2 | 13 | D4P | HA  | 5.5  |
| 3 | GHP | HA  | 4  | ORD | HB2 | 5.5  | 12 | DTH | QG2 | 13 | D4P | QD  | 4.62 |
| 3 | GHP | HA  | 4  | ORD | HB3 | 5.5  | 12 | DTH | QG2 | 13 | D4P | QG  | 4.36 |
| 3 | GHP | HA  | 5  | DTH | H   | 4.94 | 13 | D4P | H   | 13 | D4P | QD  | 5.47 |
| 3 | GHP | HO4 | 9  | PHE | H   | 5.5  | 13 | D4P | H   | 13 | D4P | QG  | 3.86 |
| 3 | GHP | HO4 | 7  | GHP | HA  | 5.5  | 13 | D4P | H   | 14 | GLY | H   | 5.08 |
| 3 | GHP | QD  | 9  | PHE | H   | 5.01 | 13 | D4P | H   | 17 | D4P | QD  | 5.5  |
| 3 | GHP | QD  | 9  | PHE | HA  | 5.45 | 13 | D4P | HA  | 14 | GLY | H   | 3.36 |
| 3 | GHP | QD  | 9  | PHE | HB2 | 4.86 | 13 | D4P | HA  | 14 | GLY | HA2 | 5.45 |

|   |     |     |    |     |     |      |    |     |     |    |     |     |      |
|---|-----|-----|----|-----|-----|------|----|-----|-----|----|-----|-----|------|
| 3 | GHP | QD  | 9  | PHE | HB3 | 4.91 | 13 | D4P | HA  | 14 | GLY | HA3 | 5.45 |
| 3 | GHP | QD  | 10 | ORD | H   | 4.36 | 13 | D4P | HA  | 17 | D4P | QD  | 5.31 |
| 3 | GHP | QD  | 10 | ORD | HB2 | 5.43 | 13 | D4P | HA  | 17 | D4P | QG  | 5.5  |
| 3 | GHP | QD  | 10 | ORD | HB3 | 5.5  | 13 | D4P | QD  | 14 | GLY | H   | 4.63 |
| 3 | GHP | QD  | 10 | ORD | QG  | 5.5  | 13 | D4P | QD  | 14 | GLY | HA2 | 5.5  |
| 3 | GHP | QD  | 11 | D4P | H   | 4.64 | 13 | D4P | QD  | 14 | GLY | HA3 | 5.5  |
| 3 | GHP | QD  | 12 | DTH | H   | 5.01 | 13 | D4P | QD  | 14 | GLY | QA  | 4.81 |
| 3 | GHP | QD  | 5  | DTH | H   | 4.92 | 13 | D4P | QG  | 14 | GLY | H   | 4.59 |
| 3 | GHP | QD  | 7  | GHP | H   | 3.87 | 13 | D4P | QG  | 14 | GLY | QA  | 5.34 |
| 3 | GHP | QD  | 7  | GHP | HA  | 4.77 | 14 | GLY | H   | 15 | LEU | H   | 4.42 |
| 3 | GHP | QD  | 8  | THR | H   | 5.5  | 14 | GLY | H   | 15 | LEU | HA  | 5.5  |
| 3 | GHP | QD  | 8  | THR | QG2 | 5.5  | 14 | GLY | H   | 15 | LEU | QQD | 5.44 |
| 3 | GHP | QG  | 9  | PHE | HB2 | 5.5  | 14 | GLY | H   | 17 | D4P | QD  | 5.34 |
| 3 | GHP | QG  | 13 | D4P | HA  | 5.5  | 14 | GLY | H   | 17 | D4P | QG  | 5.31 |
| 3 | GHP | QG  | 17 | D4P | QD  | 6    | 14 | GLY | HA2 | 15 | LEU | QB  | 5.24 |
| 3 | GHP | QG  | 4  | ORD | H   | 4.43 | 14 | GLY | HA2 | 17 | D4P | QD  | 5.16 |
| 3 | GHP | QG  | 4  | ORD | HA  | 5.5  | 14 | GLY | HA2 | 17 | D4P | QG  | 5.5  |
| 3 | GHP | QG  | 5  | DTH | HA  | 5.5  | 14 | GLY | HA3 | 15 | LEU | QB  | 5.24 |
| 3 | GHP | QG  | 6  | D4P | HA  | 5.49 | 14 | GLY | HA3 | 17 | D4P | QD  | 5.16 |
| 3 | GHP | QG  | 7  | GHP | HA  | 5.5  | 14 | GLY | HA3 | 17 | D4P | QG  | 5.5  |
| 4 | ORD | H   | 13 | D4P | HA  | 4.45 | 14 | GLY | QA  | 15 | LEU | QQD | 5.28 |
| 4 | ORD | H   | 13 | D4P | QG  | 4.65 | 14 | GLY | QA  | 17 | D4P | QD  | 4.54 |
| 4 | ORD | H   | 14 | GLY | H   | 5.46 | 15 | LEU | H   | 15 | LEU | HG  | 4.21 |
| 4 | ORD | H   | 4  | ORD | HB2 | 4.09 | 15 | LEU | H   | 15 | LEU | QB  | 3.54 |
| 4 | ORD | H   | 4  | ORD | QD  | 5.5  | 15 | LEU | H   | 15 | LEU | QD1 | 5.5  |
| 4 | ORD | H   | 5  | DTH | H   | 4.01 | 15 | LEU | H   | 15 | LEU | QD2 | 5.5  |
| 4 | ORD | H   | 5  | DTH | HA  | 5.5  | 15 | LEU | H   | 15 | LEU | QQD | 4.54 |
| 4 | ORD | H   | 5  | DTH | HB  | 5.5  | 15 | LEU | H   | 16 | DAL | H   | 5.35 |
| 4 | ORD | HA  | 13 | D4P | HA  | 5.18 | 15 | LEU | HA  | 15 | LEU | HG  | 4.03 |
| 4 | ORD | HA  | 13 | D4P | QD  | 5.5  | 15 | LEU | HA  | 15 | LEU | QD1 | 4.29 |
| 4 | ORD | HA  | 4  | ORD | QD  | 5.49 | 15 | LEU | HA  | 15 | LEU | QD2 | 4.29 |
| 4 | ORD | HA  | 4  | ORD | QG  | 4.11 | 15 | LEU | HA  | 15 | LEU | QQD | 3.59 |
| 4 | ORD | HB2 | 12 | DTH | H   | 5.5  | 15 | LEU | HA  | 16 | DAL | QB  | 4.56 |
| 4 | ORD | HB2 | 13 | D4P | HA  | 5.48 | 15 | LEU | HA  | 17 | D4P | H   | 5.29 |
| 4 | ORD | HB2 | 13 | D4P | QD  | 4.82 | 15 | LEU | HG  | 16 | DAL | H   | 5.14 |
| 4 | ORD | HB2 | 13 | D4P | QG  | 4.78 | 15 | LEU | QB  | 15 | LEU | QD1 | 4.05 |
| 4 | ORD | HB2 | 4  | ORD | QD  | 4.18 | 15 | LEU | QB  | 15 | LEU | QD2 | 4.05 |
| 4 | ORD | HB2 | 5  | DTH | H   | 4.47 | 15 | LEU | QB  | 16 | DAL | H   | 4.42 |
| 4 | ORD | HB2 | 5  | DTH | HB  | 5.5  | 15 | LEU | QB  | 16 | DAL | HA  | 5.5  |
| 4 | ORD | HB3 | 13 | D4P | HA  | 5.5  | 15 | LEU | QB  | 17 | D4P | H   | 5.5  |
| 4 | ORD | HB3 | 13 | D4P | QD  | 4.87 | 15 | LEU | QD1 | 16 | DAL | H   | 5.5  |
| 4 | ORD | HB3 | 13 | D4P | QG  | 4.75 | 15 | LEU | QD2 | 16 | DAL | H   | 5.5  |
| 4 | ORD | HB3 | 14 | GLY | H   | 5.5  | 15 | LEU | QQD | 16 | DAL | H   | 4.5  |
| 4 | ORD | HB3 | 5  | DTH | H   | 5.5  | 16 | DAL | H   | 16 | DAL | QB  | 3.63 |
| 4 | ORD | QD  | 13 | D4P | QD  | 4.21 | 16 | DAL | H   | 17 | D4P | H   | 4.44 |
| 4 | ORD | QD  | 13 | D4P | QG  | 5.5  | 16 | DAL | HA  | 17 | D4P | QG  | 5.5  |
| 4 | ORD | QD  | 5  | DTH | H   | 5.5  | 16 | DAL | QB  | 17 | D4P | H   | 4.72 |
| 4 | ORD | QD  | 5  | DTH | QG2 | 5.5  | 16 | DAL | QB  | 17 | D4P | HA  | 5.5  |

|   |     |     |    |     |     |      |
|---|-----|-----|----|-----|-----|------|
| 4 | ORD | QG  | 12 | DTH | H   | 5.5  |
| 4 | ORD | QG  | 13 | D4P | HA  | 5.5  |
| 4 | ORD | QG  | 13 | D4P | QD  | 4.68 |
| 4 | ORD | QG  | 13 | D4P | QG  | 5.5  |
| 4 | ORD | QG  | 5  | DTH | H   | 5.5  |
| 4 | ORD | QG  | 5  | DTH | HB  | 5.5  |
| 5 | DTH | H   | 11 | D4P | HA  | 5.5  |
| 5 | DTH | H   | 12 | DTH | H   | 4.27 |
| 5 | DTH | H   | 12 | DTH | QG2 | 5.14 |
| 5 | DTH | H   | 13 | D4P | HA  | 4.98 |
| 5 | DTH | H   | 5  | DTH | QG2 | 4.79 |
| 5 | DTH | H   | 6  | D4P | H   | 4.8  |
| 5 | DTH | HA  | 12 | DTH | H   | 5.5  |
| 5 | DTH | HA  | 5  | DTH | QG2 | 3.53 |
| 5 | DTH | HA  | 6  | D4P | H   | 3.29 |
| 5 | DTH | HA  | 6  | D4P | QD  | 5.5  |
| 5 | DTH | HA  | 6  | D4P | QG  | 4.54 |
| 5 | DTH | HB  | 11 | D4P | QD  | 5.48 |
| 5 | DTH | HB  | 11 | D4P | QG  | 5.39 |
| 5 | DTH | HB  | 12 | DTH | H   | 5.31 |
| 5 | DTH | HB  | 12 | DTH | QG2 | 5.19 |
| 5 | DTH | HB  | 6  | D4P | H   | 4.2  |
| 5 | DTH | HB  | 6  | D4P | QD  | 5.5  |
| 5 | DTH | HB  | 6  | D4P | QG  | 4.74 |
| 5 | DTH | QG2 | 11 | D4P | QD  | 4.97 |
| 5 | DTH | QG2 | 11 | D4P | QG  | 4.48 |
| 5 | DTH | QG2 | 12 | DTH | H   | 5.24 |
| 5 | DTH | QG2 | 6  | D4P | H   | 4.15 |
| 5 | DTH | QG2 | 6  | D4P | QD  | 5.32 |
| 5 | DTH | QG2 | 6  | D4P | QG  | 4.44 |
| 6 | D4P | H   | 11 | D4P | QG  | 5.25 |
| 6 | D4P | H   | 6  | D4P | QD  | 4.69 |
| 6 | D4P | H   | 6  | D4P | QG  | 3.58 |
| 6 | D4P | HA  | 10 | ORD | H   | 5.5  |
| 6 | D4P | HA  | 11 | D4P | H   | 5.5  |
| 6 | D4P | HA  | 11 | D4P | HA  | 3.95 |
| 6 | D4P | HA  | 11 | D4P | QD  | 5.08 |
| 6 | D4P | HA  | 11 | D4P | QG  | 4.42 |
| 6 | D4P | HA  | 12 | DTH | H   | 4.77 |
| 6 | D4P | HA  | 7  | GHP | HA  | 5.5  |
| 6 | D4P | QD  | 7  | GHP | H   | 5.15 |
| 6 | D4P | QG  | 11 | D4P | QG  | 4.17 |
| 6 | D4P | QG  | 12 | DTH | H   | 4.99 |
| 6 | D4P | QG  | 12 | DTH | QG2 | 5.19 |

|                                        |     |     |    |     |    |      |
|----------------------------------------|-----|-----|----|-----|----|------|
| 17                                     | D4P | H   | 17 | D4P | QD | 5.23 |
| 17                                     | D4P | H   | 17 | D4P | QG | 4.34 |
| <b>H bonds upper restraints</b>        |     |     |    |     |    |      |
| 2                                      | DPP | O   | 14 | GLY | H  | 2    |
| 2                                      | DPP | O   | 14 | GLY | N  | 3    |
| 5                                      | DTH | H   | 12 | DTH | O  | 2    |
| 5                                      | DTH | N   | 12 | DTH | O  | 3    |
| 10                                     | ORD | H   | 7  | GHP | O  | 2    |
| 10                                     | ORD | N   | 7  | GHP | O  | 3    |
| <b>H bonds lower restraints</b>        |     |     |    |     |    |      |
| 3                                      | DPP | O   | 15 | GLY | N  | 2.7  |
| 6                                      | DTH | O   | 13 | DTH | N  | 2.7  |
| 11                                     | ORD | O   | 8  | GHP | N  | 2.7  |
| <b>Cyclic peptide upper restraints</b> |     |     |    |     |    |      |
| 2                                      | DPP | NG  | 17 | D4P | C  | 1.33 |
| 2                                      | DPP | HG1 | 17 | D4P | C  | 2    |
| 2                                      | DPP | CB  | 17 | D4P | C  | 2.43 |
| 2                                      | DPP | NG  | 17 | D4P | CA | 2.43 |
| 2                                      | DPP | NG  | 17 | D4P | O  | 2.25 |
| 2                                      | DPP | HG1 | 17 | D4P | O  | 3.1  |
| <b>cyclic peptide lower restraints</b> |     |     |    |     |    |      |
| 3                                      | DPP | NG  | 18 | D4P | C  | 1.33 |
| 3                                      | DPP | HG1 | 18 | D4P | C  | 2    |
| 3                                      | DPP | CB  | 18 | D4P | C  | 2.43 |
| 3                                      | DPP | NG  | 18 | D4P | CA | 2.43 |
| 3                                      | DPP | NG  | 18 | D4P | O  | 2.25 |

Pseudoatom definitions of the non-canonical amino acids:

QG is for the ortho pair ie H2/H6 for D4P and HC2/H6 for GHP.

QD is for the meta pair ie H3/H5 for D4P and H3/H5 for GHP.

Lipid pseudoatoms are QA, QB, QG, QD, QE along the chain as expected.

**Table S4.** Summary of the antimicrobial activity.

|              | MW<br>(HCl salt) | MSSA (uM) | MSSA (ug/<br>mL) | MRSA (uM) | MRSA (ug/<br>mL) | VISA (uM) | VISA (ug/<br>mL) |
|--------------|------------------|-----------|------------------|-----------|------------------|-----------|------------------|
| <b>Van</b>   | 1485.71          | 1         | 1.5              | 1         | 1.5              | 8         | 11.9             |
| <b>RA2</b>   | 2554.1           | 1         | 2.6              | 1         | 2.6              | 1         | 2.6              |
| <b>RAgly</b> | 2373.9           | 0.5       | 1.2              | 0.5       | 1.2              | 1         | 2.5              |
| <b>8</b>     | 2339.9           | 2         | 4.7              | 2         | 4.7              | 4         | 9.4              |
| <b>8(Cl)</b> | 2455.9           | 2         | 4.7              | 2         | 4.7              | 4         | 9.5              |
| <b>11</b>    | 2246.9           | 1         | 2.2              | 1         | 2.2              | 2         | 4.5              |
| <b>12</b>    | 2230.9           | 4         | 8.9              | 2         | 4.5              | 4         | 8.9              |
| <b>13</b>    | 2248.9           | >16       |                  | >16       |                  | >16       |                  |
| <b>14</b>    | 2245.9           | >16       |                  | >16       |                  | >16       |                  |

## Supplementary Figures

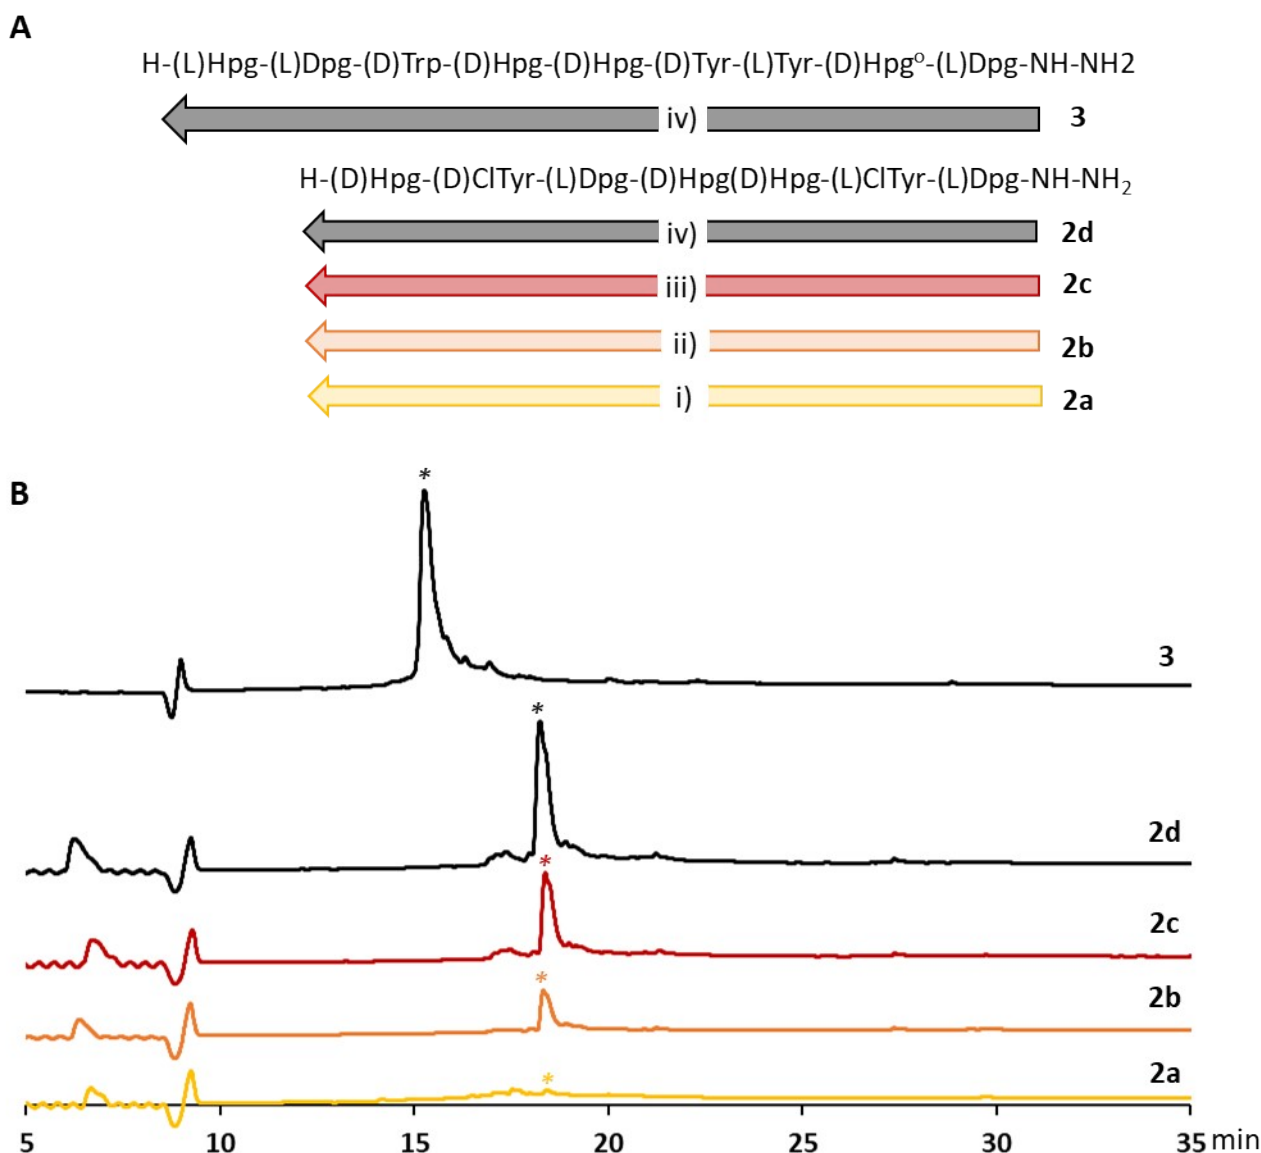

**Figure S1.** Optimization of the SPPS targeting linear GPA peptide precursors in link with Table 1. **(A)** SPPS optimization of the teicoplanin precursor (**2a-d**) and its application to the corbomycin precursor (**3**); **(B)** RP-HPLC chromatogram at 214nm of the crude peptides. The Fmoc removal is identical in every SPPS: DBU/ DMF (v/ v'; 1: 99), 3 x 30s, RT. The coupling condition was modified as following: i) Fmoc-AA-OH (3eq), COMU (3eq), 1,5-lutidine (3eq), DMF, 30min, RT (yellow color); ii) Fmoc-AA-OH (3eq), DIC (3eq), Oxyma (6eq), DMF, 30min, RT (orange color); iii) Fmoc-AA-OH (3eq), DIC (3eq), Oxyma (6eq), DMF, 30min, 50°C – conventional heating (red color); iv) Fmoc-AA-OH (3eq), DIC (3eq), Oxyma (6eq), DMF, 30min, 50°C (30w) – microwave heating (black color). <sup>o</sup>The original sequence has a D-Dpg at this position.

**A**

H-(D)Asp-(D)Phe-(D)Hpg-(L)Dpg-(D)Val-(L)Dpg-(D)Hpg-(L)Dpg-(D)Hpg-(L)Dpg-(D)Val)-(L)Dpg-(L)Hpg-NH<sub>2</sub>

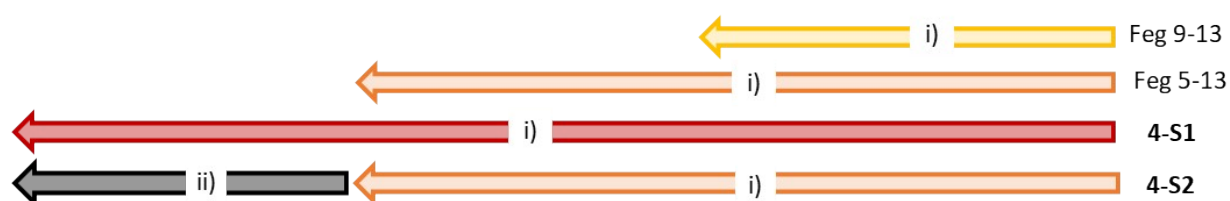**B**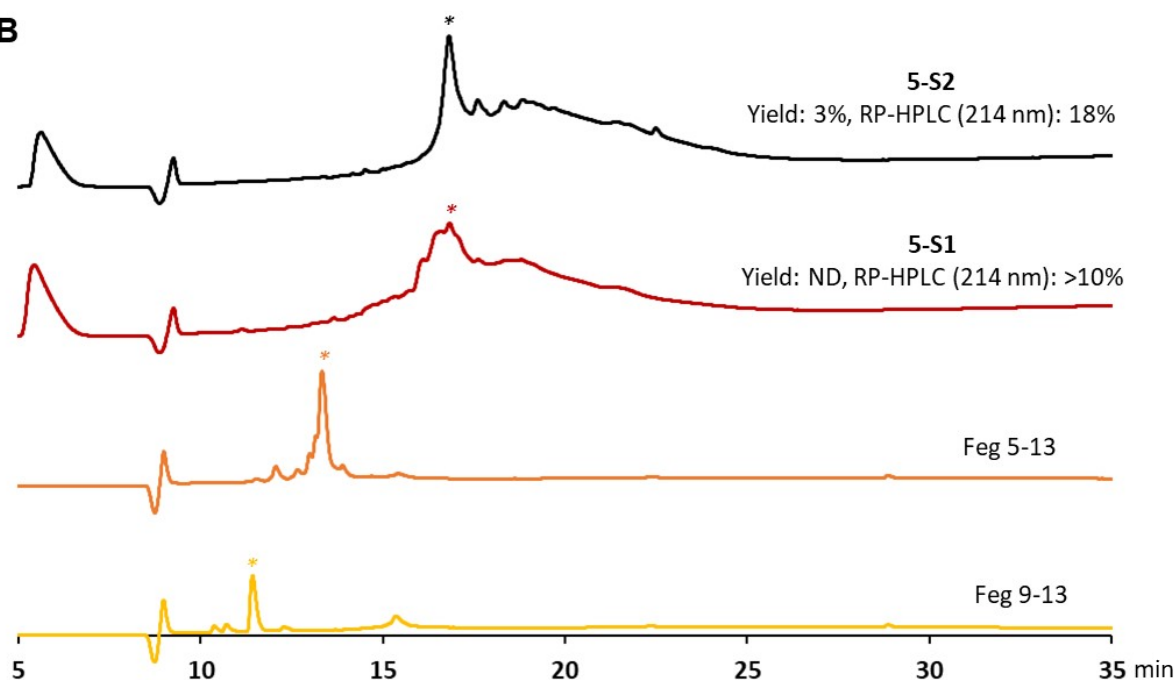

**Figure S2.** Optimization of the SPPS targeting linear retro-inverso feglymycin variant (**4**). **(A)** SPPS monitoring Feg 9-13 and 5-13) and optimization (**4-S1-2**); **(B)** RP-HPLC chromatogram at 214nm of the crude peptides. The Fmoc removal is identical in every SPPS: DBU/ DMF (v/ v'; 1: 99), 3 x 30s, RT. The coupling condition was modified as following: i) Single coupling, Fmoc-AA-OH (3eq), DIC (3eq), Oxyma (6eq), DMF, 30min, 50°C – conventional heating; ii) Double coupling, Fmoc-AA-OH (3eq), DIC (3eq), Oxyma (6eq), DMF, 30min, 50°C – conventional heating.

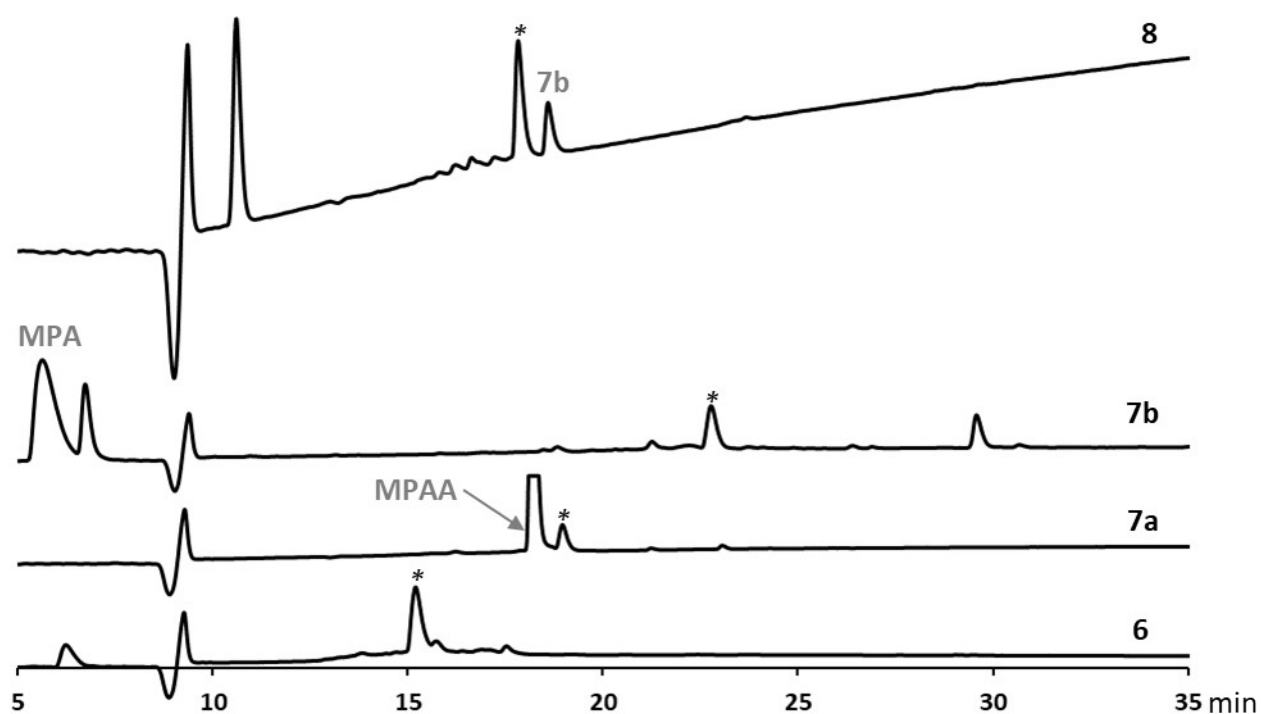

**Figure S3.** Ramoplanin aglycone by intramolecular native chemical ligation followed by desulfurization. RP-HPLC chromatogram at 214nm of the linear precursor **6**, the monitoring of the cyclization (**7a-b**) by NCL using MPAA and MPA and the desulfurization (4h) leading to **8**.

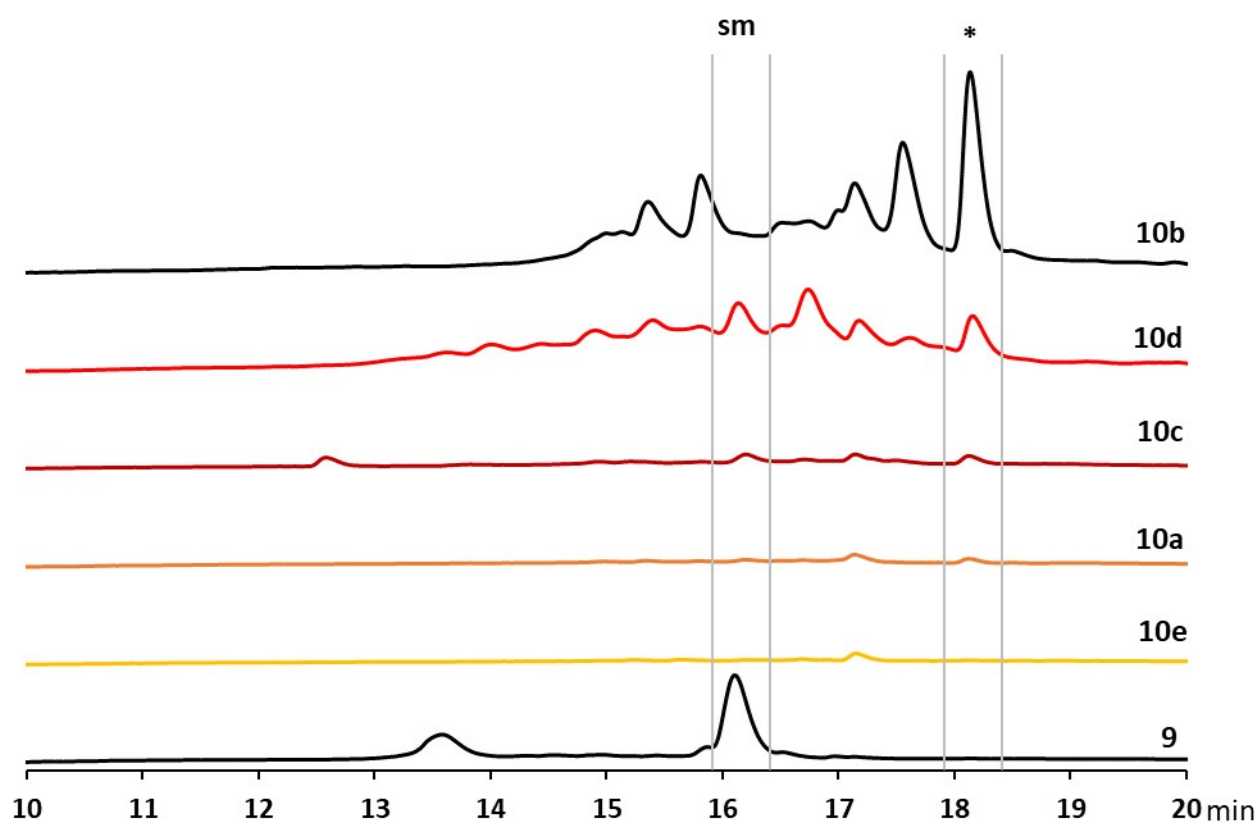

**Supplementary Figure 4.** Ramoplanin aglycone by head-to-tail macrocyclization. RP-HPLC chromatogram at 214nm of the linear precursor **9**, the monitoring of the cyclization after 15hrs.

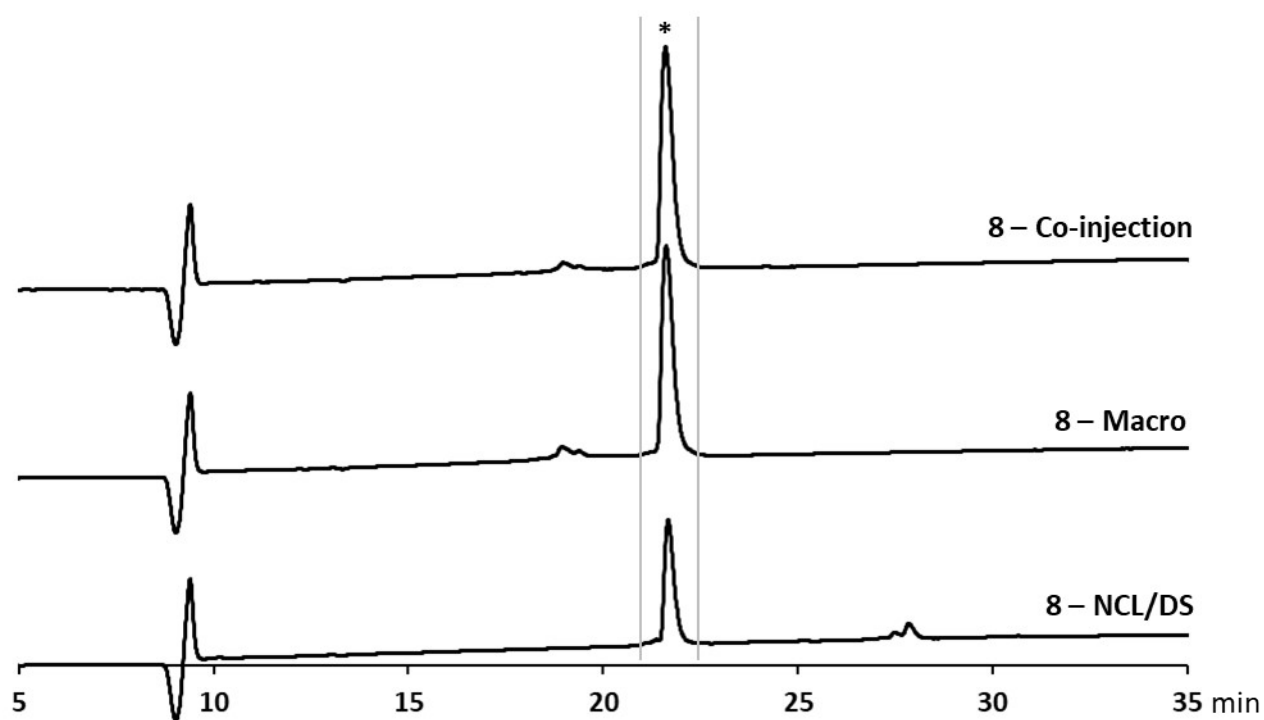

**Figure S5.** Co-injection of the compounds obtained by NCL/ desulfurization and head-to-tail cyclization. RP-HPLC chromatogram at 214nm showing that both products are identical.

H bonds (Å):

DPP (O) GLY14 (H): 2.00  
DPP (O) GLY14 (N): 3.00  
GHP7 (O) ORD10 (H): 2.00  
GHP7 (O) ORD10 (N): 3.00  
DTH5 (H) DTH12 (O): 2.00  
DTH5 (N) DTH12 (O): 3.00

Trans amide linker upper limit restraints:

Scaled x5 in CYANA

DPP (NG) D4P17 (C): 1.33  
DPP (HG1) D4P17 (C): 2.00  
DPP (CB) D4P17 (C): 2.43  
DPP (NG) D4P17 (CA): 2.43  
DPP (NG) D4P17 (O): 2.25  
DPP (HG1) D4P17 (O): 3.1

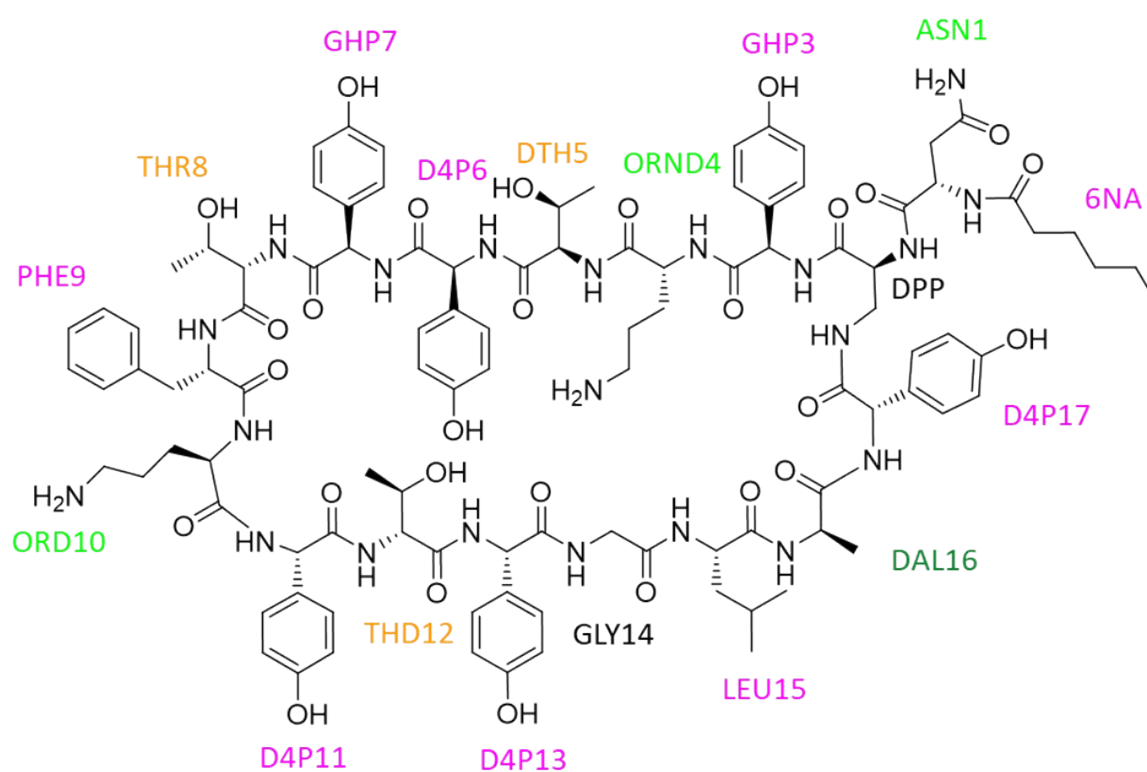

Amide temperature coefficients (-ppb/k) bold values:

|                         |                    |
|-------------------------|--------------------|
| ASN1: 8.12              | ORD10: <b>1.80</b> |
| DPP: <b>0.92, 2.832</b> | D4P11: 8.41        |
| GHP3: 10.40             | DTH12: 9.73        |
| ORD4: 8.33              | D4P13: 9.13        |
| DTH5: <b>2.68</b>       | GLY14: <b>0.06</b> |
| D4P6: 9.94              | LEU15: 10.82       |
| GHP7: 9.39              | DAL16: 11.16       |
| THR8: 4.68              | D4P17: 1.3         |
| PHE9: 5.16              |                    |

**Figure S6.** Amino acid naming used in NMR data analysis and additional data collected other than NOEs supplemented in Table S3.

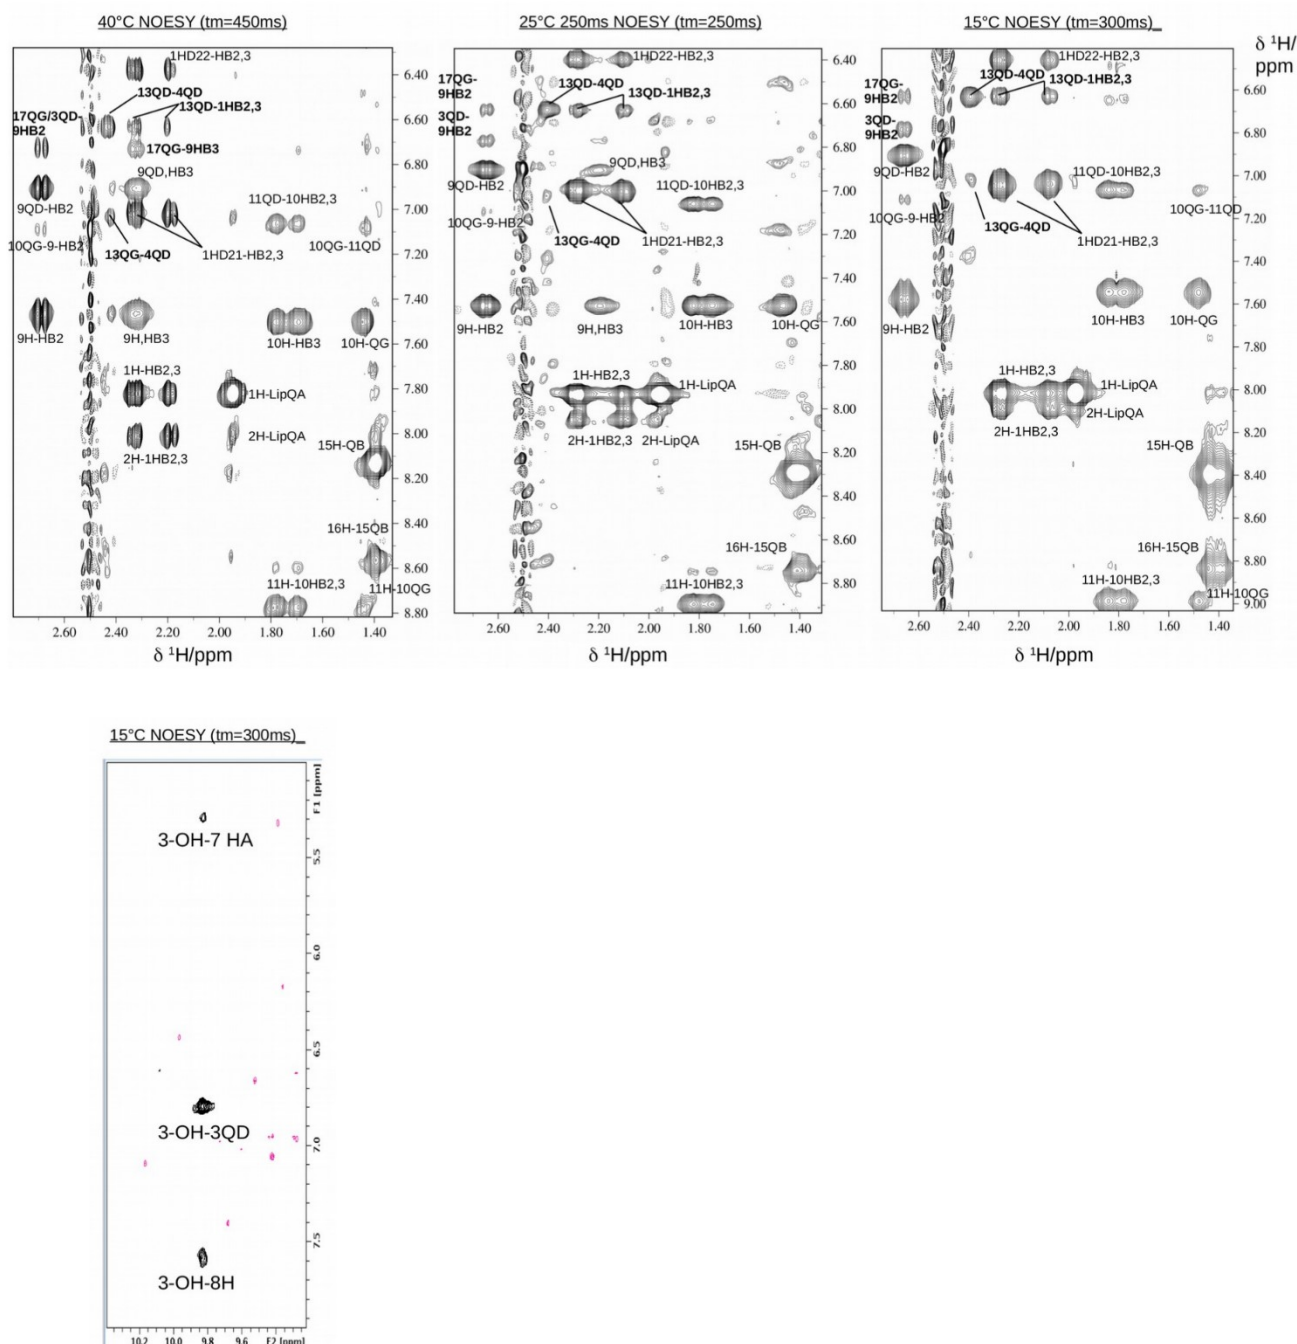

**Figure S7.** Region of 2D NOESY spectra recorded at different temperatures. It is showing the quality of the data and the identification of some long-range NOEs (in bold) between the sidechains of residues D-Hpg3, Hpg17 and Phe9 in the hydrophobic core and between the sidechains of Hpg13 and D-Orn4 and also between Hpg13 and Asn1 across the sheet. NOEs were observed between the broadened OH of D-Hpg3 to the backbone of HN of Thr8 and to the HA of D-Hpg7 are shown in the bottom spectrum.

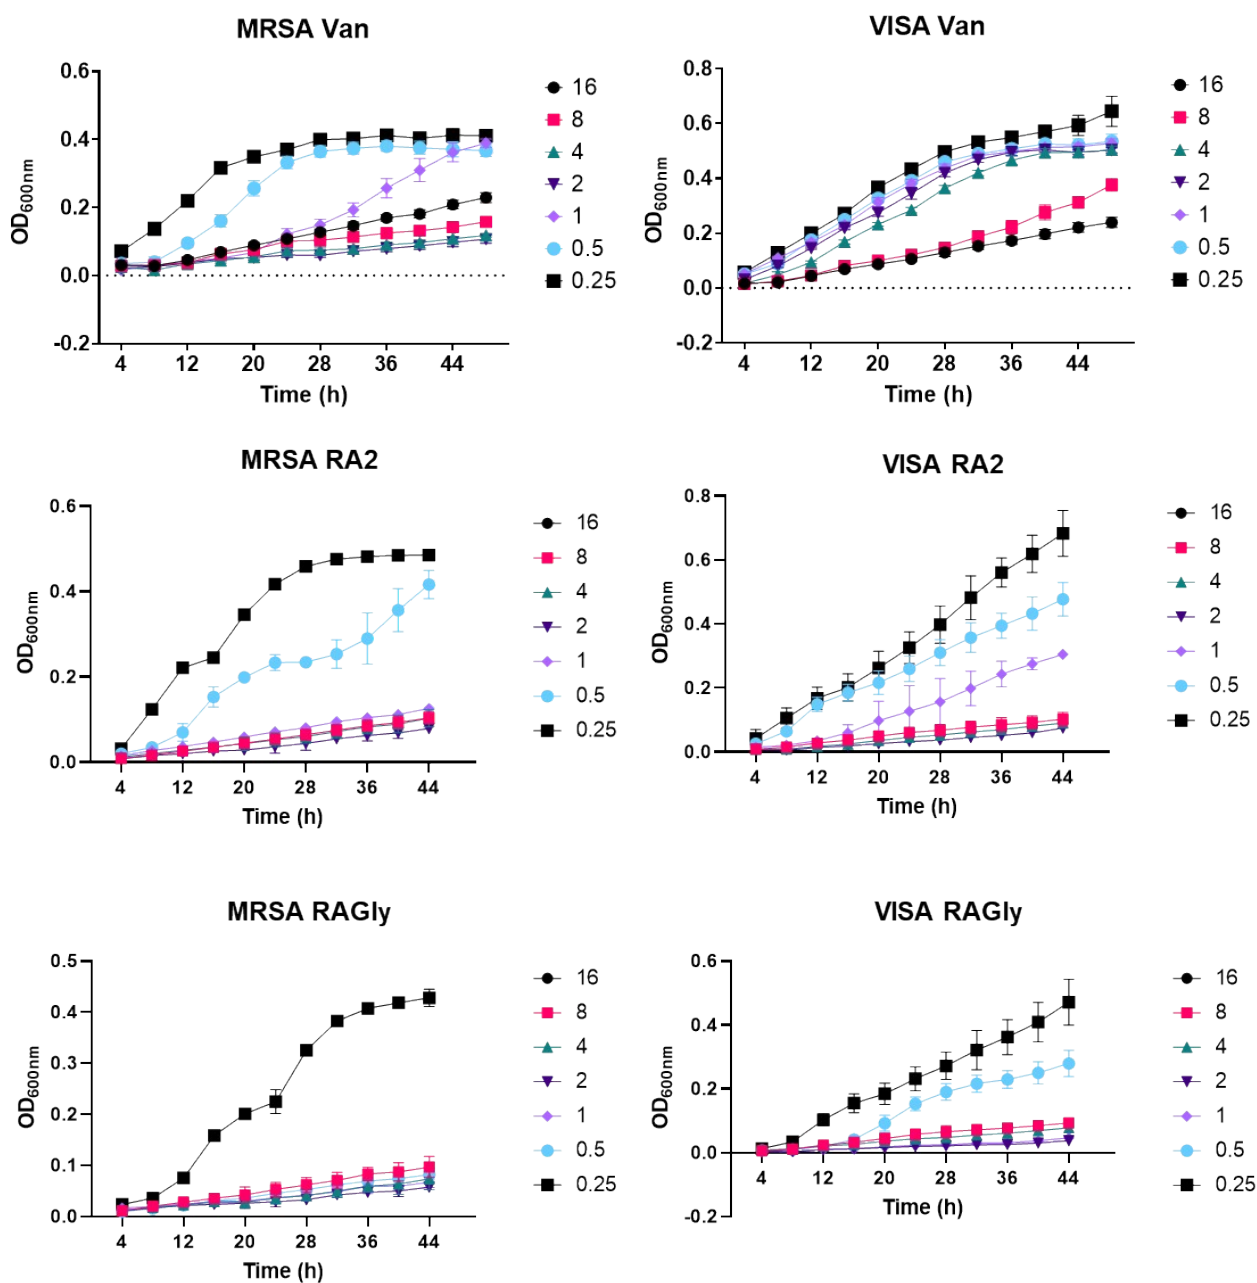

**Figure S8.** The growth of the clinical isolates MRSA and VISA at 6 concentrations of the 3 controls **Van**, **RA2** and **RAGly** determined by OD<sub>600nm</sub> monitoring.

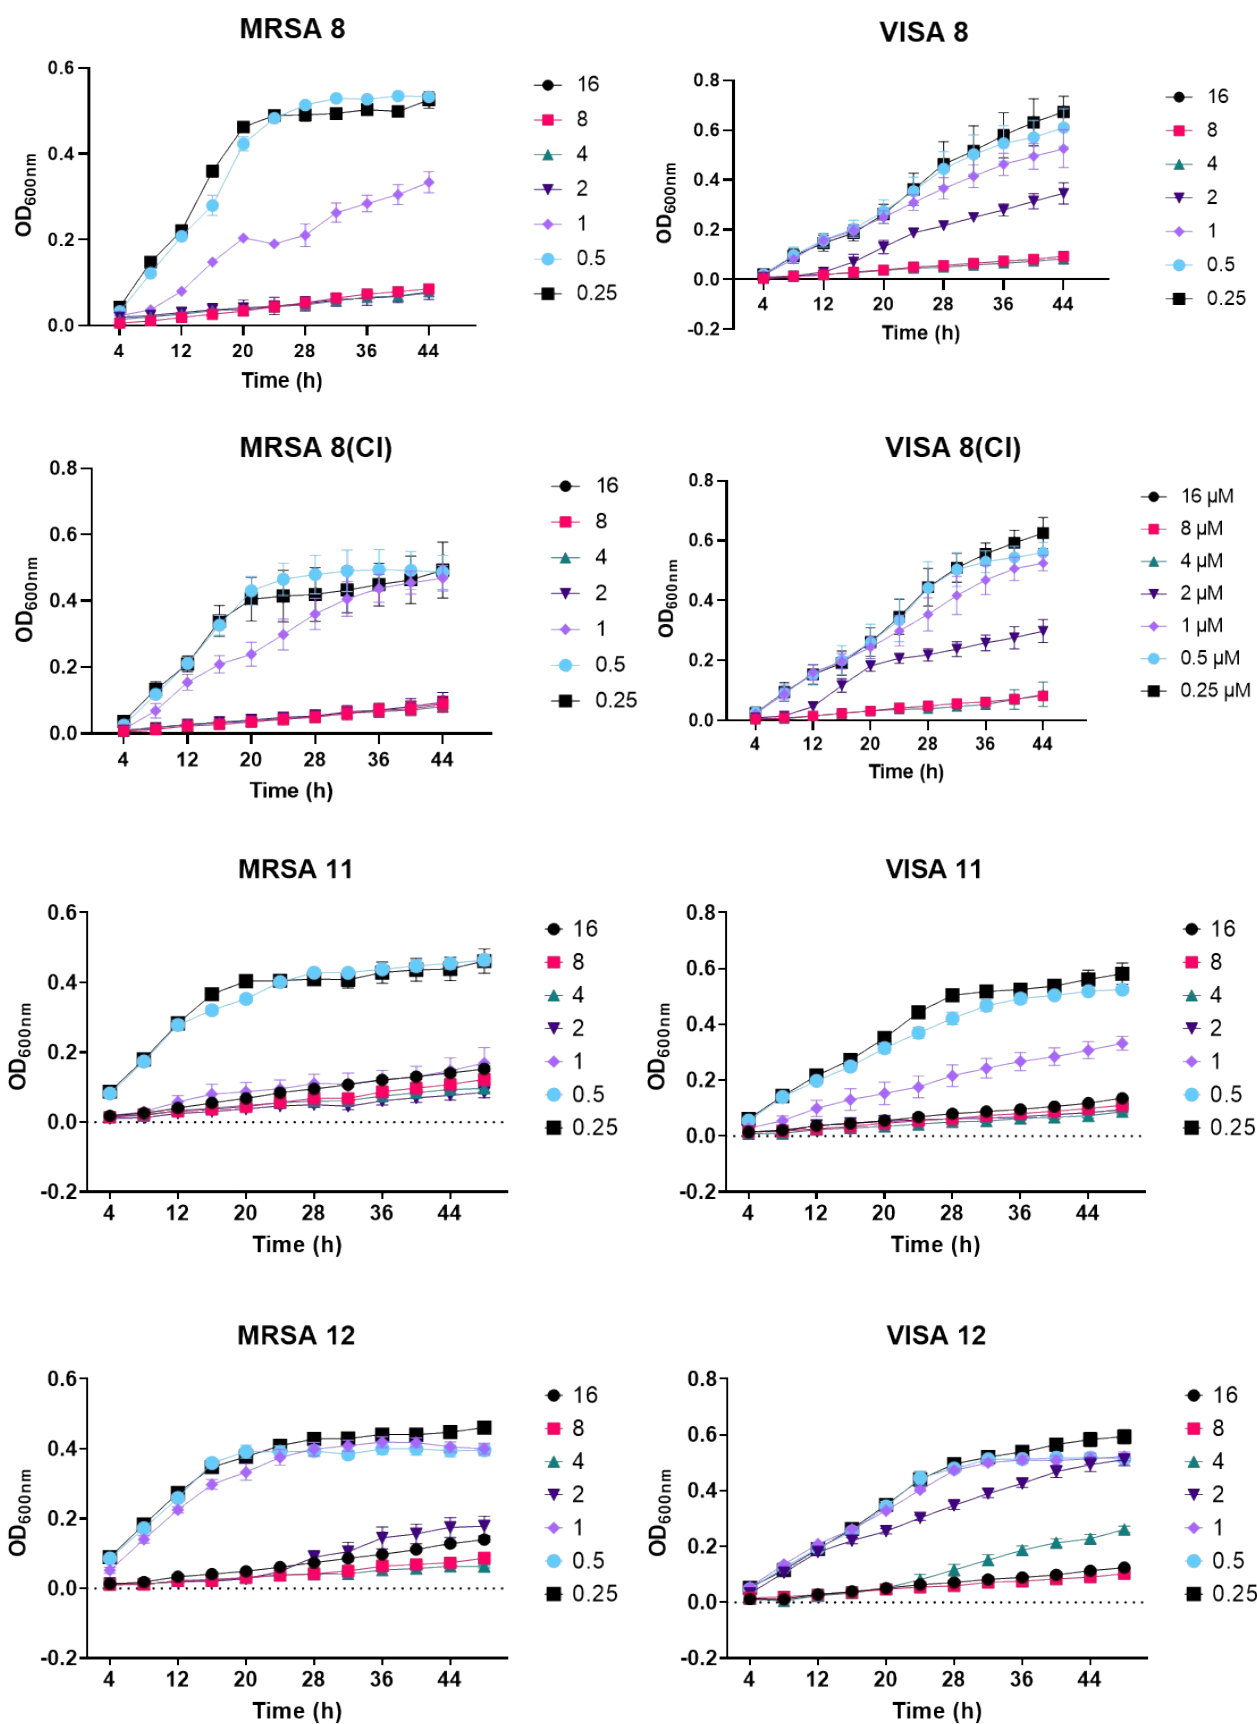

**Figure S9.** The growth of the clinical isolates MRSA and VISA at 6 concentrations of the 4 bioactive synthetic ramoplanin **8**, **8(CI)**, **11** and **12** determined by OD<sub>600nm</sub> monitoring.

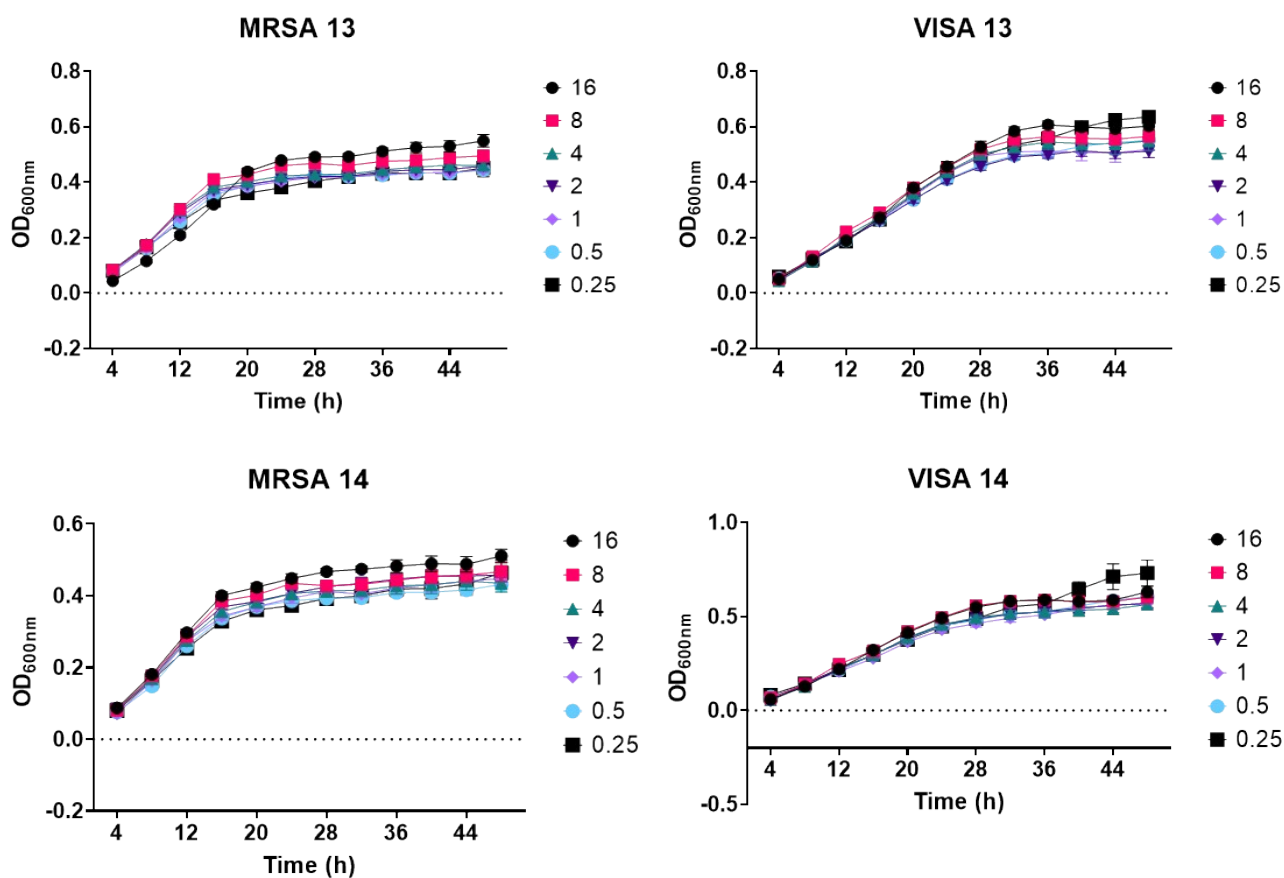

**Figure S10.** The growth of the clinical isolates MRSA and VISA at 6 concentrations of the 2 inactive synthetic ramoplanin **13** and **14** determined by OD<sub>600nm</sub> monitoring.

## Compound characterizations

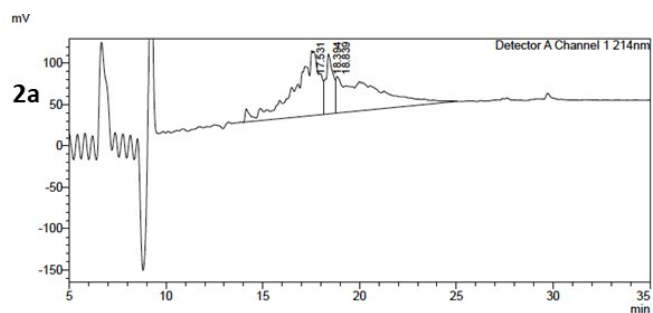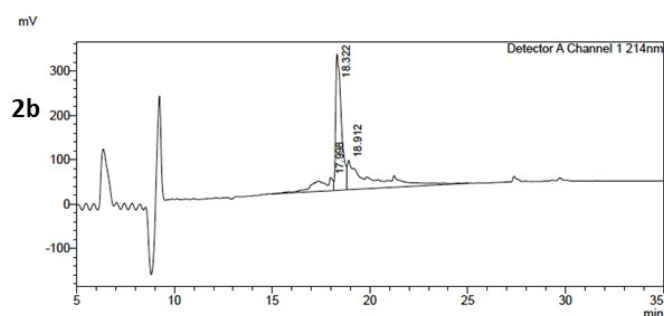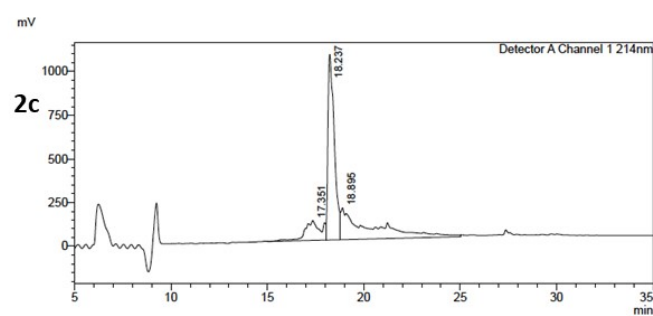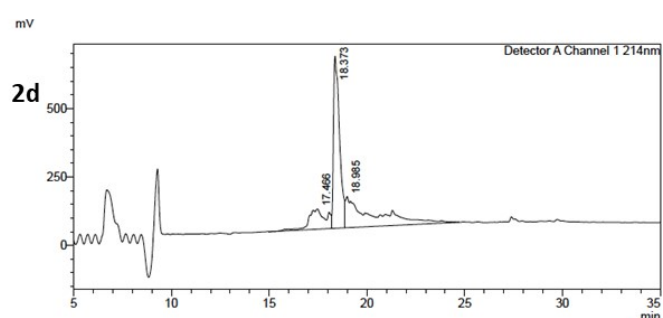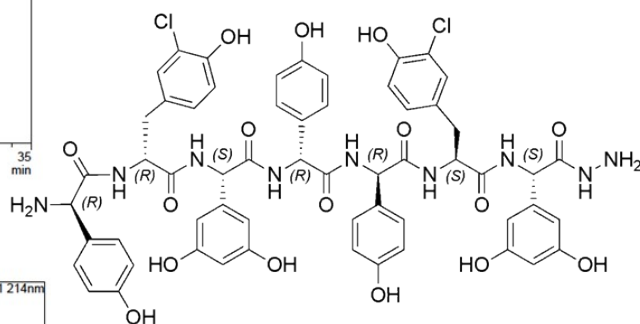

Chemical Formula:  $C_{58}H_{55}Cl_2N_9O_{16}$

Exact Mass: 1203.31

Molecular Weight: 1205.03

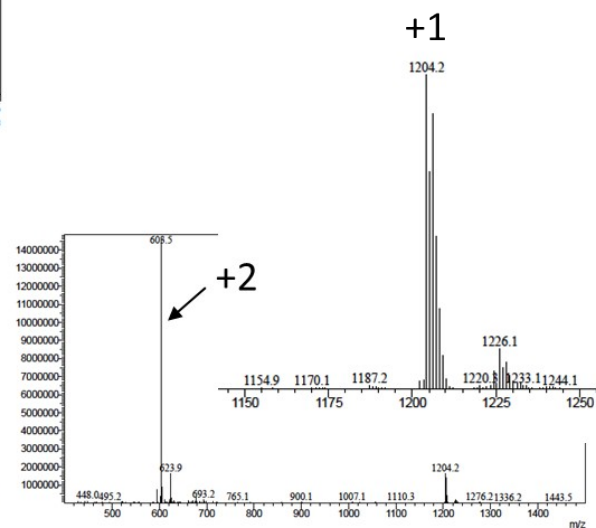

### Compound characterizations

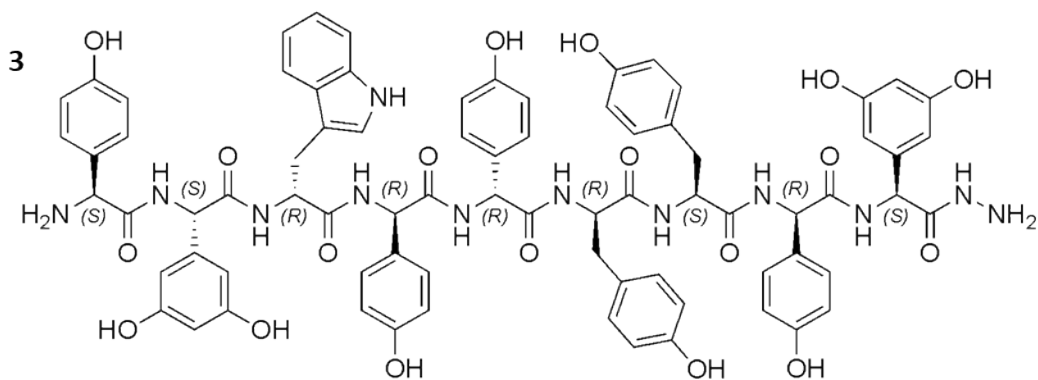

Chemical Formula:  $C_{77}H_{74}N_{12}O_{19}$

Exact Mass: 1470.52

Molecular Weight: 1471.50

#### <Chromatogram>

mV

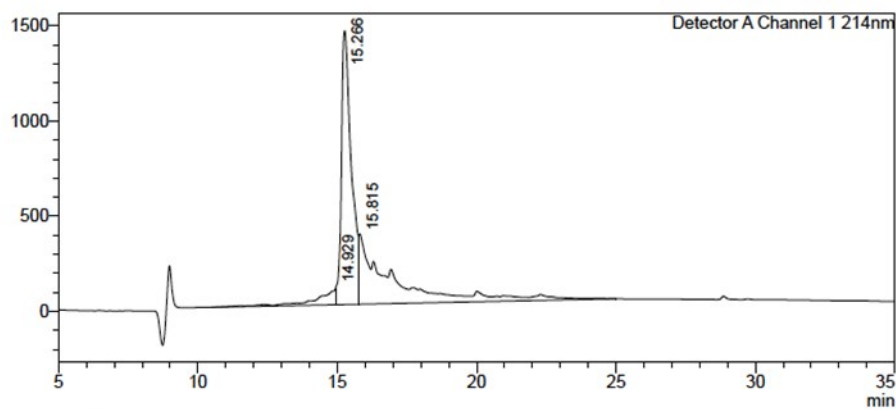

#### <Spectrum>

Line#: 1 R.Time: (Scan#: )  
MassPeaks: 1701  
RawMode: Averaged 15.033-15.800(903-949) BasePeak: 736.7(9270510)  
BG Mode: None Segment 1 - Event 1

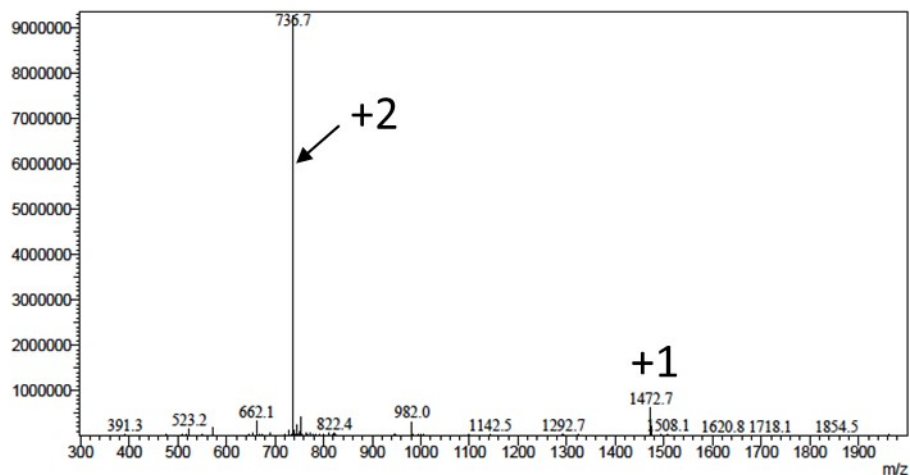

## Compound characterizations

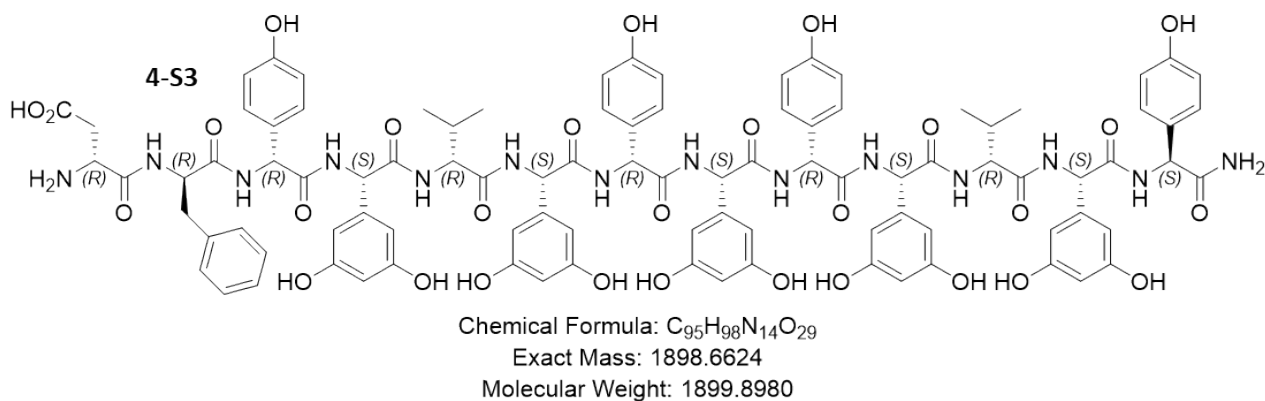

### <Chromatogram>

mV

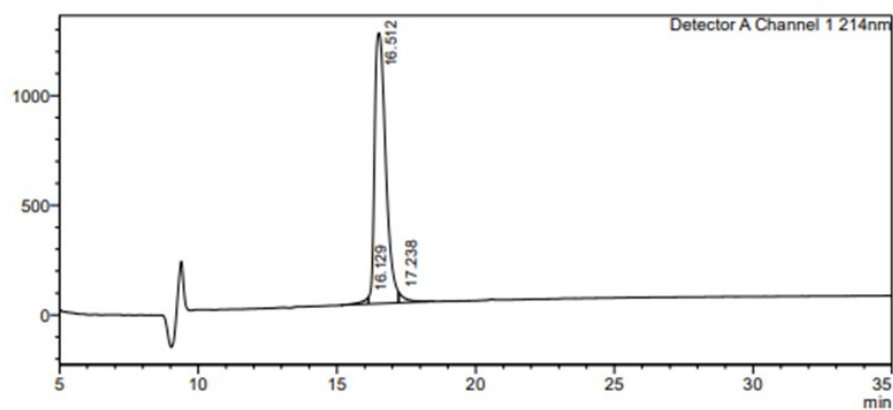

### <Spectrum>

Line# 1 R.Time: 16.633 (Scan#: 999)  
 MassPeaks: 2042  
 RawMode: Single 16.633 (999) BasePeak: 950.8 (10375043)  
 BG Mode: None Segment 1 - Event 1

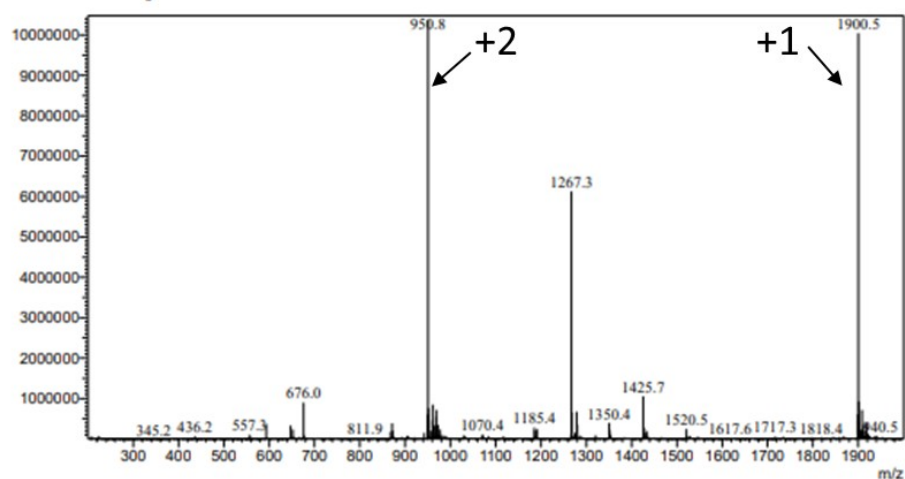

Proton NMR of Feglymycin (4-S3) retro inverse, recorded in d6-DMSO (calibrated to DMSO residual).

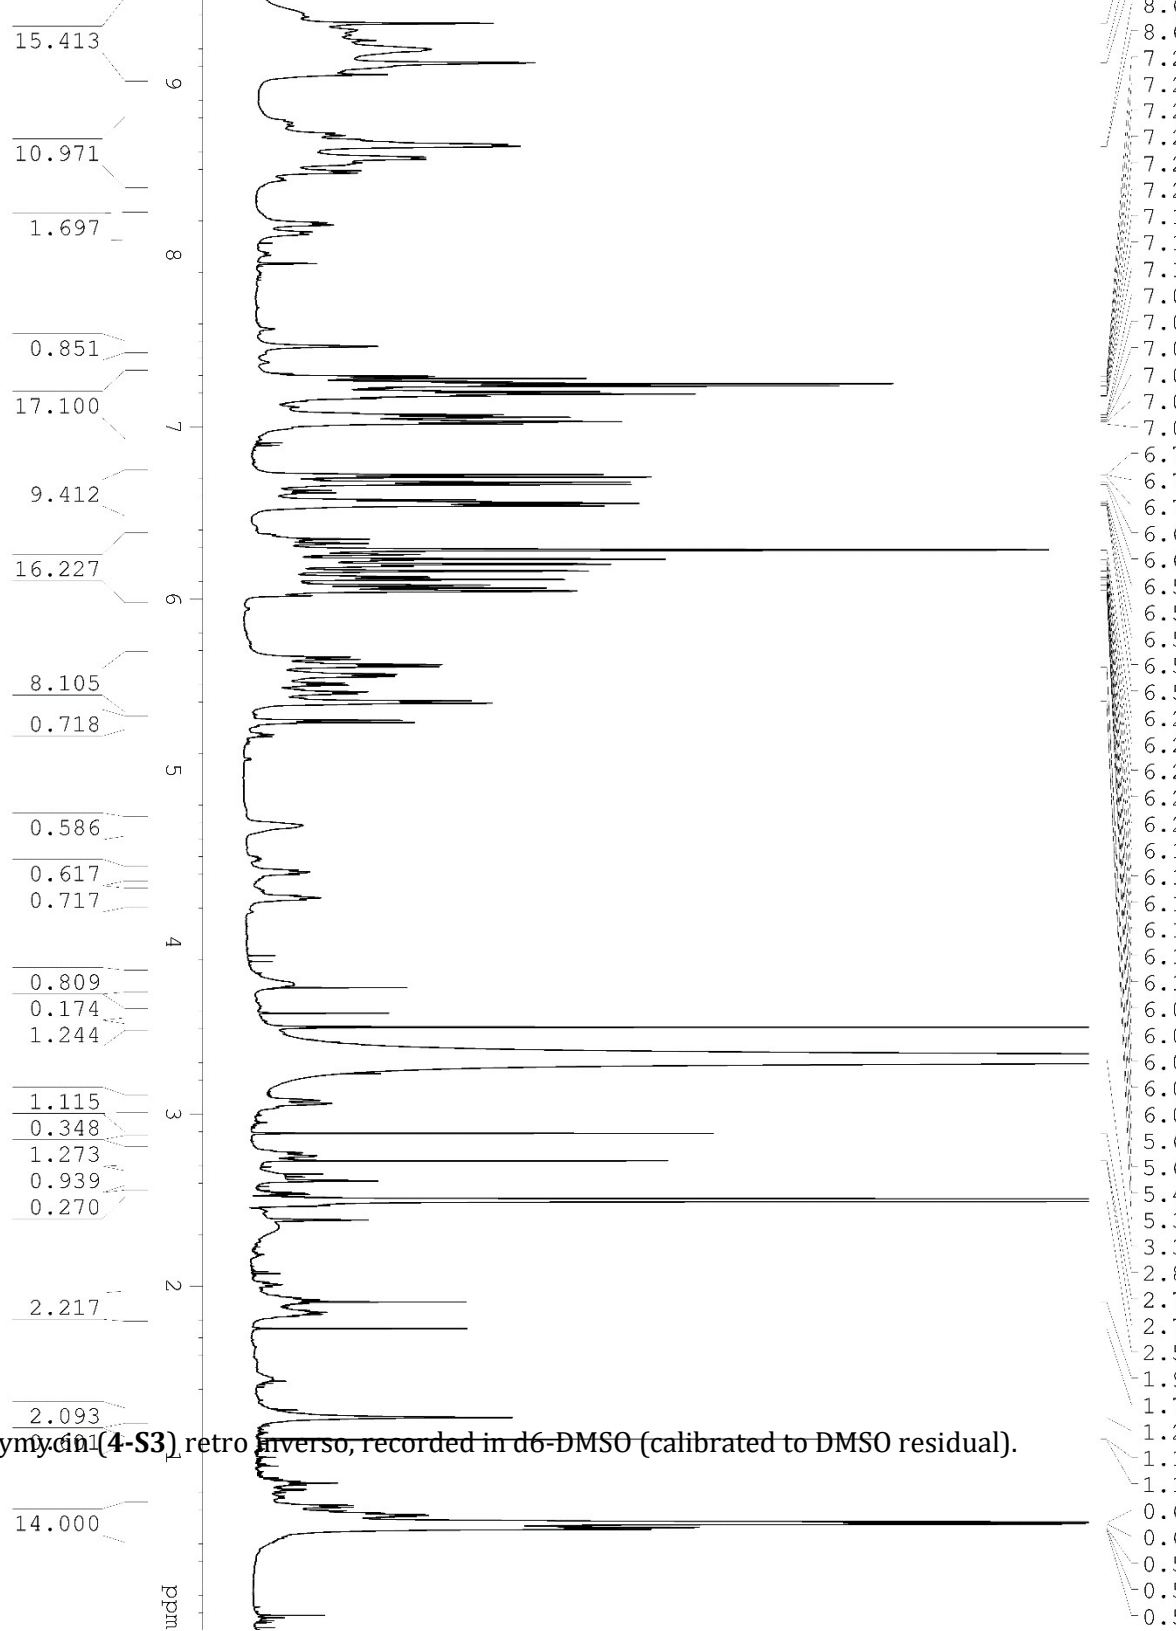

## Compound characterizations

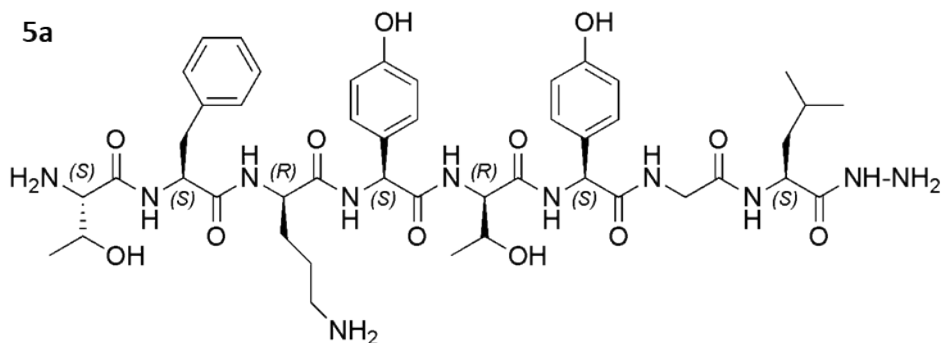

Chemical Formula:  $C_{46}H_{65}N_{11}O_{12}$

Exact Mass: 963.48

Molecular Weight: 964.09

### <Chromatogram>

mV

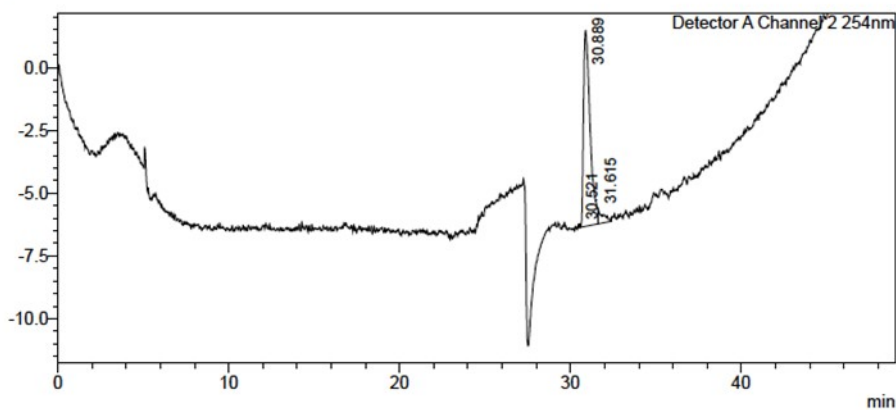

Detector A Channel 2 254nm

| Peak# | Ret. Time | Area   | Height | Conc   | Unit | Mark | Name | Area%   |
|-------|-----------|--------|--------|--------|------|------|------|---------|
| 1     | 30.521    | 541    | 129    | 0.247  |      | M    |      | 0.247   |
| 2     | 30.889    | 206370 | 7791   | 94.029 |      | VM   |      | 94.029  |
| 3     | 31.615    | 12564  | 603    | 5.725  |      | VM   |      | 5.725   |
| Total |           | 219475 | 8523   |        |      |      |      | 100.000 |

### <Spectrum>

Line#:1 R.Time:—(Scan#:—)  
 MassPeaks:1751  
 RawMode:Averaged 30.467-31.600(1829-1897) BasePeak:483.0(4632200)  
 BG Mode:None Segment 1 - Event 1

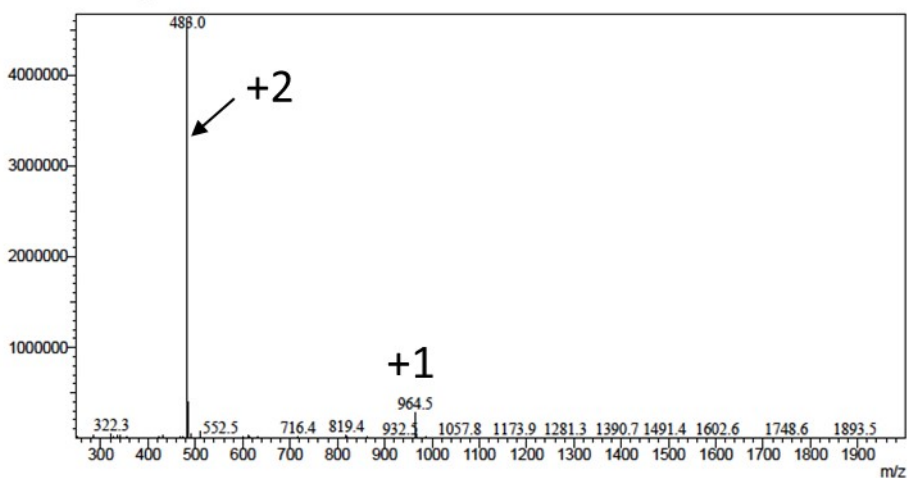

## Compound characterizations

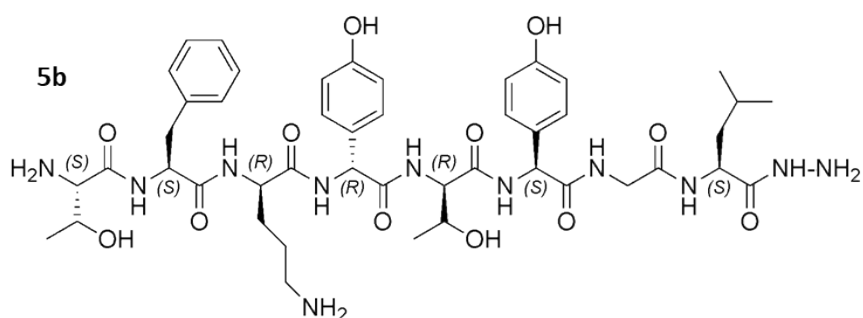

### <Chromatogram>

mV

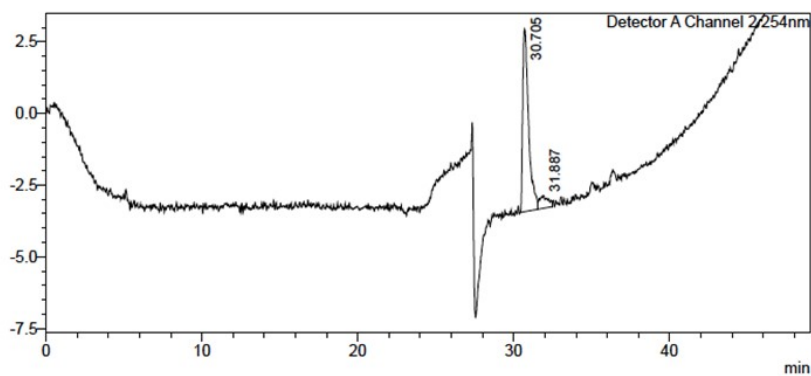

Detector A Channel 2 254nm

Peak Table

| Peak# | Ret. Time | Area   | Height | Conc.  | Unit | Mark | Name | Area%   |
|-------|-----------|--------|--------|--------|------|------|------|---------|
| 1     | 30.705    | 166521 | 6365   | 90.481 |      | M    |      | 90.481  |
| 2     | 31.887    | 17518  | 447    | 9.519  |      | V M  |      | 9.519   |
| Total |           | 184039 | 6812   |        |      |      |      | 100.000 |

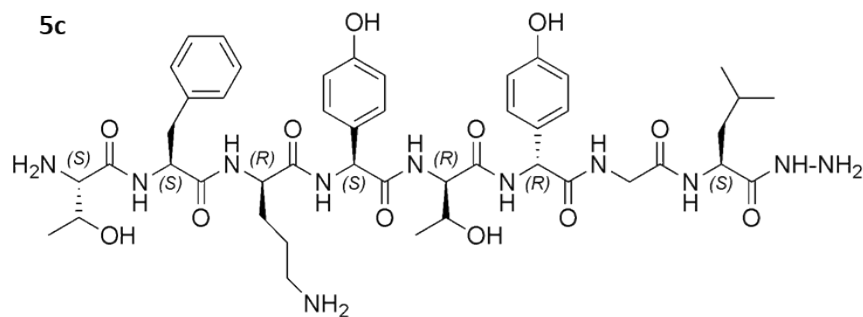

### <Chromatogram>

mV

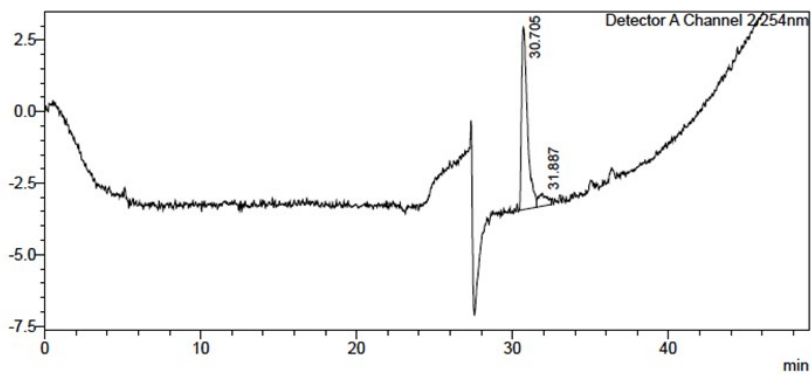

Detector A Channel 2 254nm

Peak Table

| Peak# | Ret. Time | Area   | Height | Conc.  | Unit | Mark | Name | Area%   |
|-------|-----------|--------|--------|--------|------|------|------|---------|
| 1     | 30.705    | 166521 | 6365   | 90.481 |      | M    |      | 90.481  |
| 2     | 31.887    | 17518  | 447    | 9.519  |      | V M  |      | 9.519   |
| Total |           | 184039 | 6812   |        |      |      |      | 100.000 |

## Compound characterizations

5d

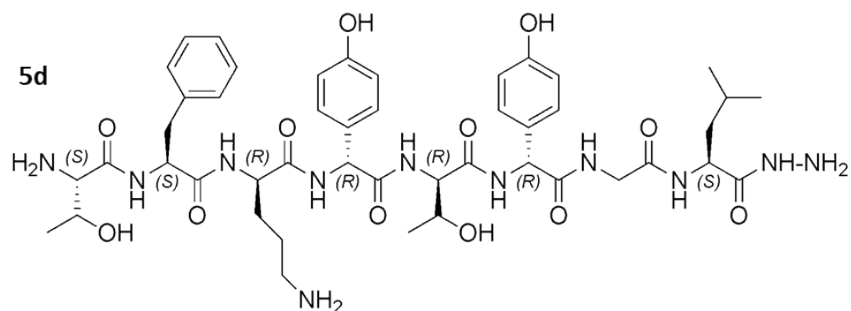

<Chromatogram>

mV

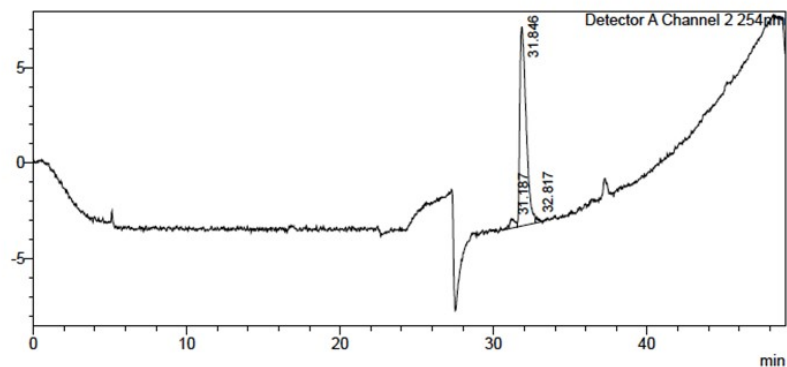

Detector A Channel 2 254nm

| Peak# | Ret. Time | Area   | Height | Conc   | Unit | Mark | Name | Area%   |
|-------|-----------|--------|--------|--------|------|------|------|---------|
| 1     | 31.187    | 12603  | 471    | 4.052  |      | M    |      | 4.052   |
| 2     | 31.846    | 295159 | 10408  | 94.906 |      | VM   |      | 94.906  |
| 3     | 32.817    | 3741   | 302    | 1.042  |      | VM   |      | 1.042   |
| Total |           | 311003 | 11182  |        |      |      |      | 100.000 |

5a-d

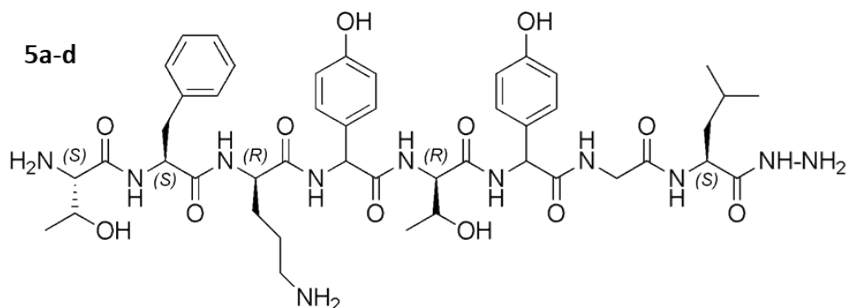

<Chromatogram>

mV

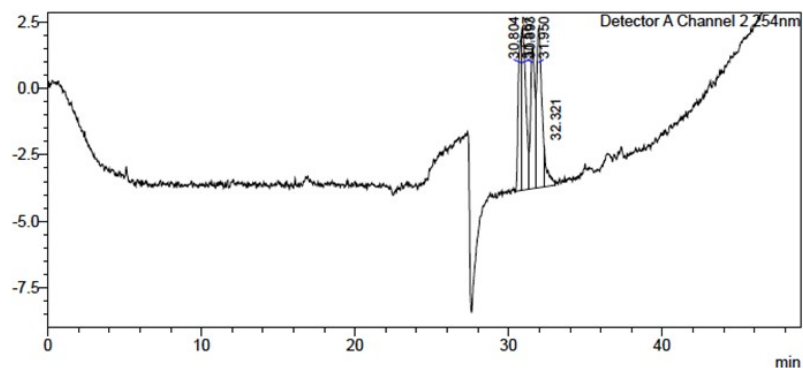

Detector A Channel 2 254nm

| Peak# | Ret. Time | Area   | Height | Conc   | Unit | Mark | Name | Area%   |
|-------|-----------|--------|--------|--------|------|------|------|---------|
| 1     | 30.804    | 69667  | 5718   | 15.358 |      | M    |      | 15.358  |
| 2     | 30.893    | 126847 | 6086   | 27.964 |      | VM   |      | 27.964  |
| 3     | 31.567    | 100938 | 5340   | 22.256 |      | VM   |      | 22.256  |
| 4     | 31.950    | 136524 | 5960   | 30.097 |      | VM   |      | 30.097  |
| 5     | 32.321    | 19617  | 1515   | 4.325  |      | VM   |      | 4.325   |
| Total |           | 453614 | 24619  |        |      |      |      | 100.000 |

## Compound characterizations

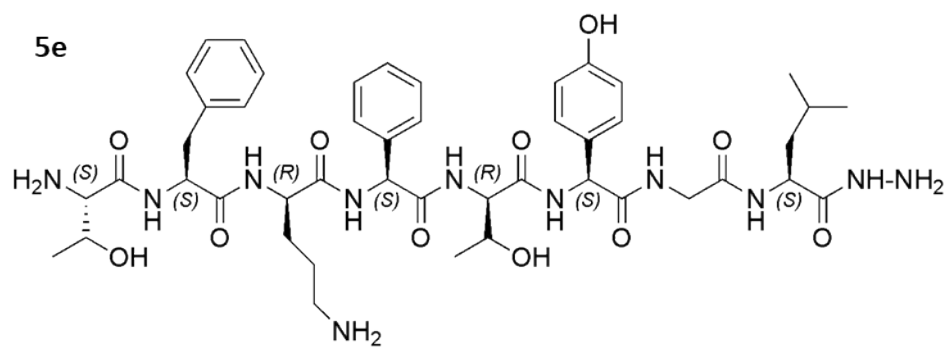

Chemical Formula:  $C_{46}H_{65}N_{11}O_{11}$

Exact Mass: 947.4865

Molecular Weight: 948.0920

### <Chromatogram>

mV

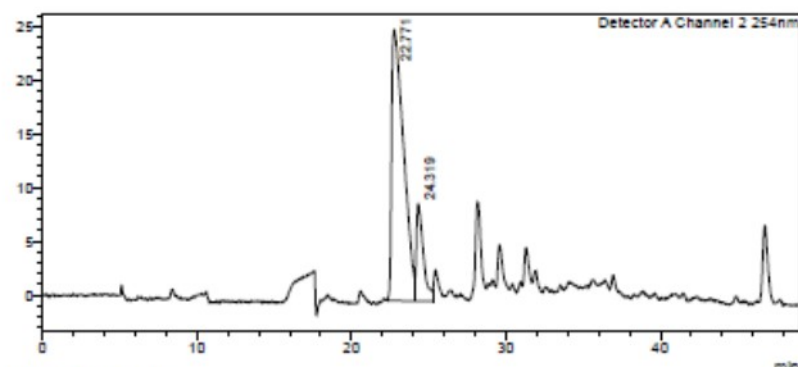

| Peak# | Ret. Time | Area    | Height | Cons   | Unit | Mark | Name | Area%   |
|-------|-----------|---------|--------|--------|------|------|------|---------|
| 1     | 22.771    | 1353475 | 25187  | 82.703 |      | M    |      | 82.703  |
| 2     | 24.319    | 283079  | 9041   | 17.297 |      | VM   |      | 17.297  |
| Total |           | 1636553 | 34228  |        |      |      |      | 100.000 |

### <Spectrum>

Line#1 R.Time:—(Scan#—)

MassPeaks:1751

RawMode:Averaged 22.633-24.933(1359-1497) BasePeak:475.1(15962579)

BG Mode:None Segment 1 - Event 1

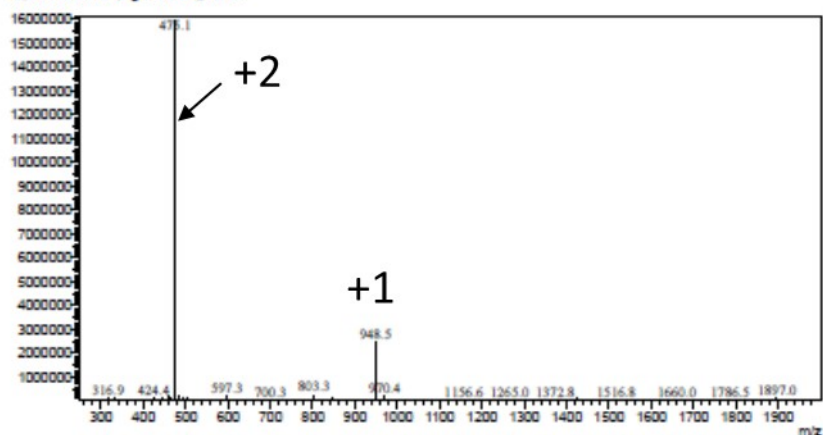

## Compound characterizations

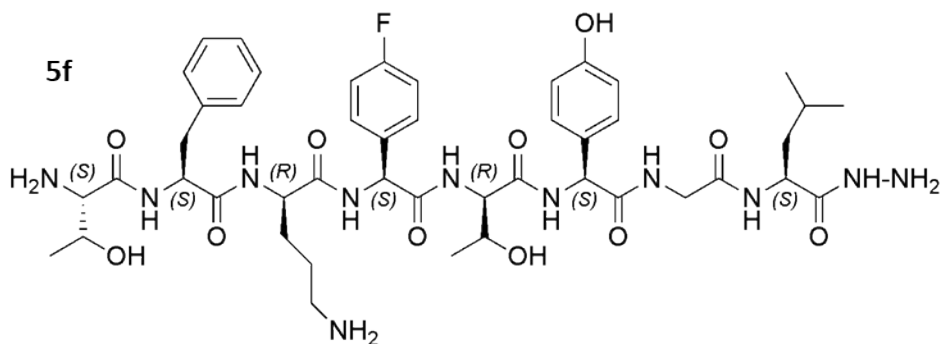

Chemical Formula:  $C_{46}H_{64}FN_{11}O_{11}$

Exact Mass: 965.4771

Molecular Weight: 966.0824

### <Chromatogram>

mV

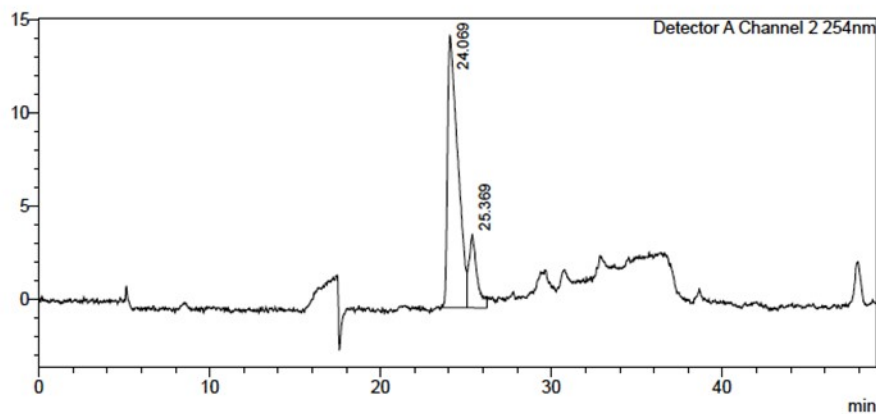

Peak Table

| Peak# | Ret. Time | Area   | Height | Conc   | Unit | Mark | Name | Area%   |
|-------|-----------|--------|--------|--------|------|------|------|---------|
| 1     | 24.069    | 604707 | 14565  | 82.565 |      | M    |      | 82.565  |
| 2     | 25.369    | 127691 | 3910   | 17.435 |      | VM   |      | 17.435  |
| Total |           | 732398 | 18476  |        |      |      |      | 100.000 |

### <Spectrum>

Line#:1 R.Time:—(Scan#:—)

MassPeaks:1751

RawMode:Averaged 23.667-26.100(1421-1567) BasePeak:484.3(14878606)

BG Mode:None Segment 1 - Event 1

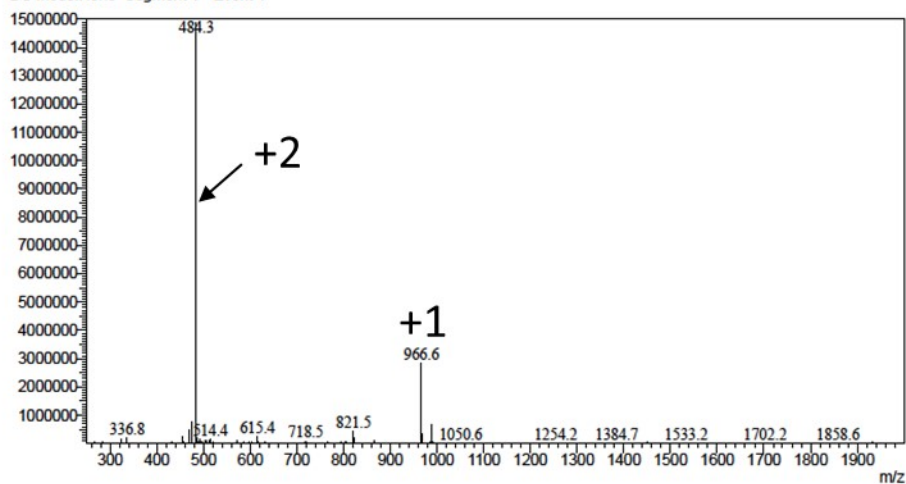

## Compound characterizations

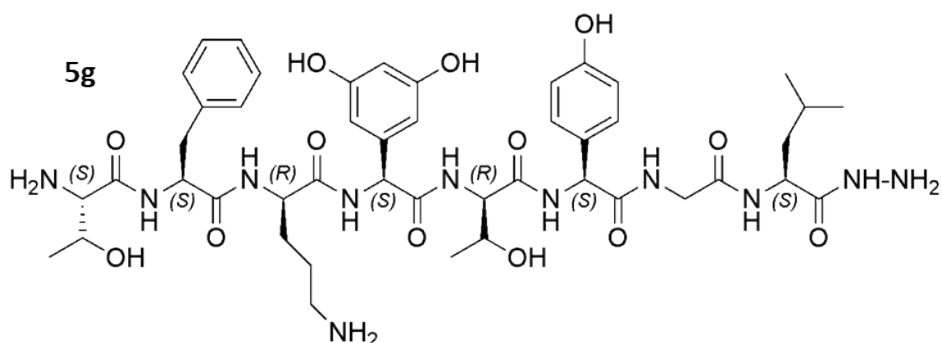

Chemical Formula:  $C_{46}H_{65}N_{11}O_{13}$

Exact Mass: 979.4763

Molecular Weight: 980.0900

### <Chromatogram>

mV

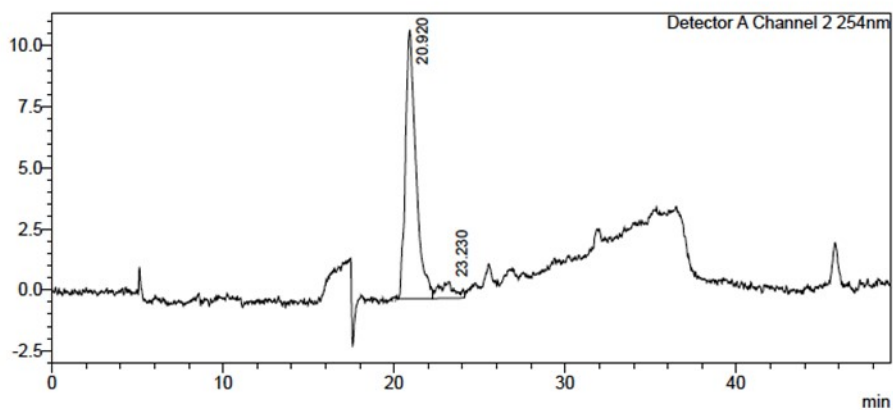

Peak Table

| Peak# | Ret. Time | Area   | Height | Conc.  | Unit | Mark | Name | Area%   |
|-------|-----------|--------|--------|--------|------|------|------|---------|
| 1     | 20.920    | 469301 | 10991  | 91.770 |      | M    |      | 91.770  |
| 2     | 23.230    | 42087  | 677    | 8.230  |      | V M  |      | 8.230   |
| Total |           | 511388 | 11668  |        |      |      |      | 100.000 |

### <Spectrum>

Line#: 1 R.Time: (Scan#: —)

MassPeaks: 1751

RawMode: Averaged 20.233-22.200(1215-1333) BasePeak: 491.3(11770595)

BG Mode: None Segment 1 - Event 1

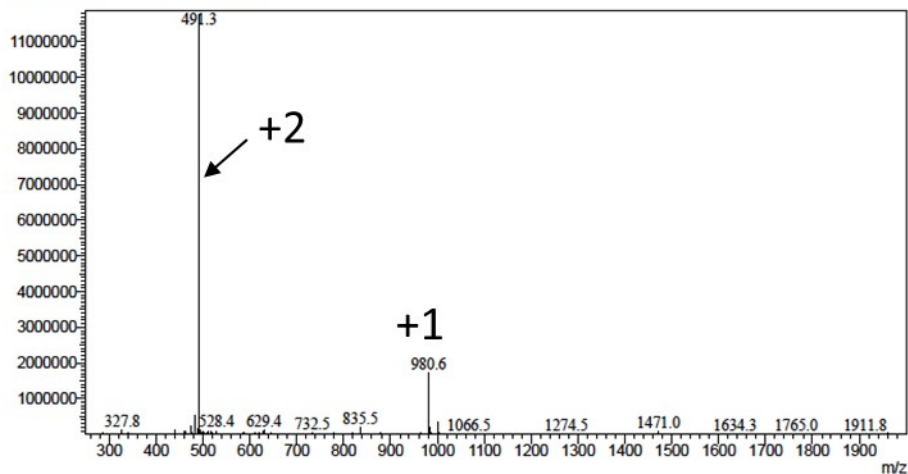

## Compound characterizations

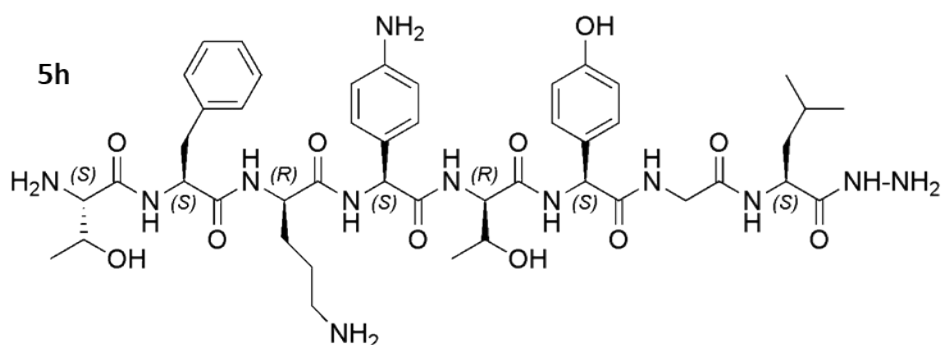

Chemical Formula:  $C_{46}H_{66}N_{12}O_{11}$

Exact Mass: 962.4974

Molecular Weight: 963.1070

### <Chromatogram>

mV

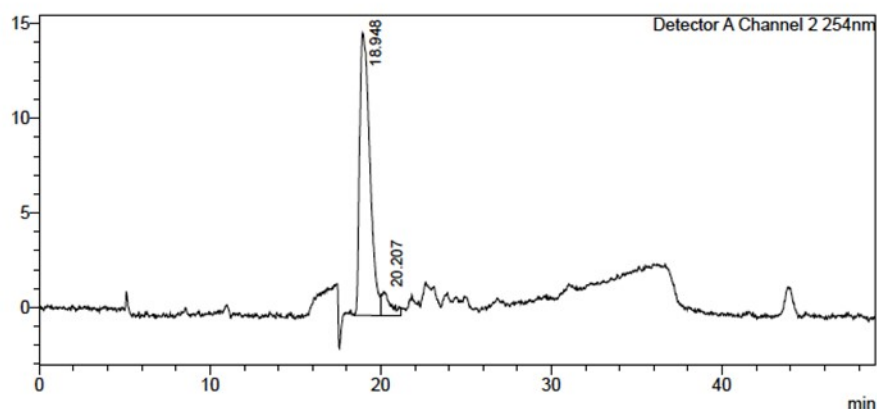

Peak Table

| Peak# | Ret. Time | Area   | Height | Conc.  | Unit | Mark | Name | Area%   |
|-------|-----------|--------|--------|--------|------|------|------|---------|
| 1     | 18.948    | 616010 | 14939  | 92.486 |      | M    |      | 92.486  |
| 2     | 20.207    | 50047  | 1239   | 7.514  |      | VM   |      | 7.514   |
| Total |           | 666057 | 16198  |        |      |      |      | 100.000 |

### <Spectrum>

Line#1 R.Time:—(Scan#.—)

MassPeaks:1751

RawMode:Averaged 18.433-20.467(1107-1229) BasePeak:482.8(11168501)

BG Mode:None Segment 1 - Event 1

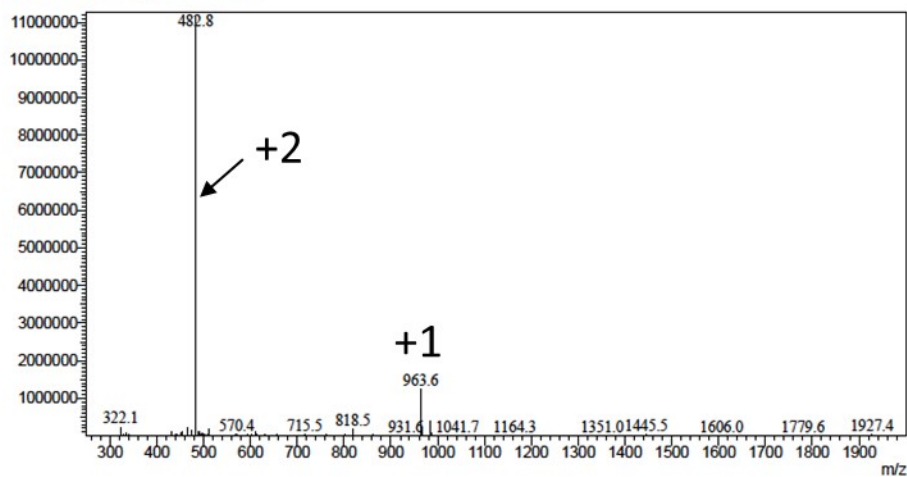

## Compound characterizations

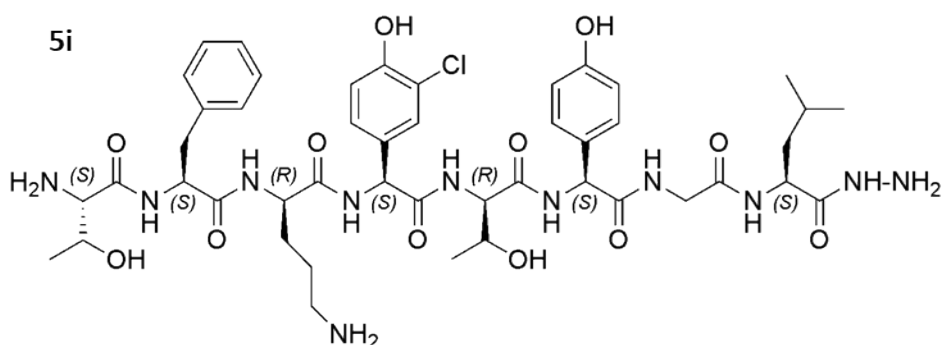

Chemical Formula:  $C_{46}H_{64}ClN_{11}O_{12}$

Exact Mass: 997.44

Molecular Weight: 998.53

### <Chromatogram>

mV

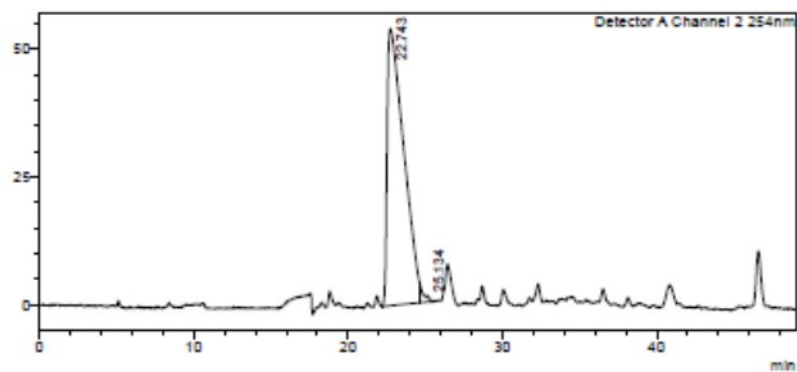

| Peak# | Ret. Time | Area    | Height | Conc   | Unit | Mark | Name | Area%   |
|-------|-----------|---------|--------|--------|------|------|------|---------|
| 1     | 22.743    | 4019779 | 54054  | 98.456 |      | M    |      | 98.456  |
| 2     | 25.134    | 63034   | 1207   | 1.544  |      | V.M  |      | 1.544   |
| Total |           | 4082814 | 55261  |        |      |      |      | 100.000 |

### <Spectrum>

Line#1 RTime:—(Scan#—)

MassPeaks:1751

RawMode:Averaged 22.367-25.500(1343-1531) BasePeak:500.4(16069809)

BG Mode:None Segment 1 - Event 1

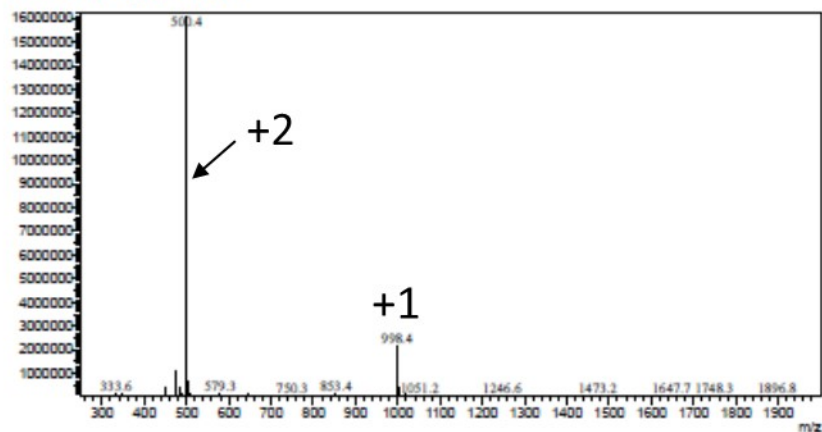

## Compound characterizations

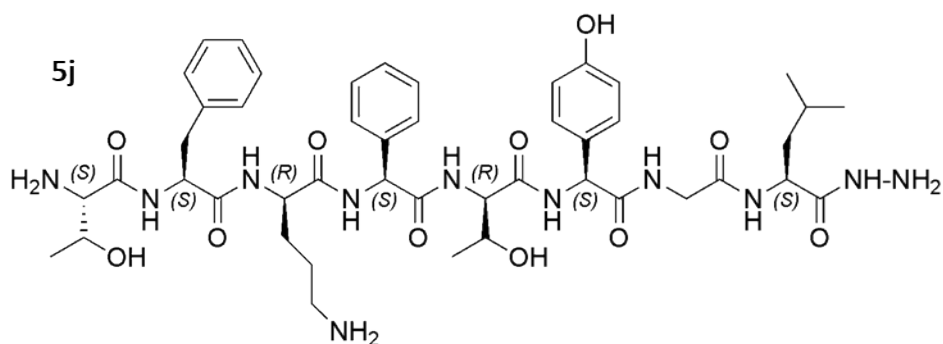

Chemical Formula:  $C_{46}H_{65}N_{11}O_{11}$

Exact Mass: 947.4865

Molecular Weight: 948.0920

### <Chromatogram>

mV

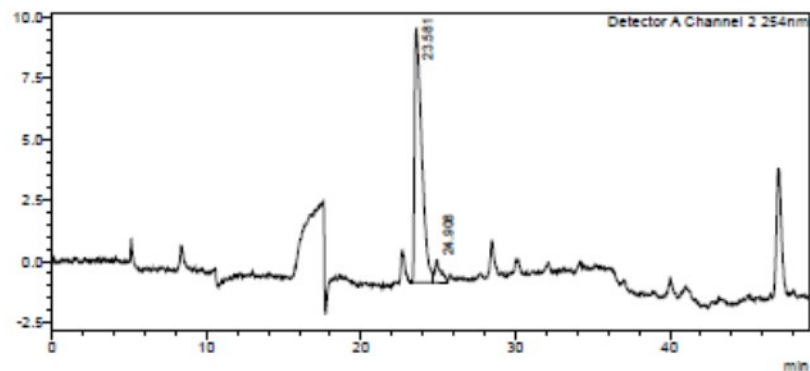

Detector A Channel 2 254nm

| Peak# | Ret. Time | Area   | Height | Cross  | Unit | Mark | Name | Area%   |
|-------|-----------|--------|--------|--------|------|------|------|---------|
| 1     | 23.581    | 313644 | 10057  | 92.772 |      |      |      | 94.772  |
| 2     | 24.908    | 25295  | 930    | 7.228  |      | Val  |      | 7.228   |
| Total |           | 339639 | 11287  |        |      |      |      | 100.000 |

### <Spectrum>

Line# 1 R.Time: (Scan#)

MassPeaks: 1751

RawMode: Averaged 23.133-25.233(1389-1515) BasePeak: 475.1(9041649)

BG Mode: None Segment 1 - Event 1

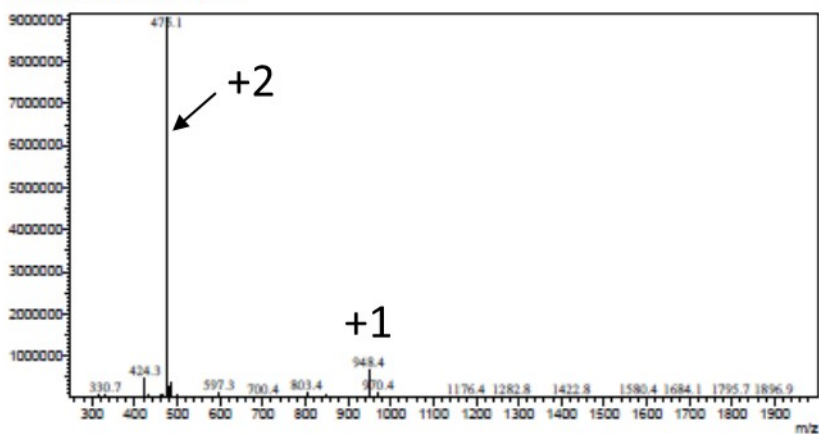

## Compound characterizations

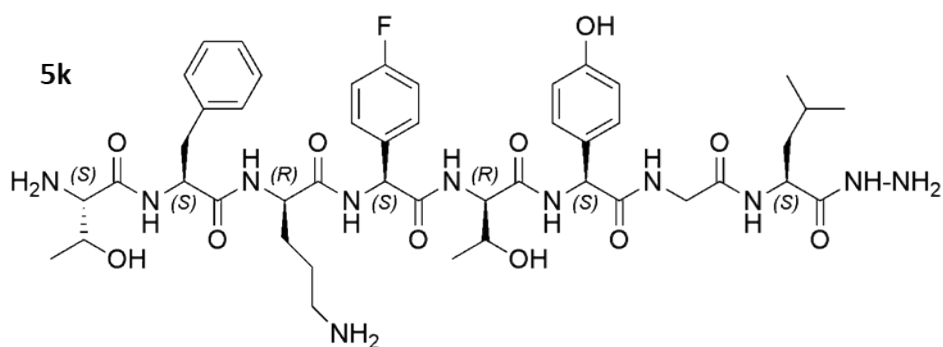

Chemical Formula:  $C_{46}H_{64}FN_{11}O_{11}$

Exact Mass: 965.4771

Molecular Weight: 966.0824

### <Chromatogram>

mV

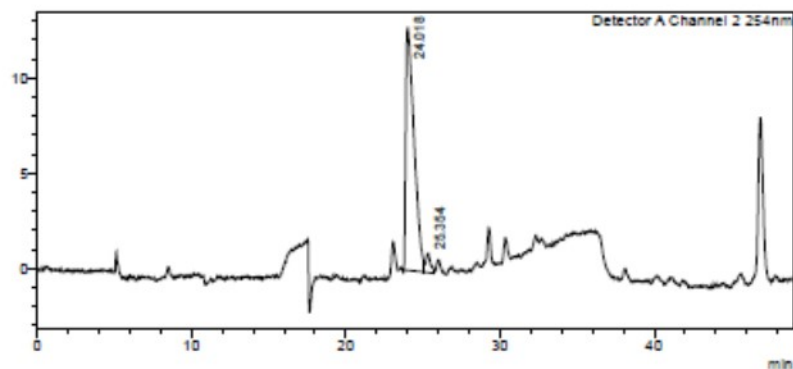

Detector A Channel 2 254nm

| Peak# | Ret. Time | Area   | Height | Conc.  | Unit | Mark | Name | Area%   |
|-------|-----------|--------|--------|--------|------|------|------|---------|
| 1     | 24.018    | 472953 | 12737  | 95.561 |      | M    |      | 95.561  |
| 2     | 25.354    | 21968  | 1019   | 4.439  |      | VM   |      | 4.439   |
| Total |           | 494921 | 13756  |        |      |      |      | 100.000 |

### <Spectrum>

Line#1 R.Time:—(Scan#—)

MassPeaks:1751

RawMode:Averaged 23.733-25.800(1425-1549) BasePeak:484.1(12879398)

BG Mode:None Segment 1 - Event 1

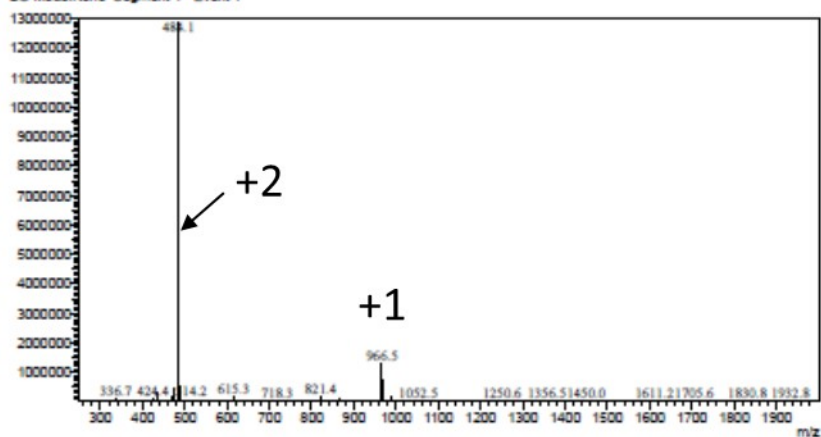

## Compound characterizations

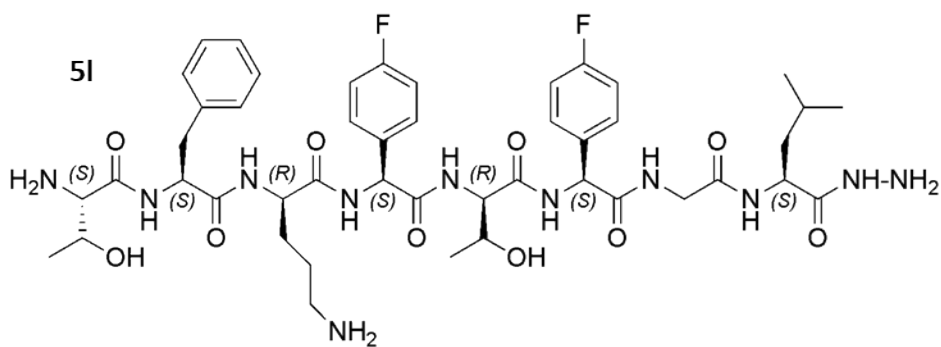

Chemical Formula:  $C_{46}H_{63}F_2N_{11}O_{10}$

Exact Mass: 967.47

Molecular Weight: 968.07

### <Chromatogram>

mV

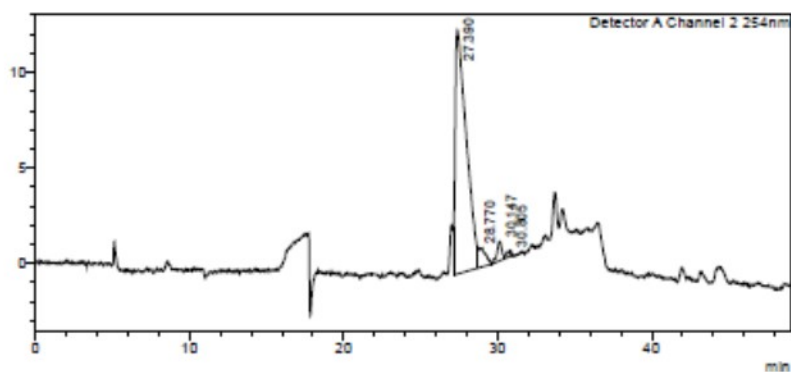

Detector A Channel 2 254nm

| Peak# | Ret. Time | Area   | Height | Comp.  | Unit | Mark | Name | Area%   |
|-------|-----------|--------|--------|--------|------|------|------|---------|
| 1     | 27.860    | 637299 | 10777  | 91.183 |      | M    |      | 91.183  |
| 2     | 28.770    | 39079  | 1055   | 4.733  |      | V M  |      | 4.733   |
| 3     | 30.147    | 22318  | 1006   | 3.193  |      | M    |      | 3.193   |
| 4     | 30.805    | 6230   | 301    | 0.891  |      | V M  |      | 0.891   |
| Total |           | 699926 | 15139  |        |      |      |      | 100.000 |

### <Spectrum>

Line: 1 R.Time: (Scan#)

MassPeaks: 1751

RawMode: Averaged 26.967-31.033 (1619-1863) BasePeak: 485.2 (11446563)

BG Mode: None Segment 1 - Event 1

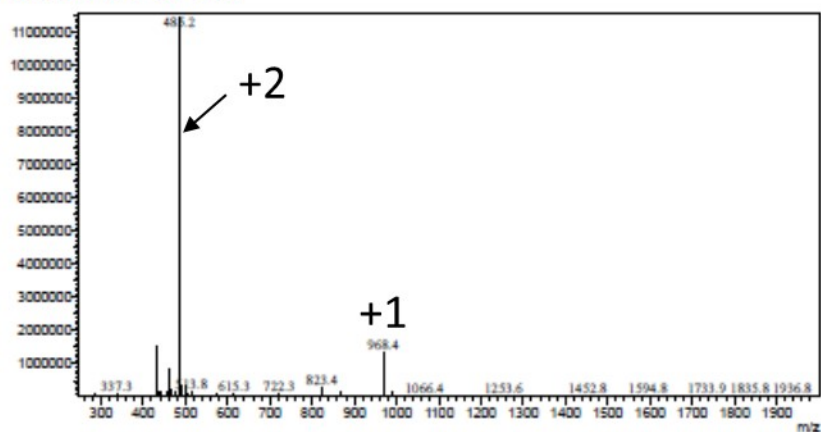

## Compound characterizations

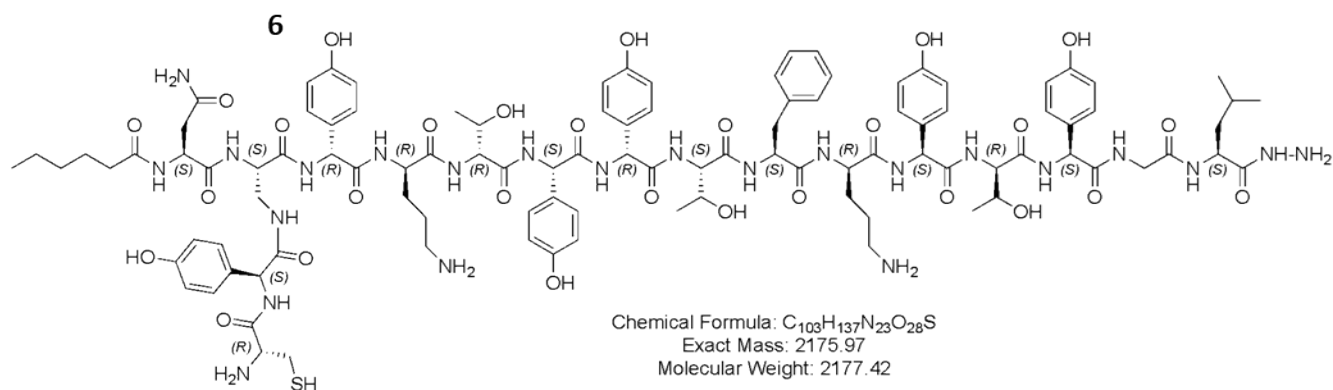

### <Chromatogram>

mV

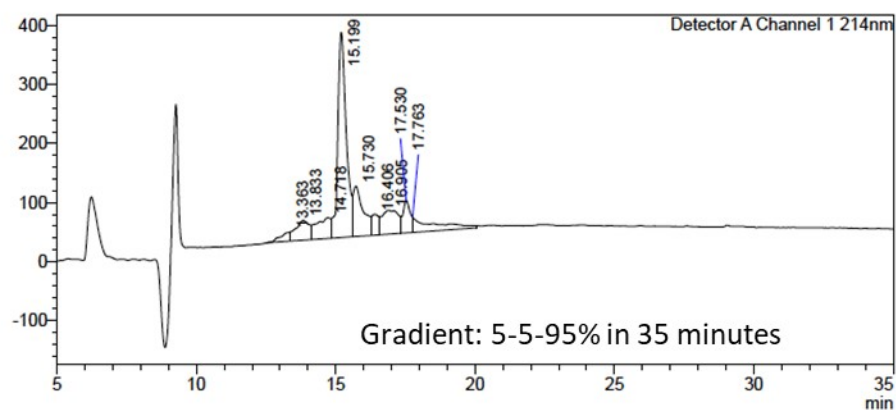

### <Spectrum>

Line#:1 R.Time:15.367(Scan#:923)  
 MassPeaks:1975  
 RawMode:Single 15.367(923) BasePeak:726.7(8870179)  
 BG Mode:None Segment 1 - Event 1

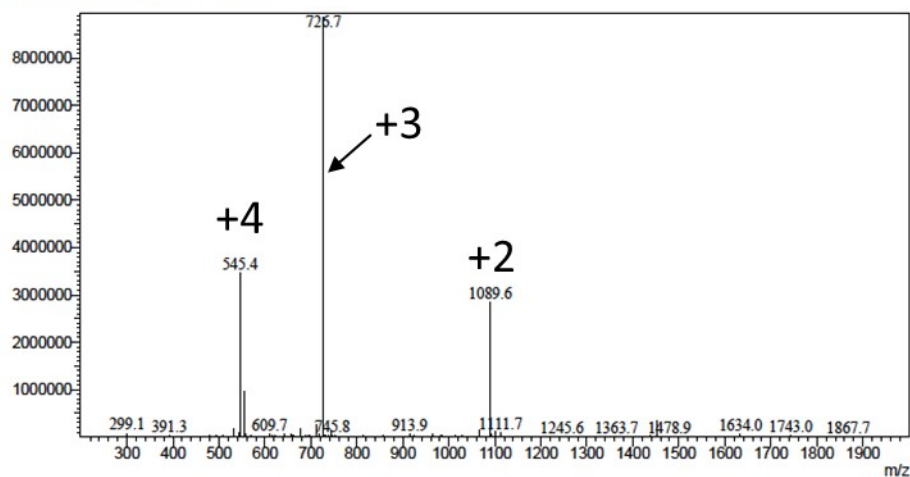

## Compound characterizations

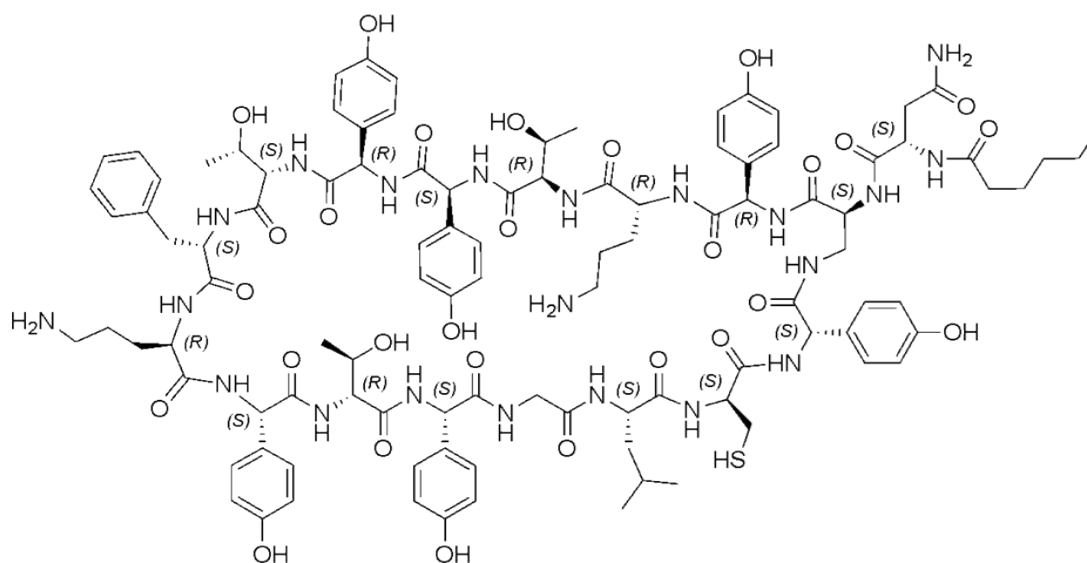

Chemical Formula:  $C_{103}H_{133}N_{21}O_{28}S$

Exact Mass: 2143.9350

Molecular Weight: 2145.3760

**7a**

### <Chromatogram>

uV

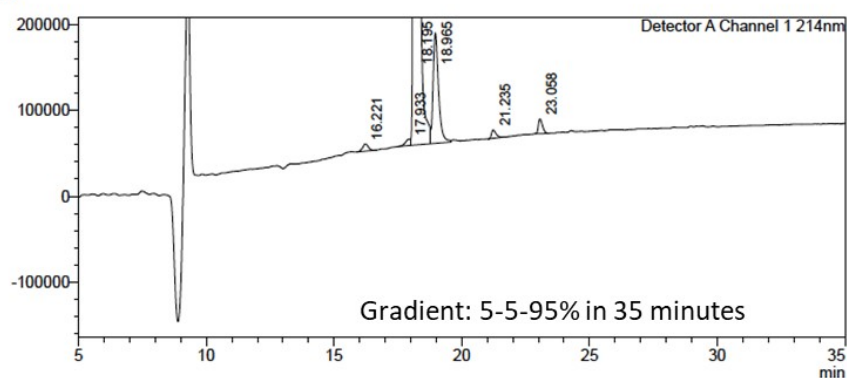

**7b**

### <Chromatogram>

mV

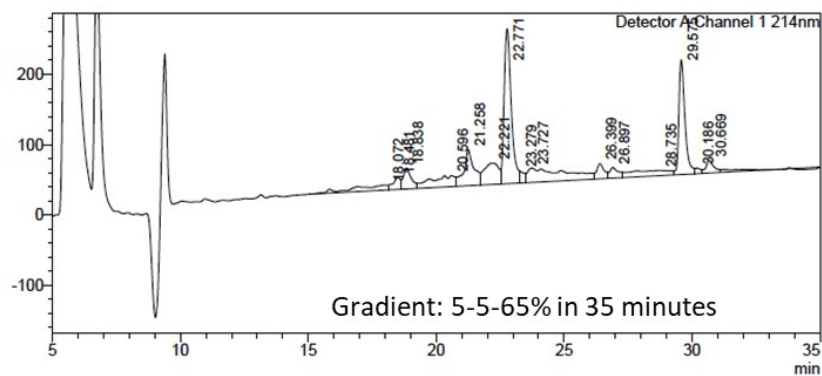

## Compound characterizations

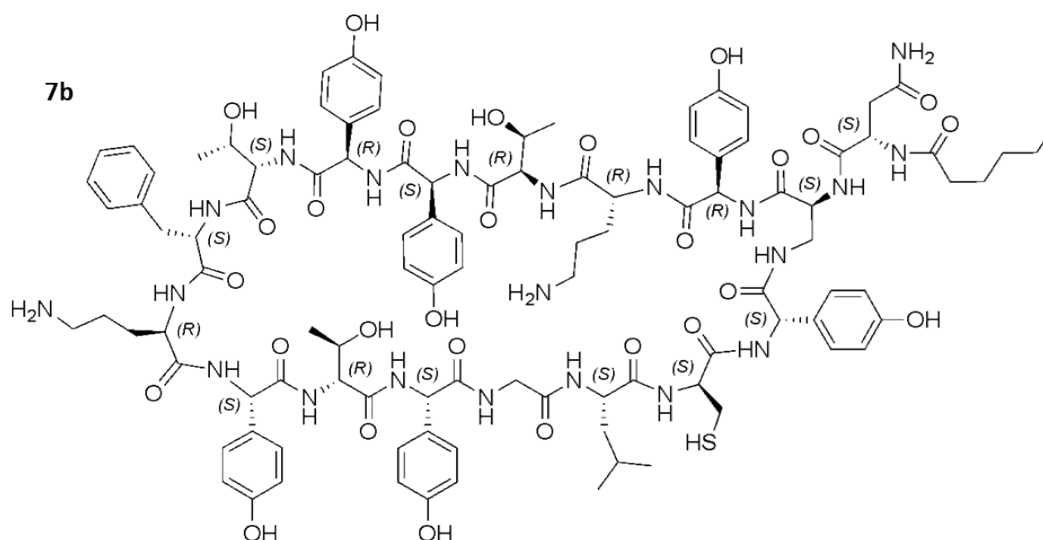

Chemical Formula:  $C_{103}H_{133}N_{21}O_{28}S$

Exact Mass: 2143.9350

Molecular Weight: 2145.3760

### <Chromatogram>

mV

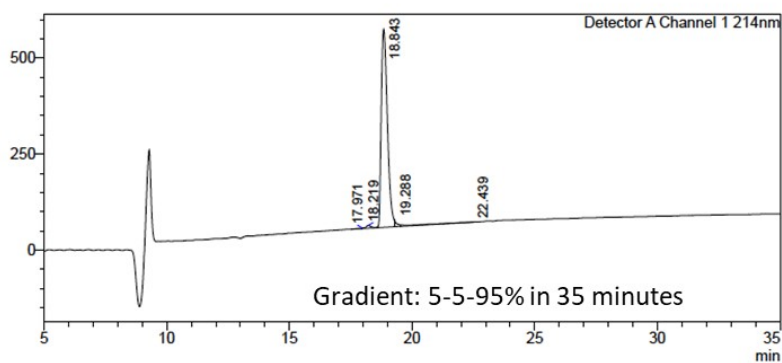

### <Spectrum>

Line#: 1 R Time: 18.967 (Scan#: 1139)  
Mass Peaks: 1896  
Raw Mode: Single 18.967 (1139) Base Peak: 1073.5 (8533832)  
BG Mode: None Segment 1 - Event 1

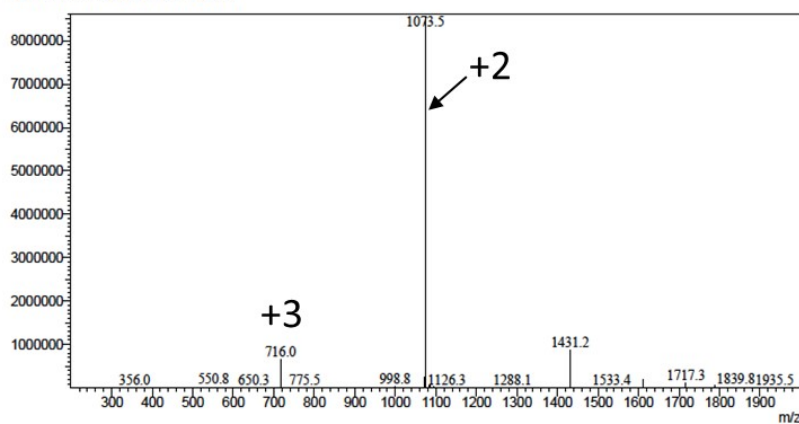

## Compound characterizations

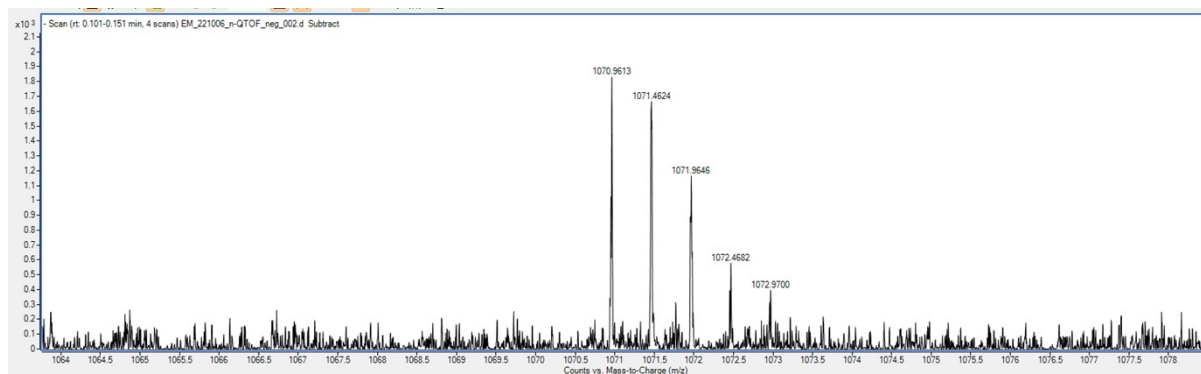

$\text{C}_{103}\text{H}_{133}\text{N}_{21}\text{O}_{28}\text{S}$   $[\text{M}-2\text{H}]^{-2}$  calculated: 1071.4619 Found: 1070.4624

## Compound characterizations

8 – NCL/DS

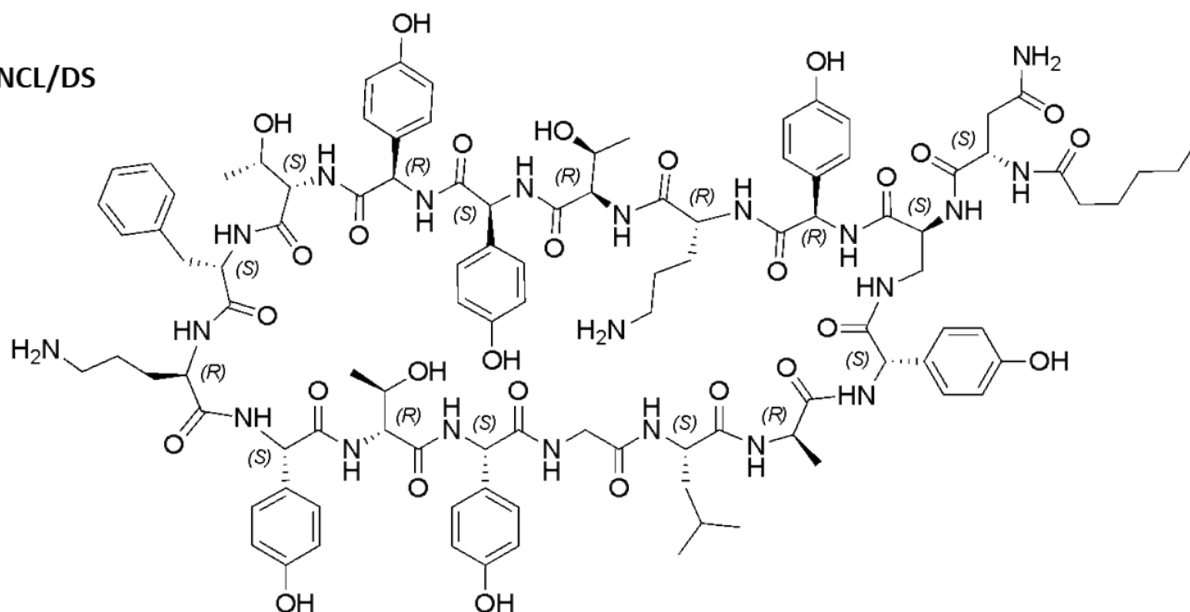

Chemical Formula:  $C_{103}H_{133}N_{21}O_{28}$

Exact Mass: 2111.96

Molecular Weight: 2113.32

### <Chromatogram>

uV

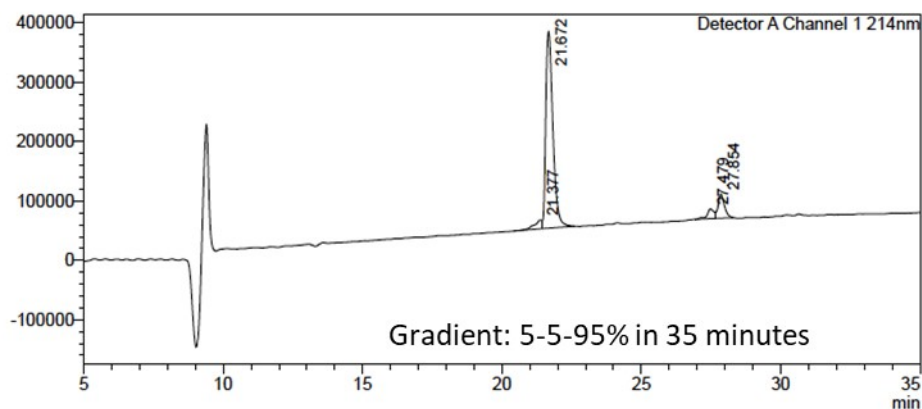

### <Spectrum>

Line#:1 R.Time:22.133(Scan#:1329)  
MassPeaks:2014  
RawMode:Single 22.133(1329) BasePeak:1057.5(19613784)  
BG Mode:None Segment 1 - Event 1

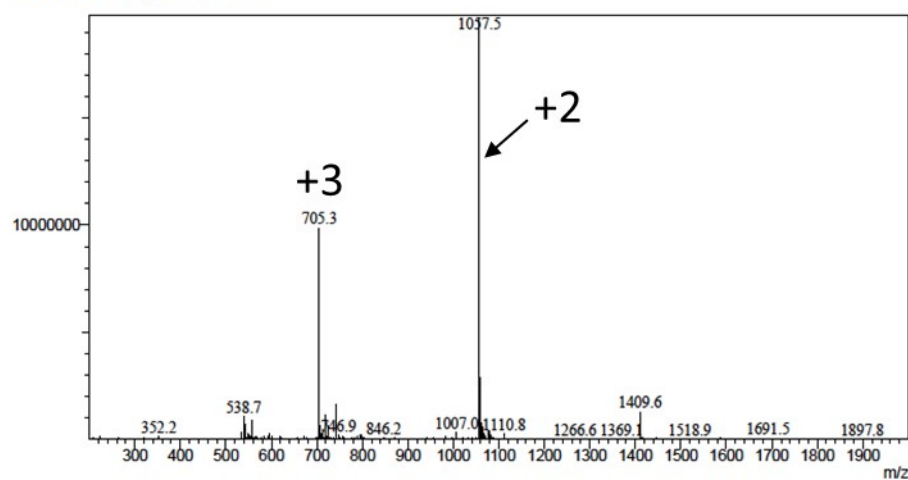

## Compound characterizations

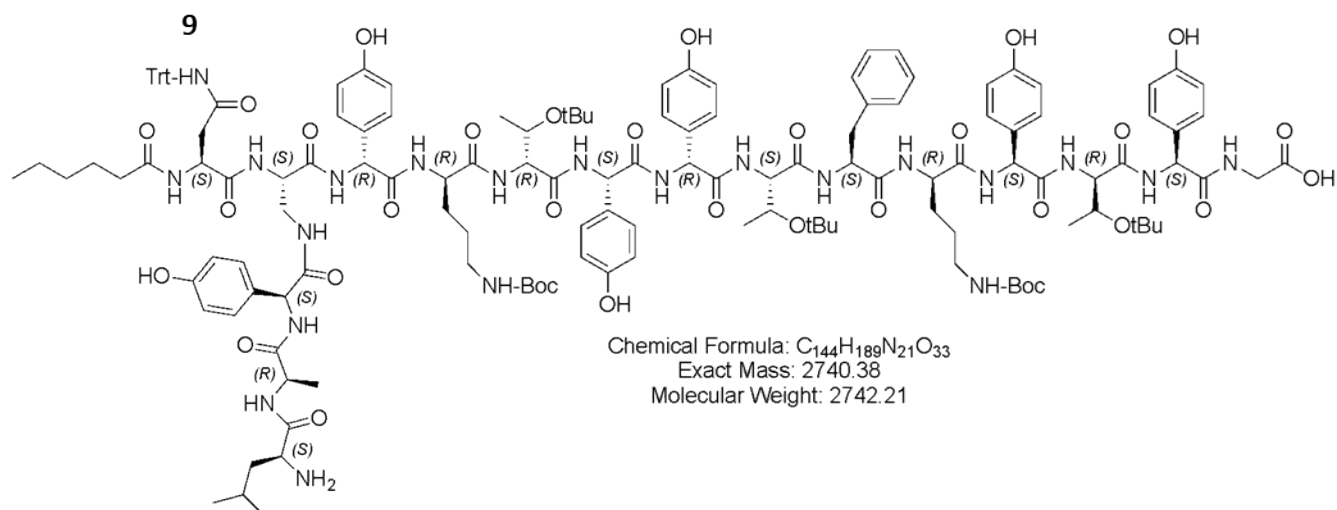

### <Chromatogram> mV

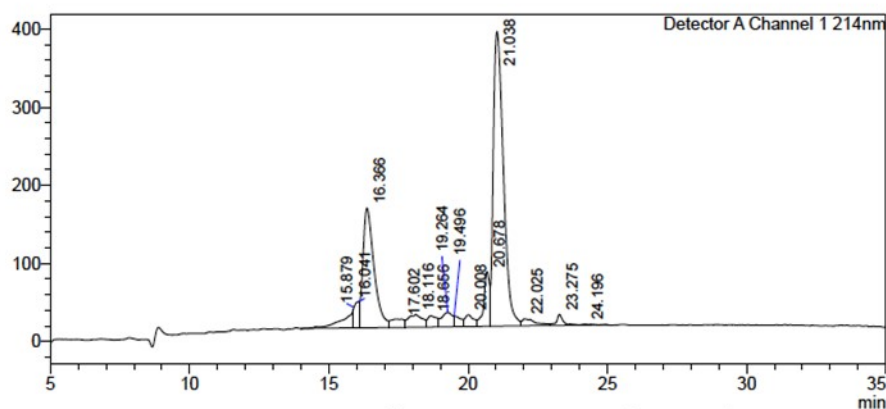

Gradient: 40-40-100% in 35 minutes

### <Spectrum>

Line#: 1 R.Time: (Scan#: —)  
 MassPeaks: 1801  
 RawMode: Averaged 20.367-21.933(923-1017) BasePeak: 1371.8(10409756)  
 BG Mode: None Segment 1 - Event 1

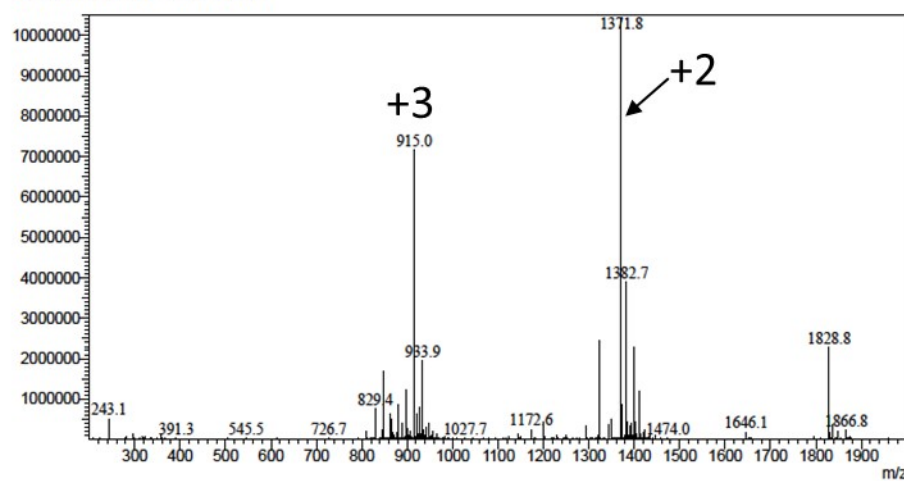

## Compound characterizations

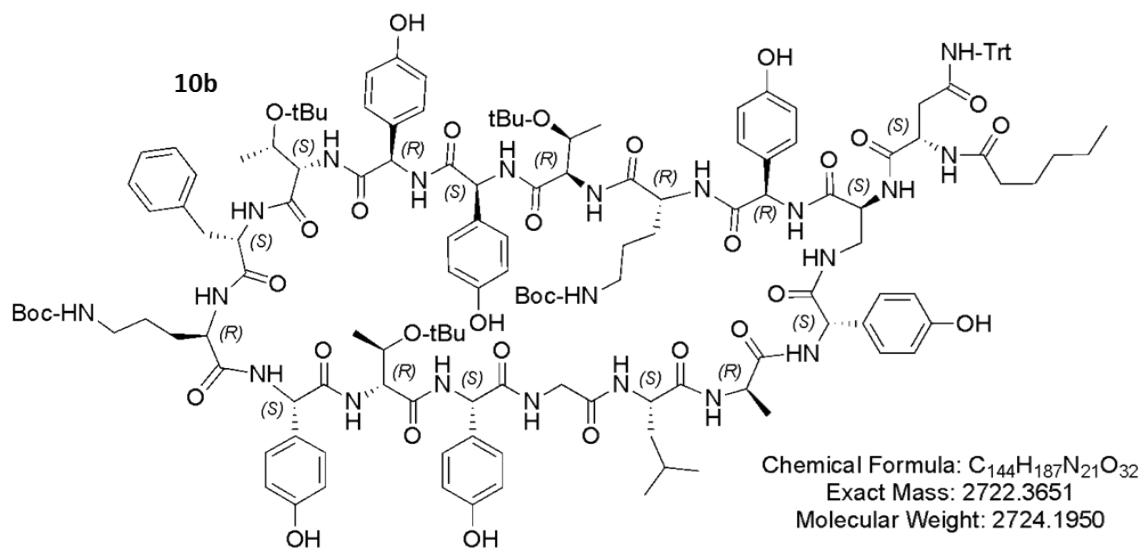

### <Chromatogram> mV

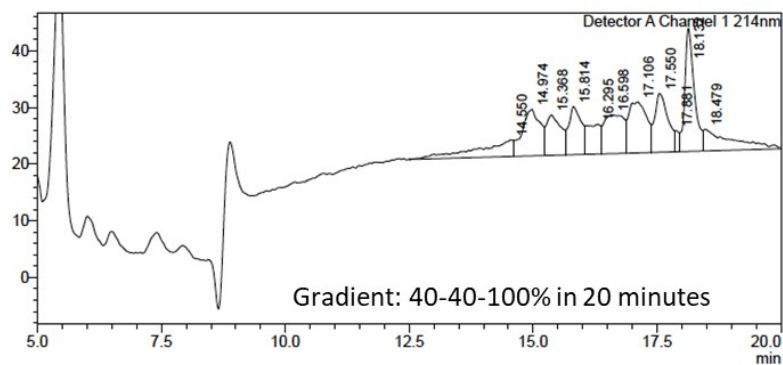

### <Spectrum>

Line#:1 R.Time:—(Scan#:—)  
 MassPeaks:1801  
 RawMode:Averaged 18.067-18.400(785-805) BasePeak:908.9(1260359)  
 BG Mode:None Segment 1 - Event 1

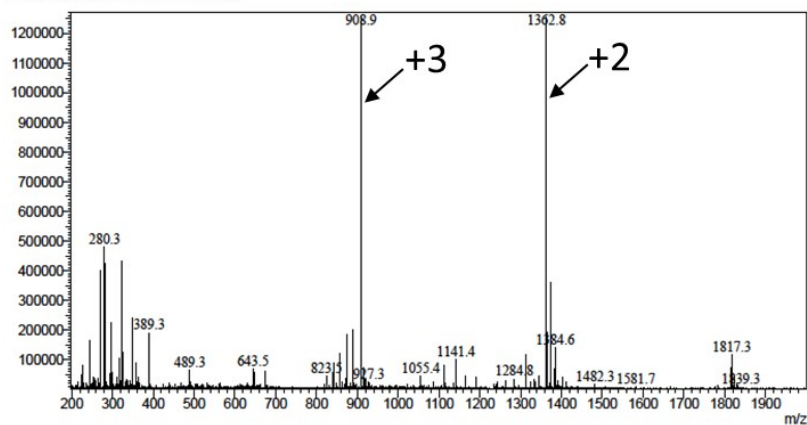

## 8 – Macro

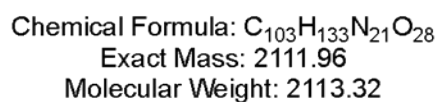 $\mu\text{V}$ 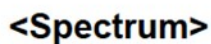

Line#:1 R.Time:21.533(Scan#:1293)  
MassPeaks:2091  
RawMode:Single 21.533(1293) BasePeak:1057.7(28397096)  
BG Mode:None Segment 1 - Event 1

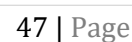

## Compound characterizations

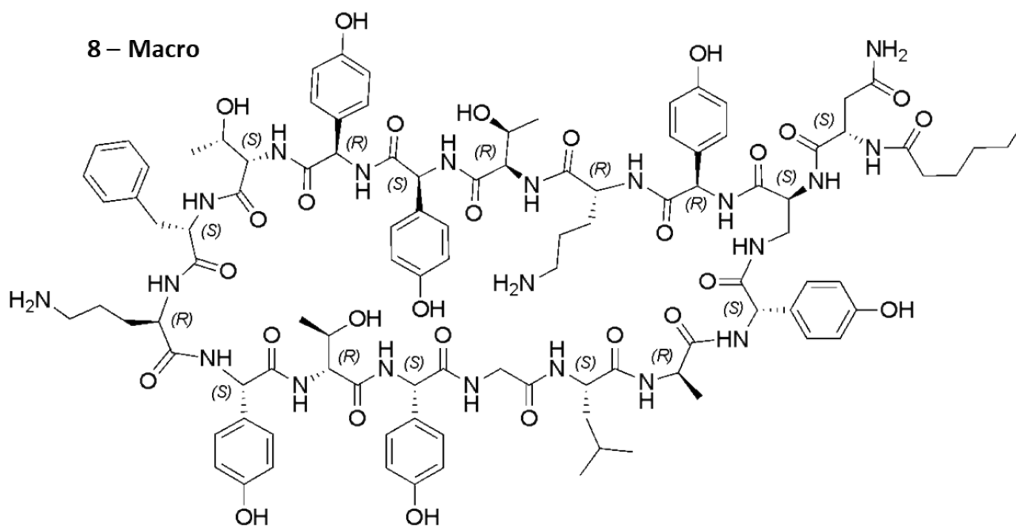

Chemical Formula:  $C_{103}H_{133}N_{21}O_{28}$

Exact Mass: 2111.96

Molecular Weight: 2113.32

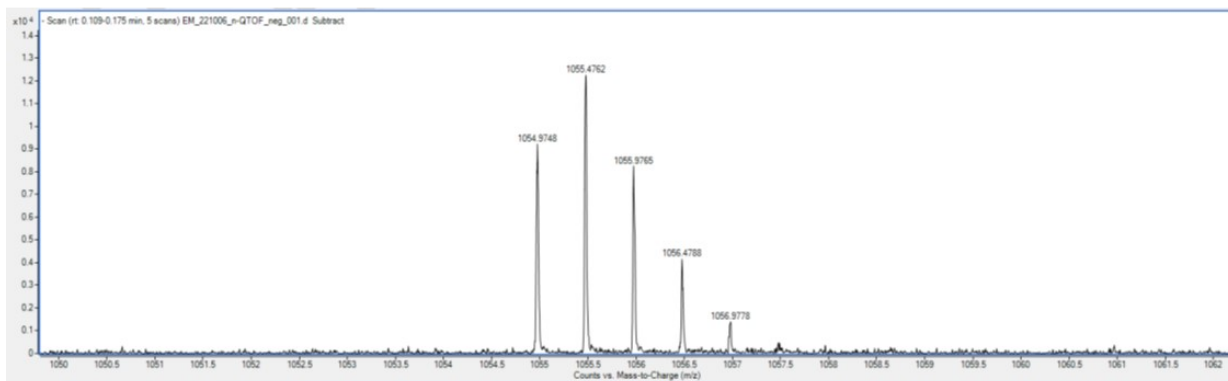

HRMS: m/z calcd for  $[M-2H]^{2-}$ -C<sub>103</sub>H<sub>131</sub>N<sub>21</sub>O<sub>28</sub><sup>2-</sup> 1055.4758 Da, found 1054.9748 Da.

Calculated exact mass: 2111.94 Da.

## Compound characterizations

### 8 – Co-injection

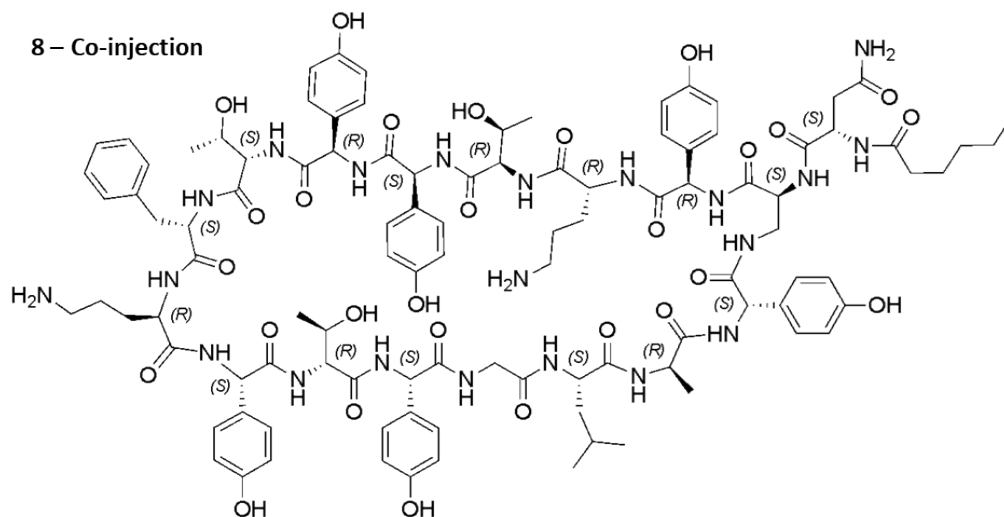

Chemical Formula:  $C_{103}H_{133}N_{21}O_{28}$

Exact Mass: 2111.96

Molecular Weight: 2113.32

### <Chromatogram>

uV

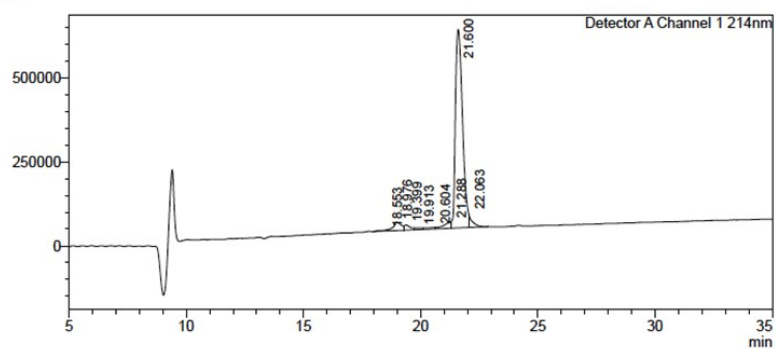

### <Spectrum>

Line# 1 R.Time:—(Scan#:—)

MassPeaks: 1801

RawMode: Averaged 21.367-22.200(1283-1333) BasePeak: 1057.6(17508904)

BG Mode: None Segment 1 - Event 1

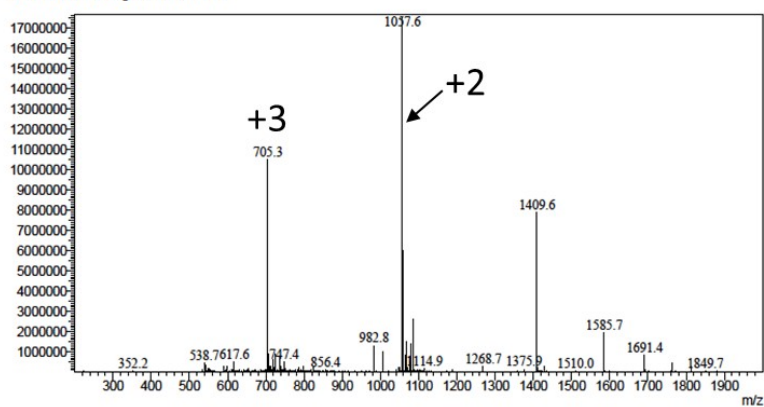

## Compound characterizations

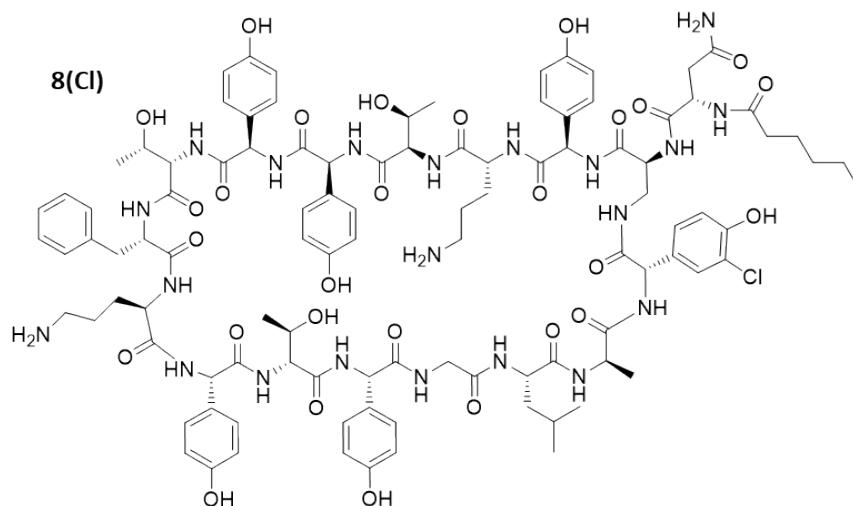

Chemical Formula:  $C_{103}H_{132}ClN_{21}O_{28}$

Exact Mass: 2145.92

Molecular Weight: 2147.76

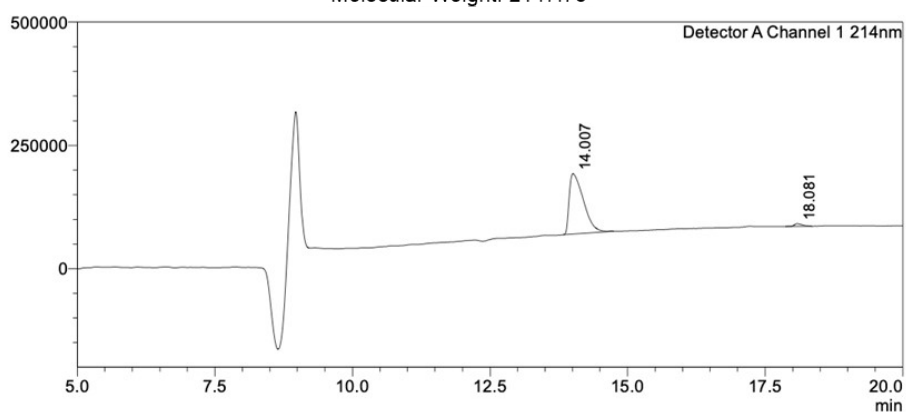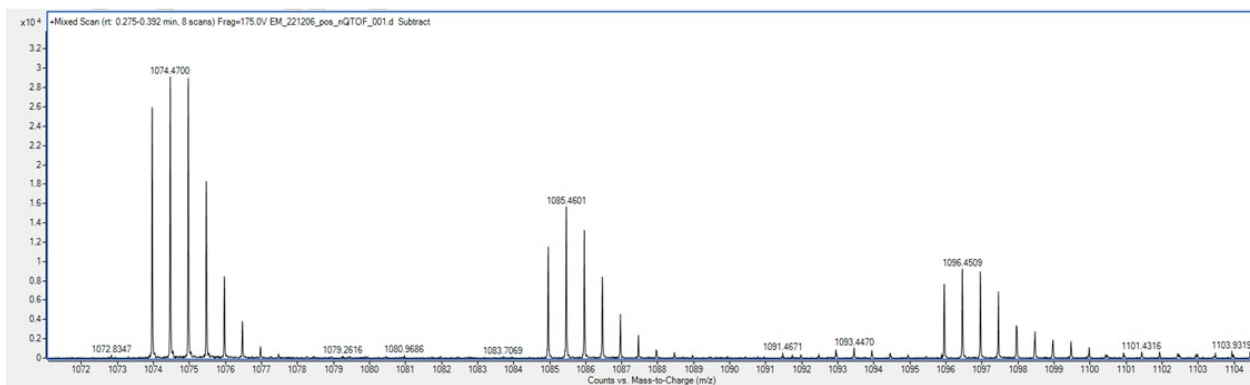

HRMS:  $m/z$  calcd for  $[M+2H]^{2+}$   $C_{103}H_{134}ClN_{21}O_{28}^{2+}$  1074.4709 Da,  
found 1074.4700 Da.

Calculated exact mass: 2146.94 Da.

## Compound characterizations

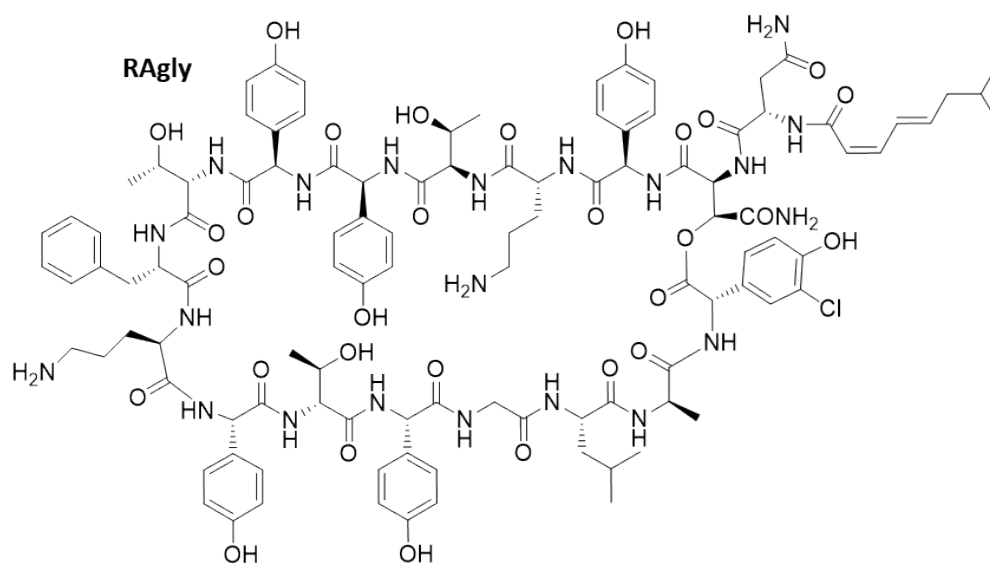

Chemical Formula:  $C_{107}H_{134}ClN_{21}O_{30}$

Exact Mass: 2227.93

Molecular Weight: 2229.82

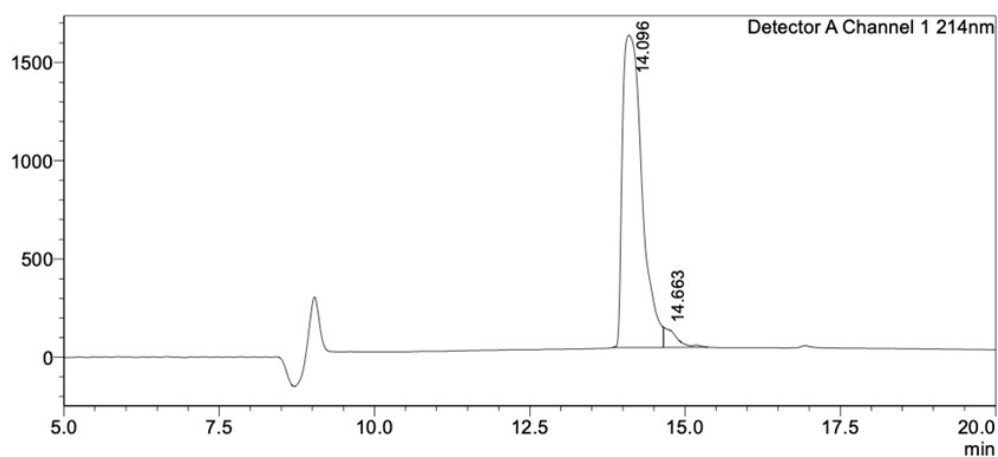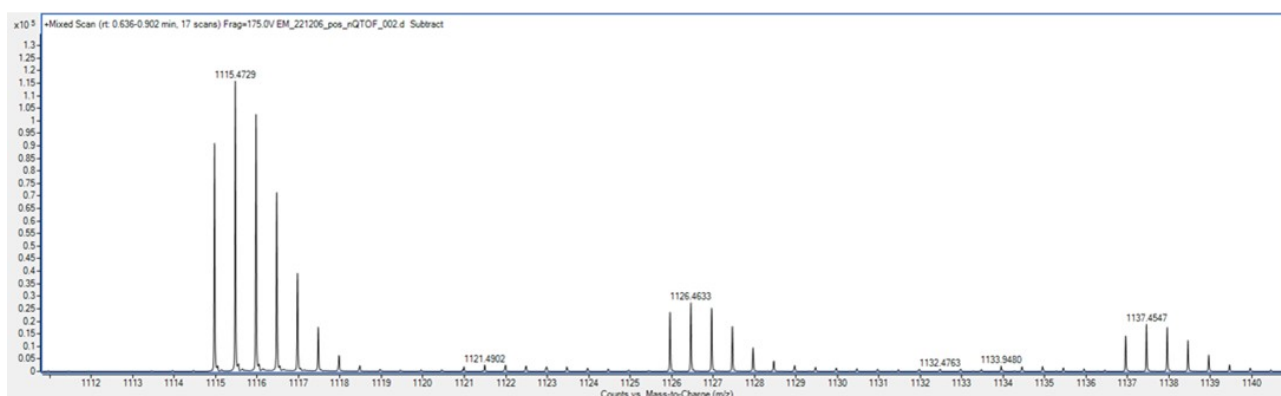

HRMS:  $m/z$  calcd for  $[M+2H]^{2+}$   $C_{107}H_{136}ClN_{21}O_{30}^{2+}$  1115.4737 Da,  
found 1115.4729 Da.

Calculated exact mass: 2228.94 Da.

## Compound characterizations

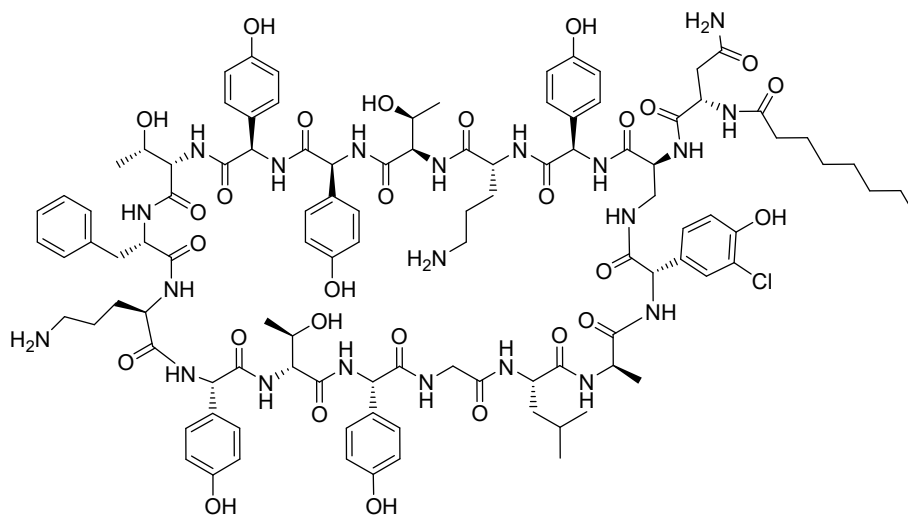

**11** Chemical Formula:  $C_{105}H_{136}ClN_{21}O_{28}$   
Exact Mass: 2173.9552

### <Chromatogram>

mV

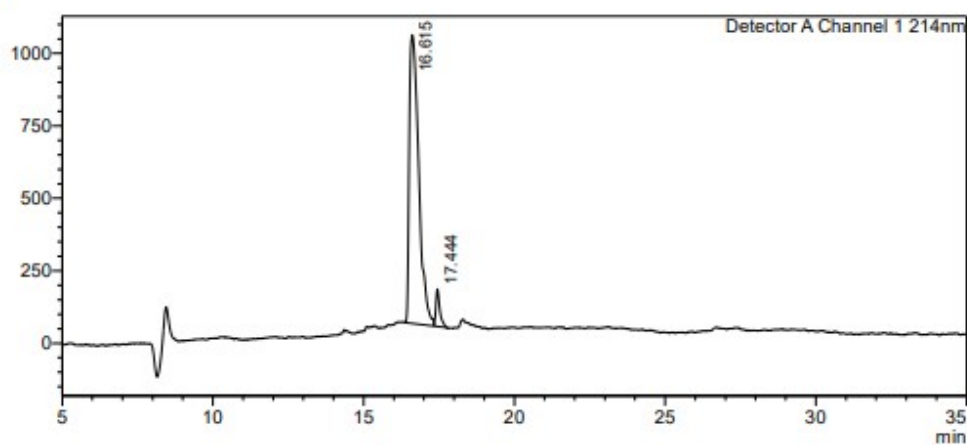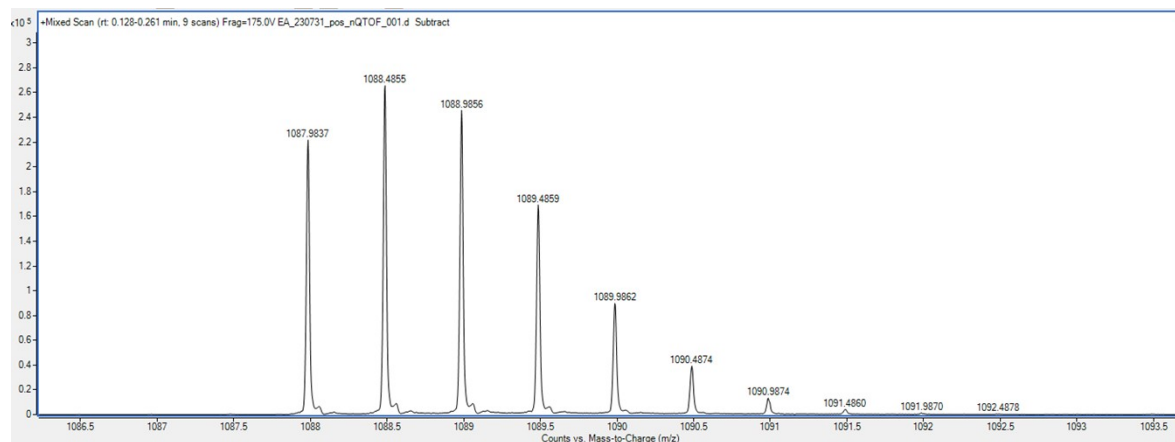

$C_{105}H_{138}ClN_{21}O_{28} [M+2H]^{+2}$  calculated: 1088.4866 Found: 1088.4855

## Compound characterizations

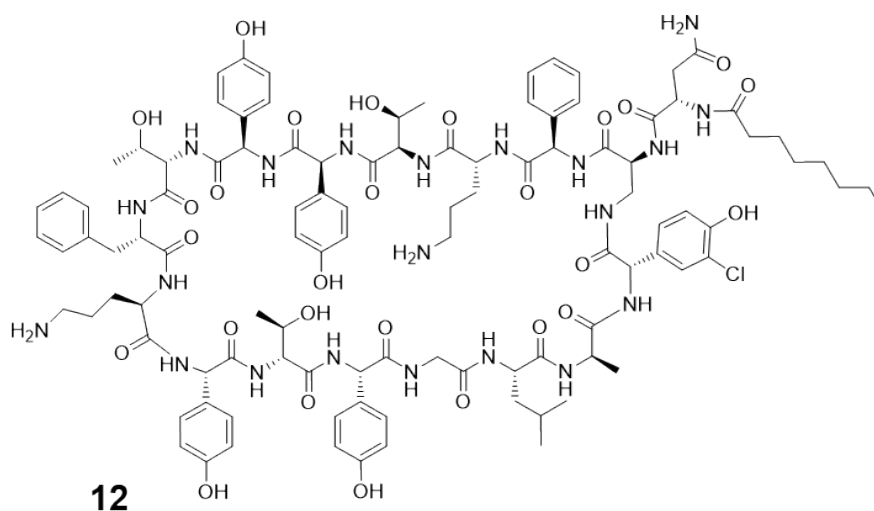

Chemical Formula:  $C_{105}H_{136}ClN_{21}O_{27}$   
Exact Mass: 2157.9603

### <Chromatogram>

mV

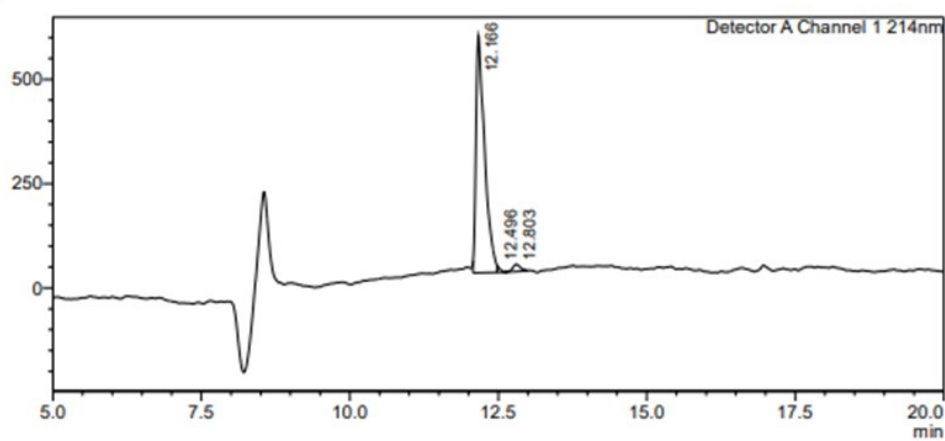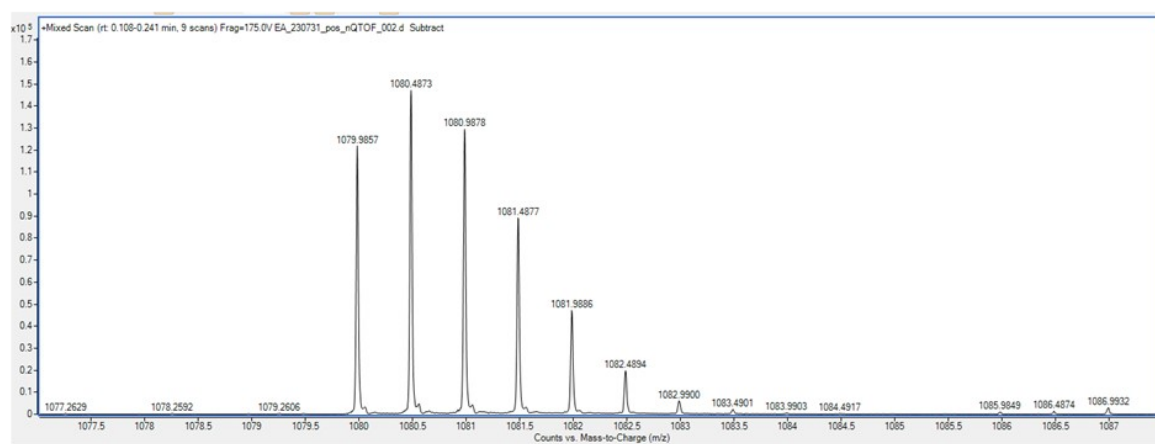

$C_{105}H_{136}ClN_{21}O_{27}$   $[M+2H]^+$  calculated: 1080.4891 Found: 1080.4873

## Compound characterizations

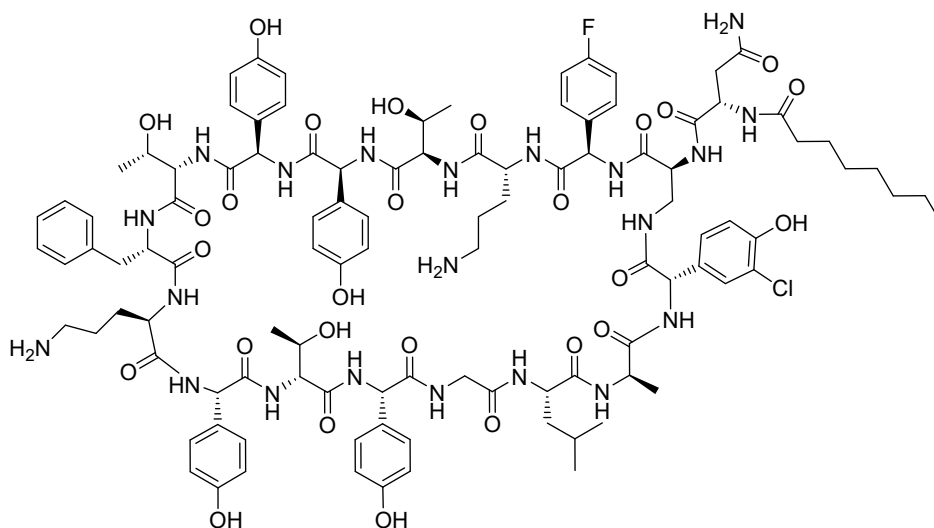

**13** Chemical Formula:  $C_{105}H_{135}ClFN_{21}O_{27}$   
Exact Mass: 2175.9509

### <Chromatogram>

mV

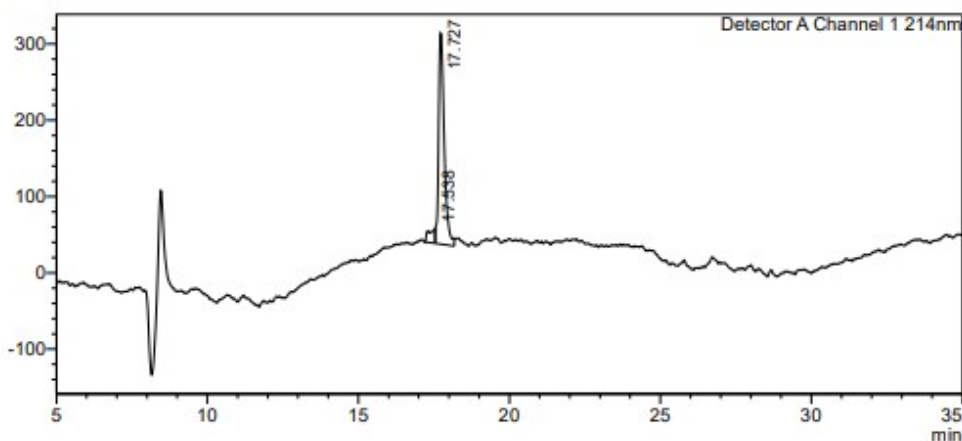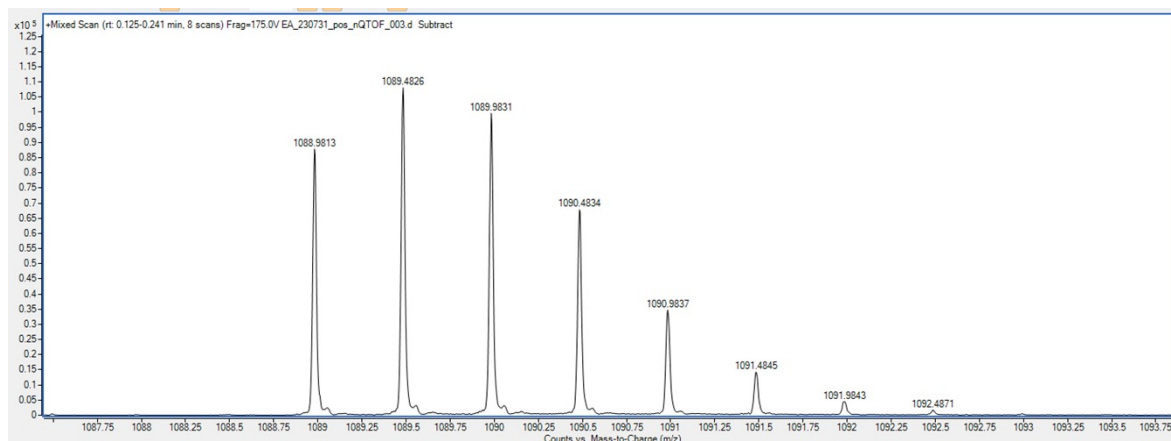

Chemical Formula:  $C_{105}H_{135}ClFN_{21}O_{27}$   $[M+2H]^{+2}$  calculated: 1089.4844 Found: 1089.4826

## Compound characterizations

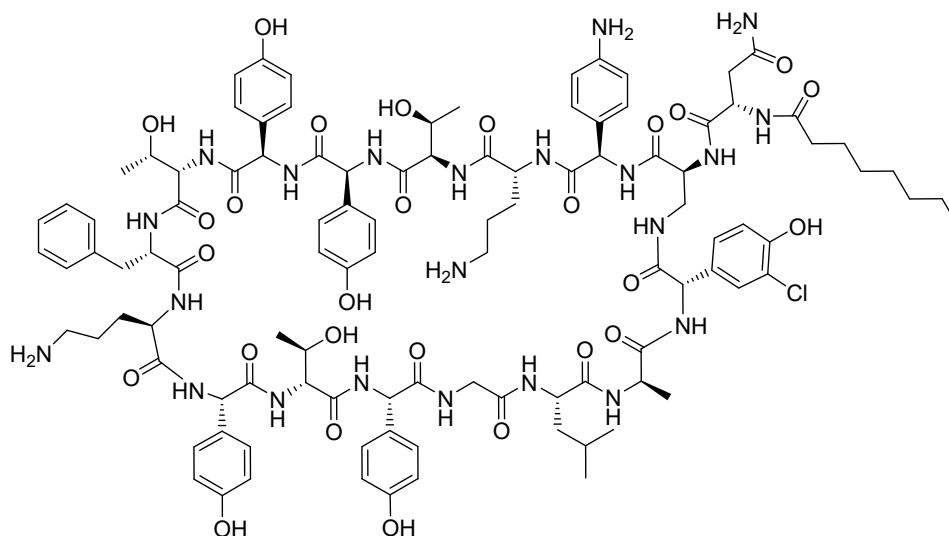

**14** Chemical Formula:  $C_{105}H_{137}ClN_{22}O_{27}$   
Exact Mass: 2172.9712

### <Chromatogram>

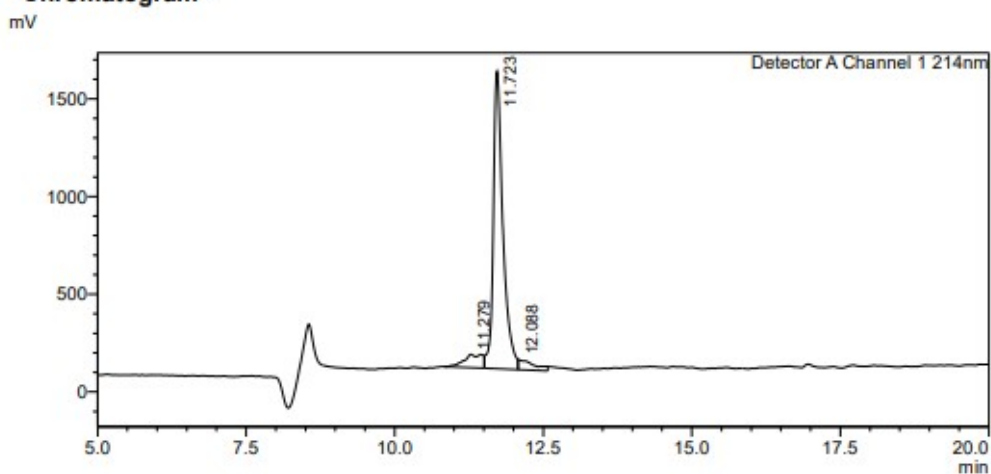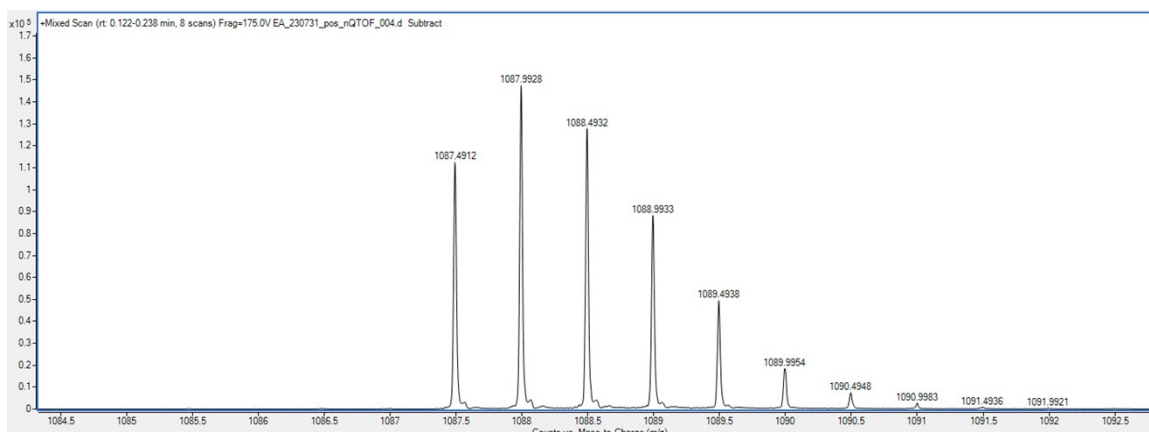

Chemical Formula:  $C_{105}H_{137}ClN_{22}O_{27}$   $[M+2H]^{+2}$  calculated: 1087.9946 Found: 1087.9928

## Supplementary references

- [1] C. Brieke, M. J. Cryle, *Org. Lett.* **2014**, *16*, 2454-2457.
- [2] D. Becker, U. Kazmaier, *Eur. J. Org. Chem.* **2015**, *2015*, 2591-2602.
- [3] J. Tailhades, M. Schoppet, A. Greule, M. Peschke, C. Brieke, M. J. Cryle, *Chem. Commun.* **2018**, *54*, 2146-2149.
- [4] J.-S. Zheng, S. Tang, Y. Guo, H.-N. Chang, L. Liu, *ChemBioChem* **2012**, *13*, 542-546.
- [5] A. Y. Peleg, D. Monga, S. Pillai, E. Mylonakis, R. C. Moellering, Jr., G. M. Eliopoulos, *J. Infec. Dis.* **2009**, *199*, 532-536.
- [6] M. M. Mwangi, S. W. Wu, Y. Zhou, K. Sieradzki, H. de Lencastre, P. Richardson, D. Bruce, E. Rubin, E. Myers, E. D. Siggia, A. Tomasz, *Proc Natl Acad Sci U.S.A.* **2007**, *104*, 9451-9456.
- [7] T. L. Hwang, A. J. Shaka, *J. Magn. Res. A* **1995**, *112*, 275-279.
- [8] F. Delaglio, S. Grzesiek, G. W. Vuister, G. Zhu, J. Pfeifer, A. Bax, *J. Biomol. NMR* **1995**, *6*, 277-293.
- [9] C. Bartels, T.-h. Xia, M. Billeter, P. Güntert, K. Wüthrich, *J. Biomol. NMR* **1995**, *6*, 1-10.
- [10] W. Lee, M. Tonelli, J. L. Markley, *Bioinformatics* **2015**, *31*, 1325-1327.
- [11] P. Güntert, in *Protein NMR Techniques* (Ed.: A. K. Downing), Humana Press, Totowa, NJ, **2004**, pp. 353-378.
- [12] E. F. Pettersen, T. D. Goddard, C. C. Huang, G. S. Couch, D. M. Greenblatt, E. C. Meng, T. E. Ferrin, *J. Comput. Chem.* **2004**, *25*, 1605-1612.
